# Supplementary material for: LAGOS-NE: a multi-scaled geospatial and temporal database of lake ecological context and water quality for thousands of US lakes
Source: Oxford University Press journal article supplement (doi:10.1093/gigascience/gix101), 2017-10-19
Supplement: gigascience_6_12_gix101_s2.pdf [file gigascience_6_12_gix101_s2.pdf]

# GigaScience

## LAGOS-NE: A multi-scaled geospatial and temporal database of lake ecological context and water quality for thousands of U.S. lakes

--Manuscript Draft--

|                             |                                                                                                                                    |                                             |
|-----------------------------|------------------------------------------------------------------------------------------------------------------------------------|---------------------------------------------|
| <b>Manuscript Number:</b>   | GIGA-D-17-00112R1                                                                                                                  |                                             |
| <b>Full Title:</b>          | LAGOS-NE: A multi-scaled geospatial and temporal database of lake ecological context and water quality for thousands of U.S. lakes |                                             |
| <b>Article Type:</b>        | Data Note                                                                                                                          |                                             |
| <b>Funding Information:</b> | State of Maine                                                                                                                     | Lake Ecologist Linda C Bacon                |
|                             | U.S. Environmental Protection Agency (106/319)                                                                                     | Not applicable                              |
|                             | U.S. Army Corps of Engineers (US)                                                                                                  | Limnologist Marvin G Boyer                  |
|                             | Michigan Agricultural Experiment Station<br>Disciplinary Research Grant Program                                                    | Dr. Mary T Bremigan                         |
|                             | Michigan Department of Natural Resources                                                                                           | Associate Professor Kendra S Cheruvellil    |
|                             | National Science Foundation (1027253)                                                                                              | Professor Stephen K Hamilton                |
|                             | New York State Division of Water Quality                                                                                           | Chief Scott A Kishbaugh                     |
|                             | Wisconsin Department of Natural Resources                                                                                          | Professor Stephen R Carpenter               |
|                             | University of Wisconsin-Madison                                                                                                    | Professor Stephen R Carpenter               |
|                             | National Science Foundation (1455461)                                                                                              | Professor Stephen R Carpenter               |
|                             | Tribal General Fund                                                                                                                | Water Regulatory Specialist Karen E Bednar  |
|                             | Aquatic Plant Management Society                                                                                                   | Dr. Mary T Bremigan                         |
|                             | Aquatic Ecosystem Restoration Foundation                                                                                           | Dr. Mary T Bremigan                         |
|                             | Michigan State University                                                                                                          | Dr. Mary T Bremigan                         |
|                             | U.S. Environmental Protection Agency (U-915958801-2)                                                                               | Associate Professor Kendra S Cheruvellil    |
|                             | Andrew W. Mellon Foundation                                                                                                        | Professor Stephen R Carpenter               |
|                             | U.S. Fish and Wildlife Service (F-69-R)                                                                                            | Dr. Joseph D Conroy                         |
|                             | Iowa Department of Natural Resources (ESD04HALFasch110155)                                                                         | Research Associate Christopher T Filstrup   |
|                             | Minnesota Pollution Control Agency                                                                                                 | Dr. John A Downing                          |
|                             | National Science Foundation<br>Macrosystems Biology Program (EF-1065786, EF-1638679)                                               | Dr. Patricia Ann Soranno                    |
|                             | Ohio Department of Natural Resources<br>Division of Wildlife                                                                       | Professor Maria J Gonzalez                  |
|                             | University of Rhode Island Watershed Watch                                                                                         | Program Director Linda T Green              |
|                             | National Science Foundation North Temperate Lakes LTER Program (1440297)                                                           | Professor Paul C Hanson                     |
|                             | Lac du Flambeau Band and Bureau of Indian Affairs                                                                                  | Ecologist Celeste Hockings                  |
|                             | Indiana Department of Environmental Management                                                                                     | Clinical Professor Emeritus William W Jones |

|                                                                                    |                                                           |
|------------------------------------------------------------------------------------|-----------------------------------------------------------|
| Missouri Department of Natural Resources                                           | Curators' Professor Emeritus John R Jones                 |
| U.S. Environmental Protection Agency (US) Clean Water Act Section 16               | Water Quality Specialist Caroline M Keson                 |
| Michigan Department of Environmental Quality                                       | Academic Specialist Jo A Latimore                         |
| Massachusetts Water Supply Protection Trust                                        | Environmental Analyst Yuehlin Lee                         |
| U.S. Environmental Protection Agency (US) Clean Air Markets Division (LTM Network) | Biologist Clara S Funk                                    |
| New York City Department of Environmental Protection                               | Research Scientist Karen E.B Moore                        |
| U.S. Geological Survey (US) Water Availability and Use Science Program (WAUSP)     | Research Hydrologist Brian P Neff                         |
| U.S. Geological Survey                                                             | Research Hydrologist Donald O Rosenberry                  |
| New York State Energy Research and Development Authority                           | MS Karen M Roy                                            |
| National Institute of Food and Agriculture (1003732)                               | Dr. Lars G Rudstam                                        |
| New York State Department of Environmental Conservation                            | Senior Research Associate James R Jackson                 |
| Lake Sunapee Protective Association                                                | G. Evelyn Hutchinson Chair of Ecology Kathleen C Weathers |
| National Oceanic and Atmospheric Administration                                    | Senior Scientist Craig A Stow                             |
| Gull Lake Quality Organization                                                     | Senior Scientist Craig A Stow                             |
| Clean Michigan Initiative                                                          | Aquatic Biologist Marcy K Wilmes                          |
| City of New York                                                                   | Chief Lorraine L Janus                                    |
| National Science Foundation (US) DBI (1401954)                                     | Postdoctoral Fellow Sarah M Collins                       |
| National Institute of Food and Agriculture (176820)                                | Dr. Patricia Ann Soranno                                  |
| U.S. Environmental Protection Agency (US) Office of Research and Development       | Not applicable                                            |

**Abstract:**

**Background**  
Understanding the factors that affect water quality and the ecological services provided by freshwater ecosystems is an urgent global environmental issue. Predicting how water quality will respond to global changes not only requires water quality data, but also information about the ecological context of individual water bodies across broad spatial extents. Because lake water quality is usually sampled in limited geographic regions, often for limited time periods, assessing the environmental controls of water quality requires compilation of many datasets across broad regions and across time into an integrated database. LAGOS-NE accomplishes this goal for lakes in the northeastern-most 17 U.S. states.

**Findings**  
LAGOS-NE contains data for 51,101 lakes and reservoirs larger than 4 ha in 17 lake-rich U.S. states. The database includes three data modules for: lake location and physical characteristics for all lakes; ecological context (i.e., the land use, geologic, climatic, and hydrologic setting of lakes) for all lakes; and in situ measurements of lake water quality for a subset of the lakes from the past three decades for approximately 2,600-12,000 lakes depending on the variable. The database contains approximately 150,000 measures of total phosphorus, 200,000 measures of chlorophyll, and 900,000 measures of Secchi depth. The water quality data were compiled from 87 lake water quality datasets from federal, state, tribal, and non-profit agencies, university researchers, and citizen scientists.

|                                                      |                                                                                                                                                                                                                                                                                                                                                                                                                                                                                                                                                                                                                                                         |
|------------------------------------------------------|---------------------------------------------------------------------------------------------------------------------------------------------------------------------------------------------------------------------------------------------------------------------------------------------------------------------------------------------------------------------------------------------------------------------------------------------------------------------------------------------------------------------------------------------------------------------------------------------------------------------------------------------------------|
|                                                      | <p>Conclusions</p> <p>This database is one of the largest and most comprehensive databases of its type because it includes both in situ measurements and ecological context data. Because ecological context can be used to study a variety of other questions about lakes, streams, and wetlands, this database can also be used as the foundation for other studies of freshwaters at broad spatial and ecological scales.</p>                                                                                                                                                                                                                        |
| <b>Corresponding Author:</b>                         | <p>Patricia Ann Soranno, Ph.D<br/> Michigan State University<br/> East Lansing, Michigan UNITED STATES</p>                                                                                                                                                                                                                                                                                                                                                                                                                                                                                                                                              |
| <b>Corresponding Author Secondary Information:</b>   |                                                                                                                                                                                                                                                                                                                                                                                                                                                                                                                                                                                                                                                         |
| <b>Corresponding Author's Institution:</b>           | <p>Michigan State University</p>                                                                                                                                                                                                                                                                                                                                                                                                                                                                                                                                                                                                                        |
| <b>Corresponding Author's Secondary Institution:</b> |                                                                                                                                                                                                                                                                                                                                                                                                                                                                                                                                                                                                                                                         |
| <b>First Author:</b>                                 | <p>Patricia Ann Soranno, Ph.D</p>                                                                                                                                                                                                                                                                                                                                                                                                                                                                                                                                                                                                                       |
| <b>First Author Secondary Information:</b>           |                                                                                                                                                                                                                                                                                                                                                                                                                                                                                                                                                                                                                                                         |
| <b>Order of Authors:</b>                             | <p>Patricia Ann Soranno, Ph.D</p> <p>Linda C Bacon</p> <p>Michael Beauchene</p> <p>Karen E Bednar</p> <p>Edward G Bissell</p> <p>Claire K Boudreau</p> <p>Marvin G Boyer</p> <p>Mary T Bremigan</p> <p>Stephen R Carpenter</p> <p>Jamie W Carr</p> <p>Kendra S Cheruvellil</p> <p>Samuel T Christel</p> <p>Matt Claucherty</p> <p>Sarah M Collins</p> <p>Joseph D Conroy</p> <p>Jed Dukett</p> <p>John A Downing</p> <p>C. Emi Fergus</p> <p>Christopher T Filstrup</p> <p>Clara S Funk</p> <p>Maria J Gonzalez</p> <p>Linda T Green</p> <p>Corinna Gries</p> <p>John D Halfman</p> <p>Stephen K Hamilton</p> <p>Paul C Hanson</p> <p>Emily N Henry</p> |

|                        |
|------------------------|
| Elizabeth M Herron     |
| Celeste Hockings       |
| James R Jackson        |
| Kari Jacobson-Hedin    |
| Lorraine L Janus       |
| William W Jones        |
| John R Jones           |
| Caroline M Keson       |
| Katelyn B.S King       |
| Scott A Kishbaugh      |
| Jean-Francois Lapierre |
| Barbara F Lathrop      |
| Jo A Latimore          |
| Yuehlin Lee            |
| Noah R Lottig          |
| Jason A Lynch          |
| Leslie J Matthews      |
| Bill H McDowell        |
| Karen E.B Moore        |
| Brian P Neff           |
| Sarah J Nelson         |
| Samantha K Oliver      |
| Michael L Pace         |
| Don C Pierson          |
| Autumn C Poisson       |
| Amina I Pollard        |
| David M Post           |
| Paul O Reyes           |
| Donald O Rosenberry    |
| Karen M Roy            |
| Lars G Rudstam         |
| Orlando Sarnelle       |
| Nancy J Schuldt        |
| Caren E Scott          |
| Nicholas K Skaff       |
| Nicole J Smith         |
| Nick R Spinelli        |
| Joseph J Stachelek     |
| Emily H Stanley        |
| John L Stoddard        |
| Scott B Stopyak        |

|                                                |                                                                                                                                                                                                                                                                                                                                                                                                                                                                                                                                                                                                                                                                                                                                                                                                                                                                                                                                                                                                                                                                                                                                                                                                                                                                                                                                                                                                                                                                                                                                                                                                                                                                                                                                                                                                                                                                                                                                                                                                                                                                                                                                                                                                                                                                                                                                                                                                                                                                                                                                                                                                                                                                                                                                                                                                                                                                                                                                                                                                                            |
|------------------------------------------------|----------------------------------------------------------------------------------------------------------------------------------------------------------------------------------------------------------------------------------------------------------------------------------------------------------------------------------------------------------------------------------------------------------------------------------------------------------------------------------------------------------------------------------------------------------------------------------------------------------------------------------------------------------------------------------------------------------------------------------------------------------------------------------------------------------------------------------------------------------------------------------------------------------------------------------------------------------------------------------------------------------------------------------------------------------------------------------------------------------------------------------------------------------------------------------------------------------------------------------------------------------------------------------------------------------------------------------------------------------------------------------------------------------------------------------------------------------------------------------------------------------------------------------------------------------------------------------------------------------------------------------------------------------------------------------------------------------------------------------------------------------------------------------------------------------------------------------------------------------------------------------------------------------------------------------------------------------------------------------------------------------------------------------------------------------------------------------------------------------------------------------------------------------------------------------------------------------------------------------------------------------------------------------------------------------------------------------------------------------------------------------------------------------------------------------------------------------------------------------------------------------------------------------------------------------------------------------------------------------------------------------------------------------------------------------------------------------------------------------------------------------------------------------------------------------------------------------------------------------------------------------------------------------------------------------------------------------------------------------------------------------------------------|
|                                                |                                                                                                                                                                                                                                                                                                                                                                                                                                                                                                                                                                                                                                                                                                                                                                                                                                                                                                                                                                                                                                                                                                                                                                                                                                                                                                                                                                                                                                                                                                                                                                                                                                                                                                                                                                                                                                                                                                                                                                                                                                                                                                                                                                                                                                                                                                                                                                                                                                                                                                                                                                                                                                                                                                                                                                                                                                                                                                                                                                                                                            |
|                                                | Craig A Stow                                                                                                                                                                                                                                                                                                                                                                                                                                                                                                                                                                                                                                                                                                                                                                                                                                                                                                                                                                                                                                                                                                                                                                                                                                                                                                                                                                                                                                                                                                                                                                                                                                                                                                                                                                                                                                                                                                                                                                                                                                                                                                                                                                                                                                                                                                                                                                                                                                                                                                                                                                                                                                                                                                                                                                                                                                                                                                                                                                                                               |
|                                                | Jason M Tallant                                                                                                                                                                                                                                                                                                                                                                                                                                                                                                                                                                                                                                                                                                                                                                                                                                                                                                                                                                                                                                                                                                                                                                                                                                                                                                                                                                                                                                                                                                                                                                                                                                                                                                                                                                                                                                                                                                                                                                                                                                                                                                                                                                                                                                                                                                                                                                                                                                                                                                                                                                                                                                                                                                                                                                                                                                                                                                                                                                                                            |
|                                                | Pang-Ning Tan                                                                                                                                                                                                                                                                                                                                                                                                                                                                                                                                                                                                                                                                                                                                                                                                                                                                                                                                                                                                                                                                                                                                                                                                                                                                                                                                                                                                                                                                                                                                                                                                                                                                                                                                                                                                                                                                                                                                                                                                                                                                                                                                                                                                                                                                                                                                                                                                                                                                                                                                                                                                                                                                                                                                                                                                                                                                                                                                                                                                              |
|                                                | Anthony P Thorpe                                                                                                                                                                                                                                                                                                                                                                                                                                                                                                                                                                                                                                                                                                                                                                                                                                                                                                                                                                                                                                                                                                                                                                                                                                                                                                                                                                                                                                                                                                                                                                                                                                                                                                                                                                                                                                                                                                                                                                                                                                                                                                                                                                                                                                                                                                                                                                                                                                                                                                                                                                                                                                                                                                                                                                                                                                                                                                                                                                                                           |
|                                                | Ty Wagner                                                                                                                                                                                                                                                                                                                                                                                                                                                                                                                                                                                                                                                                                                                                                                                                                                                                                                                                                                                                                                                                                                                                                                                                                                                                                                                                                                                                                                                                                                                                                                                                                                                                                                                                                                                                                                                                                                                                                                                                                                                                                                                                                                                                                                                                                                                                                                                                                                                                                                                                                                                                                                                                                                                                                                                                                                                                                                                                                                                                                  |
|                                                | Michael J Vanni                                                                                                                                                                                                                                                                                                                                                                                                                                                                                                                                                                                                                                                                                                                                                                                                                                                                                                                                                                                                                                                                                                                                                                                                                                                                                                                                                                                                                                                                                                                                                                                                                                                                                                                                                                                                                                                                                                                                                                                                                                                                                                                                                                                                                                                                                                                                                                                                                                                                                                                                                                                                                                                                                                                                                                                                                                                                                                                                                                                                            |
|                                                | Gretchen Watkins                                                                                                                                                                                                                                                                                                                                                                                                                                                                                                                                                                                                                                                                                                                                                                                                                                                                                                                                                                                                                                                                                                                                                                                                                                                                                                                                                                                                                                                                                                                                                                                                                                                                                                                                                                                                                                                                                                                                                                                                                                                                                                                                                                                                                                                                                                                                                                                                                                                                                                                                                                                                                                                                                                                                                                                                                                                                                                                                                                                                           |
|                                                | Kathleen C Weathers                                                                                                                                                                                                                                                                                                                                                                                                                                                                                                                                                                                                                                                                                                                                                                                                                                                                                                                                                                                                                                                                                                                                                                                                                                                                                                                                                                                                                                                                                                                                                                                                                                                                                                                                                                                                                                                                                                                                                                                                                                                                                                                                                                                                                                                                                                                                                                                                                                                                                                                                                                                                                                                                                                                                                                                                                                                                                                                                                                                                        |
|                                                | Katherine E Webster                                                                                                                                                                                                                                                                                                                                                                                                                                                                                                                                                                                                                                                                                                                                                                                                                                                                                                                                                                                                                                                                                                                                                                                                                                                                                                                                                                                                                                                                                                                                                                                                                                                                                                                                                                                                                                                                                                                                                                                                                                                                                                                                                                                                                                                                                                                                                                                                                                                                                                                                                                                                                                                                                                                                                                                                                                                                                                                                                                                                        |
|                                                | Jeffrey D White                                                                                                                                                                                                                                                                                                                                                                                                                                                                                                                                                                                                                                                                                                                                                                                                                                                                                                                                                                                                                                                                                                                                                                                                                                                                                                                                                                                                                                                                                                                                                                                                                                                                                                                                                                                                                                                                                                                                                                                                                                                                                                                                                                                                                                                                                                                                                                                                                                                                                                                                                                                                                                                                                                                                                                                                                                                                                                                                                                                                            |
|                                                | Marcy K Wilmes                                                                                                                                                                                                                                                                                                                                                                                                                                                                                                                                                                                                                                                                                                                                                                                                                                                                                                                                                                                                                                                                                                                                                                                                                                                                                                                                                                                                                                                                                                                                                                                                                                                                                                                                                                                                                                                                                                                                                                                                                                                                                                                                                                                                                                                                                                                                                                                                                                                                                                                                                                                                                                                                                                                                                                                                                                                                                                                                                                                                             |
|                                                | Shuai Yuan                                                                                                                                                                                                                                                                                                                                                                                                                                                                                                                                                                                                                                                                                                                                                                                                                                                                                                                                                                                                                                                                                                                                                                                                                                                                                                                                                                                                                                                                                                                                                                                                                                                                                                                                                                                                                                                                                                                                                                                                                                                                                                                                                                                                                                                                                                                                                                                                                                                                                                                                                                                                                                                                                                                                                                                                                                                                                                                                                                                                                 |
| <b>Order of Authors Secondary Information:</b> |                                                                                                                                                                                                                                                                                                                                                                                                                                                                                                                                                                                                                                                                                                                                                                                                                                                                                                                                                                                                                                                                                                                                                                                                                                                                                                                                                                                                                                                                                                                                                                                                                                                                                                                                                                                                                                                                                                                                                                                                                                                                                                                                                                                                                                                                                                                                                                                                                                                                                                                                                                                                                                                                                                                                                                                                                                                                                                                                                                                                                            |
| <b>Response to Reviewers:</b>                  | <p>Response to Reviewer reports<br/> Soranno et al. Gigascience; July 14, 2017<br/> GIGA-D-17-00112 -- LAGOS-NE: A multi-scaled geospatial and temporal database of lake ecological context and water quality for thousands of U.S. lakes</p> <p>Reviewer #1:<br/> The compilation of LAGOS-NE is truly impressive work and I am really excited that the data is made publicly available now. I am sure this is a great resource for future work by you and by others.<br/> Overall, I liked the manuscript and was impressed by the care that went into creating and describing the database.<br/> Besides a few smaller comments (see remarks below and the comments in the attached pdf), I have only one more fundamental critique:<br/> I believe that usability and value of the database would be considerably improved, if the concepts were linked wherever that is possible to concepts grounded in ontologies. I know that not all concepts are modeled in ontologies yet, but at least for those that are, it would be good to provide that link instead of creating your own definitions. For those that are not in ontologies yet, it would be great, if you worked towards their addition. In the long run, this would ease the integration of LAGOS-NE with other upcoming databases and would contribute to a common understanding of the domain. [I don't see this linkage as a prerequisite to publication of the paper, but would really like to see it in the future].<br/> RESPONSE: We completely agree with the reviewer, however, currently, our community is not quite there yet. However, in our next LAGOS data project, we will strive to connect to existing ontologies and we are currently involved in an effort to construct and add a lake characteristic-related ontology to the existing ENVO (<a href="https://bioportal.bioontology.org/ontologies/ENVO">https://bioportal.bioontology.org/ontologies/ENVO</a>). We are collaborating with the curator of ENVO, computer scientists in Germany and semantics specialists in the US to accomplish this task. This is currently in the PhD thesis stage, once we are confident that we can connect the LAGOS concepts to the ENVO ontology we will do so in future LAGOS databases.</p> <p>You write in the introduction that you provide the water quality files, however, that URL is missing. I thus was not able to have a look at these files.<br/> RESPONSE: We have updated all URLs so they are all now active.</p> <p>Here are the smallish remarks:<br/> * I found a number of typos in the manuscript and marked them directly in the pdf. Please refer to the attachment.<br/> RESPONSE: We have fixed all identified typos that the reviewer identified in the manuscript that was attached, which we found to be very helpful. However, we have not removed brackets as those are required by the journal. In addition, the land use percentages do not add up to 100% because we only include the 4 dominant types.</p> |

We have added this to the table legend.

\* I had a look at the datasets and found some minor issues there:

\* The metadata about the LAGOS-LakeID says that this is a float and a ratio. Is that really correct?

RESPONSE: We have changed all ID's to type character.

\* In LAGOS\_LIMNO the limno definition (YYYY-MM-DD) and Format: mm/DD/YYYY of sample date are inconsistent.

RESPONSE: We have we corrected the date time format of the EML to be MM/DD/YYYY. This is the actual date time format used in the data table.

\* In LAGOS\_GEO both min and max values of county\_pct\_in\_nwi are 100%. Is that correct?

RESPONSE: yes, it is ok to have all 100%. For other spatial extents, these values are not always 100%.

Reviewer #2:

Review pertaining to general limnological information, manuscript text, and data sets: Gertrud Nürnberg, Ph.D., Freshwater Research ([www.fwr.ca](http://www.fwr.ca))

Review pertaining to data management and R-related files: Stefanie LaZerte, Ph.D. ([steffilazerte.ca](mailto:steffilazerte.ca))

Not reviewed: GIS related information

This manuscript describes and publishes the data files that were used in a previously published paper about methods of data base creation [17]. The authors are to be commended on this effort of making their large data set not only accessible, but also describing data quality/control/variability and providing data management tools for easy access and analysis. Such efforts should be supported and definitely warrant publication in a platform like GigaScience.

This manuscript repeats some of the general information published previously [17] in the introduction, general purpose, etc., which could be deleted. However, the text as assembled here may help the data file user to find much information without major searches in the previous paper; I therefore leave it up to the authors and the editors to decide whether shortening of the text is possible and necessary.

RESPONSE: We agree and have tried to make this paper a standalone paper with as little overlap as possible. Therefore we have decided to leave the text as is.

While some sections are repeated from the previous paper, an interesting and useful new section is provided at the end in Section 9. "Challenges and recommendations for creating large, integrated, and heterogeneous databases".

But I find costs provided in "The economic value of water quality data in an integrated database" (791-805) out of proportion. The cost estimate of a single lake sample of \$2000-6000, based on stream sampling, seems extremely high (line 799). Consider the inexpensive Secchi data and other data collected by volunteers. Commercial water TP analysis is typically less than Can\$45, and physical profile data (temperature, oxygen) do not require special expertise and time after an initial investments into equipment (<\$5000, depending on lake depth).

On the other hand, the section on "Strategies for broad-scale data-integration efforts" (lines 807-858) is well thought out and should help other, similar endeavours.

RESPONSE: we agree that there could be some cost savings in lakes, but then again, lake sampling also requires boats, trailers, etc that many stream sampling efforts do not. We did not include costs for secchi samples, and only include records for which a lab analysis is required. Nevertheless, as recommended, we lowered the range compared to stream samples of \$1000-\$4000 rather than \$2000-\$6000. This rough estimate is only intended to put the dataset and costs in context.

One strength of the chosen approach is the modular build. This make it possible to add potentially useful information, such as:

\*Information pertaining to internal P loading, including discrete depth samples of phosphorus, iron and manganese.

\*Information pertaining to cyanobacteria proliferation and blooms: Maximum chlorophyll concentration, phytoplankton species and biomass, cyanotoxins

Additional documents and files are extensive. They seem to explain and describe methods of data selection and other approaches used in detail. I believe that a potential user can find all the information needed to determine the data validity.

Detailed comments in the order of the text by line numbers follow:

105: Also indicate the number of nutrient data, especially of total phosphorus (TP).

RESPONSE: Done. We have added TP

107: Were there no data used from the published peer-reviewed scientific literature?

RESPONSE: No, we have found it sometimes too difficult to acquire the metadata for such studies, as well as the data themselves because historically, it has not been the practice to put data into data repositories. It was more efficient to get data directly from sources, and state agency datasets are larger, and contain more data than published studies typically.

140-1: A fitting reference would also be:

--Bachmann, R.W., Hoyer, M.V., and Canfield Jr, D.E. 2013. The extent that natural lakes in the United States of America have been changed by cultural eutrophication. *Limnol. Oceanogr* 58(3): 945-950.

RESPONSE: We have chosen not to cite this article due to the numerous responses to the article that were published questioning their conclusions.

157-160: It would be great to test this assumption of lacking metadata for the lake data (and not just citing river data and reference [16]).

RESPONSE: Yes, we agree, however, it is beyond the scope of our data paper to include this estimate. Further, we do not have any reason to expect it to differ greatly between lake and stream samples. Nevertheless, we are now working more closely with the authors of this article who are employees at the USGS for the next phase of our research to build LAGOS for the entire US by integrating more with the Water Quality Portal.

195: It would be helpful to be more specific: what time periods are usually provided (before 2012)?

RESPONSE: we agree. We have added: mostly from the late 1980's to up until about 2012.

255: Replace "were" with "was" (grammar)

RESPONSE: done

327-331: Phosphorus retention in lakes is not usually complete (100%) so the notion of "trapping" TP in any large upstream lakes is an oversimplification. Nonetheless, retention of large and deep lakes without internal loading is usually 70-90%, so that the assumption of R=100% is more valid than R=0%.

--Brett, M.T., and Benjamin, M.M. 2008. A review and reassessment of lake phosphorus retention and the nutrient loading concept. *Freshw. Biol.* 53: 194-211.

--Nürnberg, G.K. 1984. The prediction of internal phosphorus load in lakes with anoxic hypolimnia. *Limnol. Oceanogr.* 29: 111-124.

RESPONSE: We agree, but have chosen not to add citations as this is not a major focus of this manuscript and the paper that we cite also cites these papers within it.

405: It is confusing that in Table 2: "... lakes are counted for each state in which they occur (i.e., lakes that straddle two states are counted in both states)", while in other files such lakes are counted only once.

RESPONSE: We agree, however, there is little that we can do that would not require a complete GIS analysis to reclassify lakes by state and make decisions about which border lake belongs where. Unfortunately, lakes do not follow state borders, and different table summaries make different assumptions. We felt the important part of this table was to show the relative numbers of lakes by lake type rather than the state data, so slight discrepancies due to border issues was acceptable.

476: "All data in LAGOS-NELIMNO v1.087.1 are from samples that we identified as

being collected from either the lake surface or the epilimnion (the well-mixed surface layer of a thermally-stratified lake during the period of stratification)." As mentioned above, it would be useful to expand the dataset to include data that can be used to determine whether there is any sediment P release. Such data include hypolimnetic and discrete deep water samples during the stratification period in stratified lakes.  
RESPONSE: We certainly agree, and in fact some of those data reside in the master LAGOS-NE database, we just have not sufficiently processed them to make them available, nor do we have the associated temperature and dissolved oxygen profiles that would make those values even more useful. However, for the next version of LAGOS-US, we will include both oxygen and temperature profiles and possibly, lake nutrients at depth.

625: "We have published 10 articles using portions of this database". Perhaps these and the 13 articles in review (if available when this ms is published), could be listed and cited in a separate table. But perhaps the subsequent paragraph already refers to these references?

RESPONSE: Correct, the later paragraph describes them and cites the published studies. We would rather not provide citations to the in prep manuscripts in a table since those will likely change in the coming months and soon be out of date. However, we have updated any manuscripts that have now been published so that there are fewer 'in preparation' manuscripts that we discuss in this section. Further, we have chosen not to include a table of papers because this is not the main focus of this manuscript, and this section is intended to only show that many publications have used this database.

808: This sentence is not complete ("which" is awkward)

RESPONSE: We have fixed by adding 'and to identify the types of datasets....'

843: I think you mean "disseminate" rather than "dissemination"

RESPONSE: fixed.

-----

Data management and R-related files: reviewed by Stefanie LaZerte

This R package is a nice way of providing access to this large dataset. The package was generally easy to install and easy to use. I wasn't able to use `lagos_get()` to download, as it got through most but failed on one file. It was nice that the function detected previously downloaded files and resumed. But it would be even nicer if it had the option to skip over files that couldn't be reached.

RESPONSE: Now that all files are available on EDI and we have updated the package to point to them this should not be an issue. We agree that additional flexibility would be a nice feature. We have filed an issue on the Github repository and hope to implement this for users in the future.

I was able to use the files provided in the dropbox folder, by compiling them with the '`lagos_compile()`' function, although I needed to fix a couple of typos to make them work:

- '.txt' in LOCUS file needed to be renamed to '.csv'
- 'LakesLocus' should be lowercase

RESPONSE: Again, now that all files are available on EDI and we have updated the package to point to them this should not be an issue. We apologize for the earlier challenges in accessing the data.

Although not crucial, I would suggest having the compile function create individual rds files in a single directory, and then giving users the option of loading select datasets as the whole set is quite a large table.

RESPONSE: We agree that implementing additional flexibility would be a great option for users. We have filed an issue on the Github repository and we hope to implement this in the future.

The data itself was well explained and organized, but there is such a wealth of information it may become confusing. Perhaps consider making the output of `?dataset`



(e.g. ?county) specific to that particular dataset, so users don't have to scroll through the descriptions of all columns for all tables if they're only interested in the one.  
RESPONSE: We agree that there is a very large volume of information. We hope to eventually improve the organization of the metadata to maximize ease of use, which is an ongoing effort.

The ability to select by categories is very cool, and it would be nice to have a category for sample information (i.e. sampling event, lakeid, etc.)

RESPONSE: We agree that this is a fantastic idea and we have added this to our 'to do list' for updating the R package in the coming months, which we view as an ongoing process. Nevertheless, the package allows full access to the database now and improves accessibility of the data to other users. We will be working towards making it increasingly user-friendly with such ideas as this one.

Also, although not related to the quality of the dataset, consider including vignettes or more in-depth tutorials, perhaps for how to merge different data sets together or how to extract and transform particular columns (see coding example below). As the data is in wide format as opposed to long (e.g., years are in different columns, as opposed to having a single year column), the data will have to be transformed before most if not all types of analysis. These transformations are not always trivial. By providing some guidance and examples, the accessibility of the data by users less familiar with R can be improved. In particular, if downloading the data separately is expected to be a common place occurrence, there should be instructions for the use of the 'lago\_compile()' function.

RESPONSE: We definitely agree and have added a minimal vignette showing basic interaction with LAGOS

Overall I think this package is a convenient way of accessing both the datasets and the metadata. It is well documented and will be very useful to scientists wishing to use the data.

Minor Comments

- For imports, best to give a minimum version number, eg: dplyr (>= 0.7.0)

RESPONSE: Done

- Documentation for categories should read "waterquality" not "water.quality", also what tables does this category refer to?

RESPONSE: Fixed; It refers to the epi.nutr table. The

lagos\_select() documentation has been updated to make this more clear

Coding example

```
library(tidyverse)
```

```
library(stringr)
```

```
library(LAGOS)
```

```
dt <- lagos_load(version = "1.087.1")
```

```
c <- dt$county.chag %>%  
  as_tibble() %>%  
  select(county_zoneid, matches("dep")) %>%  
  gather(Variable, Value, -county_zoneid) %>%  
  mutate(Variable = str_replace(Variable, "county_dep_", ""),  
         Type = str_extract(Variable, "^[^_]+"),  
         Year = str_extract(Variable, "[0-9]{4}"),  
         Stat = str_extract(Variable, "[^_]+$")) %>%  
  select(-Variable)
```

```
x <- c %>%  
  filter(county_zoneid == "County_107",  
         Stat != "std")
```

```
ggplot(data = x,  
       aes(x = Year, y = Value, group = Stat, colour = Stat)) +  
  geom_line() +
```

facet\_wrap(~ Type, ncol = 1, scales = "free\_y")

-----End of review-----

Reviewer #3:

This paper provides a valuable documentation of a geospatial database for lakes of the upper midwest and northeast United States. The value of the database is well illustrated visually in non-uniform distributions of quality (Figure 5) and hydrological variables (Figure 6). The main points - some of which could be addressed in a revision of this paper - include:

(1)[comment only] I have a few misgivings about such a large author list. There is a good justification of the authorship and no doubt, with a few self-citations, this paper will become well cited. But it still does not sit entirely comfortably with me, especially when I can still readily pick out simple typographical errors.

RESPONSE: While we agree for more typical research papers, we do not agree for data papers, in which the author list should be as long as the number of individuals who provided data. We are fixing the typographical errors.

(2)I was disappointed that the dataset extended until 2012. This is hardly a contemporary dataset and it raises a question for me about whether the database is sufficiently nimble to allow rapid incorporation of recent data and time series analysis. RESPONSE: This is a major issue that we are now addressing in a new grant that will create LAGOS for the entire US and try to integrate with the WQX data repository for updates of newer datasets. Also, our work has shown that for many research questions, the spatial data (i.e., many lakes across broad regions) is more important than good temporal resolution.

(3)I was a little concerned about the large number of 'in prep' articles being cited in section 8. Are these all necessary. Could some be substituted or supplemented with recent published articles. Are other articles recent such as:

- Read JS, Winslow LA, Hansen GJA, Van Den Hoek J, Hanson PC, Bruce LC, Markfort CD 2014. Simulating 2368 temperate lakes reveals weak coherence in stratification phenology. Ecological Modelling 291, 142-150.

- Read EK, L Carr, L De Cicco, HA Dugan, PC Hanson, JA Hart, J Kreft, JS Read, LA Winslow. 2017. Water quality data for national-scale aquatic research: The Water Quality Portal. Water Resources Research. doi:10.1002/2016WR019993.

RESPONSE: These above articles do not use LAGOS data. This section of the manuscript, as requested by the journal, is intended to show the potential value of the dataset by showing the types of research that has been conducted to date. Because it took a long time to complete the database, many manuscripts are still in prep.

Although, now, some have been accepted, which we have updated, and in fact, a large number have been published relative to the numbers in preparation, so we have kept them in the manuscript to convey the types of research questions we are addressing with the database.

Minor points (relating mostly to minor typographical issues):

I118: Lake (case). FIXED

I141: in the same way. FIXED

I164: We created a database named LAGOS-NE... FIXED.

I184: composed should be comprised (do a global search) FIXED.

I201: future. UNCLEAR

I235: km<sup>2</sup> (superscript). FIXED.

I279: have FIXED.

I328: remove nutrient (or nutrients). NOT CHANGED AS THIS ALTERS THE MEANING TOO MUCH.

I1332-334: this sentence needs re-worded. DID NOT CHANGE AS WE DID NOT FIGURE OUT A DIFFERENT WAY TO SAY IT.

I383: km<sup>2</sup> (superscript) FIXED.

I435: they to it UNCLEAR

I450: did had? FIXED

I495: 1980s (it is plural not possessive); do global search FIXED.

I541 use [Greek] mu for micro FIXED

|                                                                                                                                                                                                                                                                                                                                                                                                                                                                                                                                     |                                                                                                                                                                                                                                                                                                                                                                                                              |
|-------------------------------------------------------------------------------------------------------------------------------------------------------------------------------------------------------------------------------------------------------------------------------------------------------------------------------------------------------------------------------------------------------------------------------------------------------------------------------------------------------------------------------------|--------------------------------------------------------------------------------------------------------------------------------------------------------------------------------------------------------------------------------------------------------------------------------------------------------------------------------------------------------------------------------------------------------------|
|                                                                                                                                                                                                                                                                                                                                                                                                                                                                                                                                     | <p>I580: The FIXED</p> <p>I591: proportions would sum to 1 (as opposed to percentages).<br/>RESPONSE: the land use percentages do not add up to 100% because we only include the 4 dominant types. We have added this to the table legend.</p> <p>I668: are to is FIXED</p> <p>I843: disseminate FIXED</p> <p>I802: that cost rather than the cost FIXED</p> <p>I808: re-word (related to 'which') FIXED</p> |
| <b>Additional Information:</b>                                                                                                                                                                                                                                                                                                                                                                                                                                                                                                      |                                                                                                                                                                                                                                                                                                                                                                                                              |
| <b>Question</b>                                                                                                                                                                                                                                                                                                                                                                                                                                                                                                                     | <b>Response</b>                                                                                                                                                                                                                                                                                                                                                                                              |
| Are you submitting this manuscript to a special series or article collection?                                                                                                                                                                                                                                                                                                                                                                                                                                                       | No                                                                                                                                                                                                                                                                                                                                                                                                           |
| <p><b>Experimental design and statistics</b></p> <p>Full details of the experimental design and statistical methods used should be given in the Methods section, as detailed in our <a href="#">Minimum Standards Reporting Checklist</a>. Information essential to interpreting the data presented should be made available in the figure legends.</p> <p>Have you included all the information requested in your manuscript?</p>                                                                                                  | Yes                                                                                                                                                                                                                                                                                                                                                                                                          |
| <p><b>Resources</b></p> <p>A description of all resources used, including antibodies, cell lines, animals and software tools, with enough information to allow them to be uniquely identified, should be included in the Methods section. Authors are strongly encouraged to cite <a href="#">Research Resource Identifiers</a> (RRIDs) for antibodies, model organisms and tools, where possible.</p> <p>Have you included the information requested as detailed in our <a href="#">Minimum Standards Reporting Checklist</a>?</p> | Yes                                                                                                                                                                                                                                                                                                                                                                                                          |
| <p><b>Availability of data and materials</b></p> <p>All datasets and code on which the conclusions of the paper rely must be either included in your submission or deposited in <a href="#">publicly available repositories</a> (where available and ethically appropriate), referencing such data using</p>                                                                                                                                                                                                                        | Yes                                                                                                                                                                                                                                                                                                                                                                                                          |

a unique identifier in the references and in the "Availability of Data and Materials" section of your manuscript.

Have you have met the above requirement as detailed in our [Minimum Standards Reporting Checklist?](#)

1  
2  
3  
4 1 *For submission as a Data Note to GigaScience*

5 2  
6 3  
7 4  
8 5  
9 6  
10 7  
11 8  
12 9  
13 10  
14 11  
15 12  
16 13  
17 14  
18 15  
19 16  
20 17  
21 18  
22 19  
23 20  
24 21  
25 22  
26 23  
27 24  
28 25  
29 26  
30 27  
31 28  
32 29  
33 30  
34 31  
35 32  
36 33  
37 34  
38 35  
39 36  
40 37  
41 38  
42 39  
43 40  
44 41  
45 42  
46 43  
47 44  
48 45  
49 46  
50 47  
51 48  
52 49  
53 50  
54 51  
55 52  
56 53  
57 54  
58 55  
59 56  
60 57  
61 58  
62 59  
63 60  
64 61  
65 62

## LAGOS-NE: A multi-scaled geospatial and temporal database of lake ecological context and water quality for thousands of U.S. lakes

### Authors:

13 Patricia A. Soranno<sup>1</sup>, Linda C. Bacon<sup>2</sup>, Michael Beauchene<sup>3</sup>, Karen E. Bednar<sup>4</sup>, Edward G. Bissell<sup>1</sup>, Claire K. Boudreau<sup>1</sup>, Marvin G. Boyer<sup>5</sup>, Mary T. Bremigan<sup>1</sup>, Stephen R. Carpenter<sup>6</sup>, Jamie W. Carr<sup>7</sup>, Kendra S. Cheruvilil<sup>1</sup>, Samuel T. Christel<sup>6</sup>, Matt Claucherty<sup>8</sup>, Sarah M. Collins<sup>6</sup>, Joseph D. Conroy<sup>9</sup>, John A. Downing<sup>10</sup>, Jed Dukett<sup>11</sup>, C. Emi Fergus<sup>12</sup>, Christopher T. Filstrup<sup>10</sup>, Clara Funk<sup>13</sup>, Maria J. Gonzalez<sup>14</sup>, Linda T. Green<sup>15</sup>, Corinna Gries<sup>6</sup>, John D. Halfman<sup>16</sup>, Stephen K. Hamilton<sup>17</sup>, Paul C. Hanson<sup>6</sup>, Emily N. Henry<sup>18</sup>, Elizabeth M. Herron<sup>19</sup>, Celeste Hockings<sup>20</sup>, James R. Jackson<sup>21</sup>, Kari Jacobson-Hedin<sup>22</sup>, Lorraine L. Janus<sup>23</sup>, William W. Jones<sup>24</sup>, John R. Jones<sup>25</sup>, Caroline M. Keson<sup>26</sup>, Katelyn B.S. King<sup>1</sup>, Scott A. Kishbaugh<sup>27</sup>, Jean-Francois Lapierre<sup>28</sup>, Barbara Lathrop<sup>29</sup>, Jo A. Latimore<sup>1</sup>, Yuehlin Lee<sup>30</sup>, Noah R. Lottig<sup>31</sup>, Jason A. Lynch<sup>13</sup>, Leslie J. Matthews<sup>33</sup>, William H. McDowell<sup>34</sup>, Karen E.B. Moore<sup>35</sup>, Brian P. Neff<sup>36</sup>, Sarah J. Nelson<sup>37</sup>, Samantha K. Oliver<sup>6</sup>, Michael L. Pace<sup>38</sup>, Donald C. Pierson<sup>39</sup>, Autumn C. Poisson<sup>1</sup>, Amina I. Pollard<sup>40</sup>, David M. Post<sup>41</sup>, Paul O. Reyes<sup>30</sup>, Donald O. Rosenberry<sup>42</sup>, Karen M. Roy<sup>43</sup>, Lars G. Rudstam<sup>44</sup>, Orlando Sarnelle<sup>1</sup>, Nancy J. Schuldt<sup>45</sup>, Caren E. Scott<sup>46</sup>, Nicholas K. Skaff<sup>1</sup>, Nicole J. Smith<sup>1</sup>, Nick R. Spinelli<sup>47</sup>, Joseph J. Stachelek<sup>1</sup>, Emily H. Stanley<sup>6</sup>, John L. Stoddard<sup>48</sup>, Scott B. Stopyak<sup>49</sup>, Craig A. Stow<sup>50</sup>, Jason M. Tallant<sup>51</sup>, Pang-Ning Tan<sup>52</sup>, Anthony P. Thorpe<sup>25</sup>, Michael J. Vanni<sup>53</sup>, Tyler Wagner<sup>54</sup>, Gretchen Watkins<sup>4</sup>, Kathleen C. Weathers<sup>56</sup>, Katherine E. Webster<sup>57</sup>, Jeffrey D. White<sup>58</sup>, Marcy K. Wilmes<sup>59</sup>, Shuai Yuan<sup>52</sup>

<sup>1</sup>Department of Fisheries and Wildlife, Michigan State University, East Lansing, MI 48824, USA

<sup>2</sup>Department of Environmental Protection, State of Maine, Augusta, ME 04330, USA

<sup>3</sup>Department of Energy and Environmental Protection, State of Connecticut, Hartford, CT 06106, USA

<sup>4</sup>Water Resources Program, Lac du Flambeau Tribal Natural Resources, Lac du Flambeau, WI, USA

<sup>5</sup>Environmental Planning, US Army Corps of Engineers, Kansas City, MO 64106, USA

<sup>6</sup>Center for Limnology, University of Wisconsin Madison, Madison, WI 53706 USA

<sup>7</sup>Office of Watershed Management, Massachusetts Department of Conservation and Recreation, West Boylston, MA 10583, USA

<sup>8</sup>Watershed Protection, Tipp of the Mitt Watershed Council, Petoskey, MI 49770, USA

<sup>9</sup>Division of Wildlife, Inland Fisheries Research Unit, Ohio Department of Natural Resources, Hebron, OH 43025, USA

<sup>10</sup>Large Lakes Observatory, University of Minnesota, Duluth, MN 55812 USA

<sup>11</sup>Adirondack Lake Survey Corporation, Ray Brook, NY 12977 USA

<sup>12</sup>National Research Council, US Environmental Protection Agency, Corvallis, OR 97333, USA

<sup>13</sup>Office of Air and Radiation, US Environmental Protection Agency, Washington, DC 20460, USA

<sup>14</sup>Department of Biology, Miami University, Oxford, OH 45056, USA

<sup>15</sup>Natural Resource Science, University of Rhode Island, Kingston, RI 02892 USA

<sup>16</sup>Geoscience, Hobart & William Smith Colleges, Geneva, NY 14456 USA

<sup>17</sup>Kellogg Biological Station, Michigan State University, Hickory Corners, MI 49060, USA

<sup>18</sup>Outreach and Engagement, Oregon State University, Corvallis, OR 97331, USA

<sup>19</sup>Watershed Watch, University of Rhode Island, Kingston, RI 02881, USA

<sup>20</sup>Natural Resource Department, Lac du Flambeau Band of Lake Superior Chippewa Indians, Lac du Flambeau, WI 54538, USA

<sup>21</sup>Department of Natural Resources, Cornell University, Bridgeport, NY, USA

1  
2  
3  
4 50 <sup>22</sup>Office of Water Protection, Fond du Lac Reservation, Cloquet, MN 55720 USA  
5 51 <sup>23</sup>Bureau of Water Supply, New York City Department of Environmental Protection, Valhalla, NY 10560, USA  
6 52 <sup>24</sup>School of Public and Environmental Affairs, Indiana University, Bloomington, IN 47408, USA  
7 53 <sup>25</sup>School of Natural Resources, University of Missouri, Columbia, MO, USA  
8 54 <sup>26</sup>Natural Resource Department, Little Traverse Bay Bands of Odawa Indians, Harbor Springs, MI 49740, USA  
9 55 <sup>27</sup>Division of Water, New York State Department of Environmental Conservation, Albany, NY 12233, USA  
10 56 <sup>28</sup>Department of Biological Science, University of Montreal, Montreal Quebec, Canada, H3C 3J7  
11 57 <sup>29</sup>Pennsylvania Department of Environmental Protection, State of Pennsylvania, Harrisburg, PA 17101 USA  
12 58 <sup>30</sup>Office of Watershed Management, Massachusetts Department of Conservation and Recreation, Belchertown, MA 01007, USA  
13 59 <sup>31</sup>Trout Lake Research Station, University of Wisconsin, Boulder Junction, WI 54512, USA  
14 60 <sup>33</sup>Lakes and Ponds Program, Vermont Department of Environmental Conservation, Montpelier, VT 05620, USA  
15 61 <sup>34</sup>Natural Resources and the Environment, University of New Hampshire, Durham, NH 03824, USA  
16 62 <sup>35</sup>Water Quality Science and Research, New York City Department of Environmental Protection, Kingston, NY 12401, USA  
17 63 <sup>36</sup>Denver Federal Center, USGS, Lakewood, CO 80225, USA  
18 64 <sup>37</sup>School of Forest Resources, University of Maine, Orono, ME, USA  
19 65 <sup>38</sup>Department of Environmental Science, University of Virginia, Charlottesville, VA 22904, USA  
20 66 <sup>39</sup>Department of Ecology and Genetics, Uppsala University, Uppsala, Sweden  
21 67 <sup>40</sup>Office of Water, US EPA, Washington, DC 20460, USA  
22 68 <sup>41</sup>Ecology and Evolutionary Biology, Yale University, Connecticut 06511, USA  
23 69 <sup>42</sup>National Research Program, USGS, Denver, CO 80225, USA  
24 70 <sup>43</sup>Division of Air Resources, New York State Department of Environmental Conservation, Ray Brook, NY 12977, USA  
25 71 <sup>44</sup>Department of Natural Resources, Cornell University, Ithaca, NY 14850, USA  
26 72 <sup>45</sup>Environmental Program, Fond du Lac Band of Lake Superior Chippewa Indians, Cloquet, MN 55720, USA  
27 73 <sup>46</sup>Aquatic Science, NEON, Boulder, CO 80301, USA  
28 74 <sup>47</sup>Watershed Management, Lake Wallenpaupack Watershed Management District, Hawley, PA, USA  
29 75 <sup>48</sup>Western Ecology Division, Office of Research and Development, US EPA, Corvallis, OR 97333, USA  
30 76 <sup>49</sup>Technology Services, Eaton County, Charlotte, MI, USA  
31 77 <sup>50</sup>Great Lakes Environmental Research Lab, NOAA, Ann Arbor, MI 47176, USA  
32 78 <sup>51</sup>Biological Station, University of Michigan, Pellston, MI 49769, USA  
33 79 <sup>52</sup>Computer Science and Engineering, Michigan State University, East Lansing, MI 48824, USA  
34 80 <sup>53</sup>Department of Zoology, Miami University, Oxford, OH 45056 USA  
35 81 <sup>54</sup>Pennsylvania Cooperative Fish and Wildlife Research Institute, Pennsylvania State University, University Park, PA 16802, USA  
36 82 <sup>56</sup>Cary Institute of Ecosystem Studies, Millbrook, NY, USA  
37 83 <sup>57</sup>School of Natural Sciences, Trinity College, Dublin, Ireland  
38 84 <sup>58</sup>Biology Department, Framingham State University, Framingham, MA 01702, USA  
39 85 <sup>59</sup>Department of Environmental Quality, State of Michigan, Lansing, MI 48909, USA  
40  
41  
42 86  
43  
44  
45  
46  
47  
48  
49  
50  
51  
52  
53  
54  
55  
56  
57  
58  
59  
60  
61  
62  
63  
64  
65

1  
2  
3  
4  
5  
6  
7  
8  
9  
10  
11  
12  
13  
14  
15  
16  
17  
18  
19  
20  
21  
22  
23  
24  
25  
26  
27  
28  
29  
30  
31  
32  
33  
34  
35  
36  
37  
38  
39  
40  
41  
42  
43  
44  
45  
46  
47  
48  
49  
50  
51  
52  
53  
54  
55  
56  
57  
58  
59  
60  
61  
62  
63  
64  
65

87  
88  
89  
90  
91  
92  
93  
94  
95  
96  
97  
98  
99  
100  
101  
102  
103  
104  
105  
106  
107  
108  
109  
110  
111  
112  
113  
114  
115  
116  
117  
118  
119  
120  
121  
122  
123  
124  
125  
126  
127  
128  
129  
130  
131  
132

**ABSTRACT**

**Background**

Understanding the factors that affect water quality and the ecological services provided by freshwater ecosystems is an urgent global environmental issue. Predicting how water quality will respond to global changes not only requires water quality data, but also information about the ecological context of individual water bodies across broad spatial extents. Because lake water quality is usually sampled in limited geographic regions, often for limited time periods, assessing the environmental controls of water quality requires compilation of many datasets across broad regions and across time into an integrated database. LAGOS-NE accomplishes this goal for lakes in the northeastern-most 17 U.S. states.

**Findings**

LAGOS-NE contains data for 51,101 lakes and reservoirs larger than 4 ha in 17 lake-rich U.S. states. The database includes three data modules for: lake location and physical characteristics for all lakes; ecological context (i.e., the land use, geologic, climatic, and hydrologic setting of lakes) for all lakes; and in situ measurements of lake water quality for a subset of the lakes from the past three decades for approximately 2,600-12,000 lakes depending on the variable. The database contains approximately 150,000 measures of total phosphorus, 200,000 measures of chlorophyll, and 900,000 measures of Secchi depth. The water quality data were compiled from 87 lake water quality datasets from federal, state, tribal, and non-profit agencies, university researchers, and citizen scientists.

**Conclusions**

This database is one of the largest and most comprehensive databases of its type because it includes both in situ measurements and ecological context data. Because ecological context can be used to study a variety of other questions about lakes, streams, and wetlands, this database can also be used as the foundation for other studies of freshwaters at broad spatial and ecological scales.

**KEYWORDS**

Lake eutrophication, Nutrients, Water quality, Lake trophic state, Ecological context, LAGOS-NE, Open science, Lake database

# 1. Data Description

A major concern for water quality in freshwaters globally is cultural eutrophication, or excess nutrient inputs from human activities that lead to increased plant and algal growth. In many parts of the world, runoff from land, or nonpoint-source pollution, has replaced discharges of sewage, or point-source pollution, as the primary driver of lake and reservoir eutrophication [1]. In lakes and reservoirs, eutrophication is expected to become more widespread in the coming decades as the human population increases and climate and land use change commensurately, placing increasing pressures on freshwaters [2,3,4]; although, there is also recognition that eutrophication or its response to management actions does not progress in the same way in all lakes (e.g., [5,6,7]). Most research to understand lake nutrients and their effects on algae, plants, and aquatic food webs has been conducted in individual or small groups of lakes by studying the complex within-lake mechanisms that control responses to nutrients (e.g., [8,9]). Such relationships and interactions have also been found to be influenced by the ecological context of lakes (i.e., the land use, geologic, climatic, and hydrologic setting of lakes), which varies by lake and region, and is multi-scaled. In fact, it is not always clear whether local or regional ecological context matters more for predicting lake eutrophication (e.g., [10,11,12]). Therefore, determining the current extent of lake eutrophication and predicting how eutrophication will respond to future global change requires water quality data (e.g., nutrients, water clarity, and chlorophyll concentrations) and measures of lake ecological context across regions, the continent, and the globe (e.g., 13,14,15).

In practice, measures of water quality are often collected from a relatively small number of lakes within individual regions. In the U.S., large investments have been made in water quality monitoring by federal, state, local, and tribal governments; and, many, but not all, of the datasets have been placed in government data repositories such as the USGS National Water Information System (NWIS) and the USEPA Storage and Retrieval (STORET) database. Unfortunately, these data repositories do not currently allow us to study lake water quality at broad scales. Despite the large number of water quality records in these systems, a recent analysis of their stream nutrient data found that over half of the data records lacked the most critical metadata necessary to make the data usable (e.g., chemical form, parameter name, units; [16]); and, we would expect a similar result with lake data because they are typically treated similarly to stream nutrient data. In addition, STORET and NWIS do not include any measures of lake ecological context. Therefore, to study the controls of eutrophication specifically, and water quality in general, requires development of a comprehensive database for lake water quality that is integrated with measures of lake ecological context and sufficient metadata for robust analysis.

We created a database called LAGOS-NE, the ‘lake multi-scaled geospatial and temporal database’ for thousands of inland lakes in 17 of the most lake-rich states in the upper midwest and northeastern U.S. (Figure 1). We avoided the problem of lack of metadata for the water quality data by contacting the original data providers for water quality data, asking for metadata, and only including data for which sufficient metadata were available. We addressed the problem of lack of ecological-context data by creating our own database of lake ecological context. The detailed methods and approach for building this database have been published previously [17]; here we publish and describe the database for the 51,101 lakes and reservoirs  $\geq 4$  ha in the study area (1,800,000 km<sup>2</sup>).

We had three related motivations for developing this database: (1) to facilitate further development of our basic understanding of lake water quality at broad scales using water quality data on thousands of lakes collected over the last several decades (see [11,17] for details); (2) to build the capacity to apply this scientific understanding to environmental management and policy of inland waters; and, (3) to foster broad-scale research by designing an open-science database that is extensible for future uses and by making the data and methods publicly accessible.

**Figure 1. Map of the study extent of LAGOS-NE.** Map includes 17 states in the upper midwest and northeastern U.S. outlined in white and 51,101 lakes  $\geq 4$  ha shown as blue polygons. Some lakes extend beyond state borders and are included in the database if it was possible to delineate their watersheds. Watershed boundaries rather than state boundaries were used for all analyses of lakes, streams and wetlands. The map is modified from [17].



1  
2  
3  
4 184 LAGOS-NE is comprised of three data modules that, although integrated in the same database,  
5 185 were derived using different data sources and data integration methods, and thus must be version-  
6 186 controlled separately. LAGOS-NE<sub>LOCUS</sub> v1.01 includes lake location and physical characteristics based on  
7 187 an existing national-scale database of lake and streams in the U.S. for all lakes. LAGOS-NE<sub>GEO</sub> v1.05  
8 188 includes measures of land, water, and air (ecological context) obtained from existing national scale GIS  
9 189 (geographic information system) datasets and measured in multiple zones (delineated by different spatial  
10 190 classifications) around all lakes. This module also contains some temporal data for climate, land  
11 191 use/cover, and atmospheric deposition variables. LAGOS-NE<sub>LIMNO</sub> v1.087.1 includes in-situ  
12 192 measurements of lake water quality for a subset of the above lakes. These 87 datasets of lake water  
13 193 quality were obtained from a combination of sources including government, tribal agencies, university  
14 194 researchers, citizen scientists, and non-profit agencies. Samples were taken during any season of the year  
15 195 from the most recent decades, mostly from the late 1980's to 2012.

16 196 The largest challenge in building LAGOS-NE was the heterogeneity of the dataset formats,  
17 197 variable conventions and units, and metadata, none which were standardized. Many steps of data  
18 198 integration required manual input from experts in diverse fields and close collaboration among specialists  
19 199 in ecoinformatics, database design, freshwater ecology, and geography; all combined, the effort took six  
20 200 years and involved ~15 individuals, spread across numerous institutions.

21 201 We designed the database using principles of open science so futures users could ask new  
22 202 research questions by using the existing database or adding new data modules to the database. To ensure  
23 203 users could do this, we documented the major steps of dataset integration and carefully integrated  
24 204 metadata directly into the database itself, we emphasized data provenance, and we used a database  
25 205 versioning system. In this data paper, we make the following research products available: (1) data tables  
26 206 with the data that make up LAGOS-NE and an R package for accessing the data and integrating the  
27 207 tables; (2) for each of the 87 water quality datasets, we provide the EML (ecological metadata language)  
28 208 metadata files that we authored after receiving the data, the data files that we processed to import into  
29 209 LAGOS-NE, and the R-script that we wrote to process the data; and (3) GIS coverages of the underlying  
30 210 freshwater geographic features (lakes, streams and wetlands) that are linked to the data tables for GIS  
31 211 processing by researchers.  
32 212

## 33 213 **2. Study site: Midwest and Northeast U.S. lakes**

34 214 We selected an area of the U.S. known to have large numbers of lakes, well-developed lake water  
35 215 quality sampling programs, and that spans diverse geographic conditions and thus gradients of ecological  
36 216 context (Table 1). Our study area of 17 U.S. states includes 51,101 lakes  $\geq 4$  ha (Figure 1). These states  
37 217 are in the north temperate climatic zone, which experience cold winters and warm, humid summers. The  
38 218 study area includes part of the Interior Plains, Laurentian Uplands, Appalachian Highlands, and Atlantic  
39 219 Plain geological provinces, and thus encapsulate a range of geological ages, glacial histories, and  
40 220 topography. Land use/cover is highly variable, ranging from regions of intense agriculture in the corn belt  
41 221 that spans portions of Minnesota, Wisconsin, Iowa, Missouri, Indiana, and Ohio, to predominantly  
42 222 forested or urban regions of the northeastern U.S., including the states of Maine, New Hampshire, New  
43 223 Jersey, and parts of New York, and primarily forested regions of northern Minnesota, Wisconsin, and  
44 224 Michigan.

45 225 Although the majority of the data that we provide are for lakes  $\geq 4$  ha (see below for reasons for  
46 226 using this threshold), we do include some data on lakes  $\geq 1$  ha and  $< 4$  ha if data were available. Although  
47 227 there may be water quality data for some lakes in this smaller size range, ecological context variables are  
48 228 not available for these lakes.  
49 229

50 230  
51 231  
52 232  
53 233  
54 234  
55  
56  
57  
58  
59  
60

235 **Table 1: Summary statistics for LAGOS-NE study area.**

| State         | Area (km <sup>2</sup> ) | Number of lakes (≥4 ha) | Mean annual temperature (°C) | Mean annual precipitation (mm) | % Agricultural land | % Urban land | % Forested land | % Wetland |
|---------------|-------------------------|-------------------------|------------------------------|--------------------------------|---------------------|--------------|-----------------|-----------|
| Connecticut   | 12,878                  | 763                     | 9.7                          | 1253                           | 7.2                 | 24.4         | 54.5            | 9.0       |
| Illinois      | 145,920                 | 2,819                   | 11.3                         | 1005                           | 68.9                | 11.9         | 15.0            | 1.7       |
| Indiana       | 93,717                  | 1,874                   | 11.2                         | 1072                           | 62.0                | 10.8         | 22.5            | 1.5       |
| Iowa          | 145,736                 | 903                     | 9.1                          | 881                            | 78.0                | 7.5          | 6.9             | 1.9       |
| Maine         | 84,123                  | 2,645                   | 5.1                          | 1149                           | 3.7                 | 3.5          | 66.9            | 12.1      |
| Massachusetts | 21,013                  | 1,698                   | 8.9                          | 1235                           | 5.8                 | 25.2         | 50.1            | 12.2      |
| Michigan      | 150,489                 | 6,511                   | 7.2                          | 841                            | 26.2                | 10.6         | 35.5            | 19.2      |
| Minnesota     | 218,543                 | 13,984                  | 5.3                          | 709                            | 44.7                | 5.7          | 19.7            | 19.0      |
| Missouri      | 180,537                 | 1,858                   | 12.7                         | 1100                           | 50.7                | 7.0          | 36.6            | 2.1       |
| New Hampshire | 23,980                  | 1,109                   | 6.5                          | 1209                           | 3.8                 | 7.9          | 74.5            | 6.4       |
| New Jersey    | 19,599                  | 1,143                   | 11.8                         | 1188                           | 13.8                | 31.1         | 27.9            | 21.4      |
| New York      | 126,070                 | 4,461                   | 7.6                          | 1094                           | 21.9                | 9.3          | 54.1            | 7.2       |
| Ohio          | 106,917                 | 1,279                   | 10.6                         | 1003                           | 50.0                | 14.7         | 30.9            | 1.0       |
| Pennsylvania  | 117,293                 | 1,755                   | 9.3                          | 1109                           | 22.7                | 12.3         | 59.5            | 1.6       |
| Rhode Island  | 2,809                   | 253                     | 10.0                         | 1246                           | 4.9                 | 29.5         | 44.6            | 13.6      |
| Vermont       | 24,913                  | 528                     | 5.9                          | 1176                           | 13.3                | 5.5          | 70.0            | 4.7       |
| Wisconsin     | 145,295                 | 6,009                   | 6.6                          | 831                            | 36.7                | 7.5          | 35.5            | 13.7      |

236 This table includes numbers of lakes and geophysical setting of each state and state averages for climate and the 4  
 237 major land use/cover types, which do not add up to 100% because we do not include all cover types. Temperature  
 238 and precipitation data are 30 year climate normals (1981-2010); land use/cover data are from the 2011 National  
 239 Land Cover Database (NLCD). Note, border lakes are only counted in one state.  
 240

### 241 3. Overview of LAGOS-NE

242 LAGOS-NE includes some data on all lakes in a study area (above the minimum lake area  
 243 threshold, which was 4 ha), which we call the ‘census’ population of lakes. The census population of  
 244 lakes is a critical feature of LAGOS-NE because it allows us to characterize the ecological context of  
 245 every lake in our study population and to identify whether the lakes for which we have water quality data  
 246 are biased in any way. LAGOS-NE includes three main categories of variables: (1) variables that describe  
 247 the physical characteristics and location of lakes themselves; (2) variables that describe in-situ water  
 248 quality; and (3) variables that describe a lake’s ecological context at multiple scales, and across multiple  
 249 dimensions (such as hydrology, geology, land use, climate, etc.) based on the principles of landscape  
 250 limnology [18,19,20,12]. Three factors dictated which data were included: past research and theory about  
 251 the spatial and temporal controls of lake water quality, data availability and quality, and the time and  
 252 resources necessary to compile, integrate, or process the original data. In other words, data that were  
 253 especially time- and resource-intensive to collate, integrate, or process were given lowest priority and in  
 254 some cases, were not ultimately incorporated into the database.

255 There was a number of constraints for each of the categories of data that had to be considered.  
 256 For creating the census population of lakes (i.e., their geospatial location, perimeter, and surface area), we  
 257 relied on a single source of data (the 1:24,000 National Hydrography Dataset (NHD) [21]). For the in-situ  
 258 water quality data, we incorporated data only if they were in a digitally-accessible format such as a text or  
 259 spreadsheet file. Finally, for the ecological-context variables, we included only data for which we could  
 260 obtain a GIS or raster coverage at the national or state scale for all 17 states.

261 We organized these three categories of data into database ‘modules’ that had similar data types  
 262 and sources so that we could develop procedures and set standards for each module (Figure 2). The  
 263 module structure also facilitates data reuse and extension by accommodating future data modules related  
 264 to any other lake or ecological-context feature.  
 265  
 266  
 267

**Figure 2. LAGOS-NE data modules and version numbers.** The data modules and versions that are included in LAGOS-NE and are available with this paper include: LAGOS-NE<sub>GEO</sub> v.1.05, LAGOS-NE<sub>LOCUS</sub> v.1.01 (note, that in Soranno et al. [17], this module was called LAGOS-lakes), and LAGOS-NE<sub>LIMNO</sub> v.1.087.1. We include descriptions of the type of data that are included in each module; with the major categories of variables the same as those describing the data tables in Additional File 1. The black connectors among the modules show that the modules are connected to each other through common unique identifiers through the LAGOS-NE<sub>LOCUS</sub> module (either the unique lake ID or the zone ID). P is phosphorus, N is nitrogen, C is carbon, S is sulfur, atm is atmospheric, NHD is the National Hydrography Dataset, IWS is the interlake watershed, WBD is the Watershed Boundary Dataset, EDU is Ecological Drainage Unit. Figure is modified from Figure 1 in Soranno et al. [17].

The design of LAGOS-NE and the workflow for its construction have been described previously in detail [17]. In particular, the database design is based on the CUAHSI ODM as described in [17]. Here, we provide a brief overview. One important guiding principle in creating LAGOS-NE was to ensure data provenance, i.e., that we could trace the original source data through to the final LAGOS-NE database. Because each data module had different types of source data, we developed different procedures for data provenance for each module, described in Soranno et al. [17] and in this paper. The database model is based on the Consortium of Universities for the Advancement of Hydrologic Science, Inc. (CUAHSI) Community Observations Data Model (ODM) because it is a flexible data model (i.e., allows the incorporation of wide range of types of data) that allows for the incorporation of controlled vocabulary and, importantly, allows for extensive documentation through a relational database structure of linked tables containing metadata [17]. The database was created and is maintained in PostgreSQL v9.1. However, for researchers to use the database for analysis and modeling, it is necessary to export the data into tables that can be processed by statistical packages or computer code. Therefore, we exported the data into a series of tables (of similar data) that are needed to conduct research on either the census population of lakes, the lakes for which there are water quality data, or some combination. These are the data files that have been used to conduct research on LAGOS-NE to date, and that we make available in this data paper (see Additional File 1 for a list of the tables and associated data that we are making available). Further, we also make our GIS datasets available to facilitate geospatial analyses of lakes, streams, and wetlands used to create some of the major components of LAGOS-NE.

#### 4. Description of LAGOS-NE<sub>LOCUS</sub> v1.01 data module

The LAGOS-NE<sub>LOCUS</sub> module includes data on the physical location, some features and unique identifiers for all lakes in the study area  $\geq 1$  ha, which means this data file has information on 141,378 lakes. Note, that because we detected errors in the digitization of lakes between 1 and 4 ha, we have chosen to define our census population of lakes as only those  $\geq 4$  ha, but we still make data available for lakes smaller than 4 ha when available in this and the LAGOS-NE<sub>LIMNO</sub> data module. However, we recommend caution in analyses, interpretation, and inference for lakes  $< 4$  ha in this database that depend on NHD's spatial representation and detection of water bodies. The data in this module include: lake unique identifiers, perimeter, area, latitude and longitude (which is typically the centroid of the lake or a central point that is within the lake boundary), GNIS name, and the zone IDs that the lake is located within (e.g., state, county, the hydrologic unit at each level (HU4, HU8, and HU12)). The GIS datasets that we also make available provide the lake polygon features associated with this module, as well as coverages for: lake watersheds, streams, wetlands, spatial classifications, and glaciation history.

Definition of lakes: We defined lakes previously in Soranno et al. [17] as follows. A 'lake' in LAGOS-NE is a perennial body of relatively still water. We include lakes and reservoirs that range from being completely natural to highly modified: lake basins can be entirely natural, modified natural (i.e., a water control structure on a natural lake), or a fully impounded stream or river (i.e., a reservoir). We explicitly exclude: sewage treatment ponds, aquaculture ponds, and detention ponds that are known to contain basins that are entirely artificial and were built for high-intensity human use. In addition, due to

1  
2  
3  
4 319 their unusual nature and size, we do not include the five Great Lakes in our database. This definition of  
5 320 'lake' for LAGOS-NE has been developed only for the purpose of this database and its applications (e.g.,  
6 321 to answer questions about lake water quality). The intent of LAGOS-NE is not to document and measure  
7 322 the total number of water bodies in our study area, although we are able to perform this calculation for  
8 323 lakes  $\geq 4$  ha, with an acceptable level of uncertainty (see below).

9 324 Definition of lake watersheds: We calculated lake watersheds as 'inter-lake watersheds' (IWSs)  
10 325 defined as the area of land draining directly into the lake as well as the area that drains into upstream-  
11 326 connected streams and lakes  $< 10$  ha (Figure 3). We defined lake watersheds this way to define the  
12 327 drainage basin of lakes that includes connected streams and their drainage basins. However, because  
13 328 research has shown that large upstream lakes can trap nutrients flowing into them, these large lakes can  
14 329 block nutrient transport of nutrients that originate upstream of them to downstream lakes in a connected  
15 330 lake chain (e.g., [22]). Therefore, to calculate a drainage basin for a lake with large upstream connected  
16 331 lakes, we did not include the drainage basins of upstream lakes  $> 10$  ha. See Soranno et al. [17] for full  
17 332 details on how lake IWSs were calculated and the section on LAGOS-NE<sub>GEO</sub> for further details.

18 333 Lakes near and beyond the state borders: For some of our analyses, we delineated boundaries in  
19 334 other ways than political boundaries that were more ecologically relevant, which resulted in the inclusion  
20 335 of some lakes outside of the exact 17 state border. This fact allowed us to include more in situ data  
21 336 collected by state and citizen sampling programs which do not always follow strict state borders and may  
22 337 include lakes that are outside of state lines. Although most of these border lakes have hydrological (i.e.,  
23 338 lake connectivity measures) and topographic (i.e., lake watershed delineations) calculations or water  
24 339 quality data, some measures of ecological context may be missing. For example, for lakes in Canada, we  
25 340 were not able to estimate any data that relied on national datasets that stopped at the Canadian border; one  
26 341 exception is the NHD, which extends into Canada to retain hydrologic boundaries.

#### 30 342 **Data sources of the LAGOS-NE<sub>LOCUS</sub> module**

31 343 Detailed information on data sources are found in 'Additional File 5' in Soranno et al. [17]. Briefly, the  
32 344 data source for lakes and streams in the 17 state area was the NHD [21]. The hydrologic boundaries (i.e.,  
33 345 for three of the spatial classifications, HUC12, HUC8, HUC4) came from the Watershed Boundary  
34 346 Dataset (WBD; [23]). In addition, we used the digital raster dataset of elevation for watershed delineation  
35 347 from the National Elevation Dataset [24]. All download dates for these data sources are provided in  
36 348 'Additional File 5' in the above citation.

#### 37 349 **Data-integration methods of the LAGOS-NE<sub>LOCUS</sub> module**

38 350 All methods to create this module are described in Soranno et al. [17]. The most challenging and time-  
39 351 consuming part of building this module was connecting the sampling locations from the lake water  
40 352 quality datasets (which each contained different types of unique identifiers, and sometimes only lake  
41 353 names) to a georeferenced location in the NHD. When data providers included the lake latitude and  
42 354 longitude, we were able to mostly automate the procedure. Nevertheless, even when coordinates were  
43 355 available, there were many cases where the latitude and longitude did not intersect the NHD lake polygon  
44 356 boundary, requiring manual interpretation.

45 357  
46 358  
47 359  
48 360  
49 361 **Figure 3. Examples lake watersheds (IWS) in LAGOS-NE.** The watersheds are coded by hydrologic class to  
50 362 which its lake belongs. Data are from the LAGOS-NE<sub>GEO</sub> v.1.01 data module and the GIS data coverages.

#### 51 363 52 364 53 365 54 366 **Quality Control of the LAGOS-NE<sub>LOCUS</sub> module**

55 367 The full description of error analysis for this module is described in Soranno et al. [17]. However,  
56 368 here we briefly describe our efforts to determine the minimum area of a lake that we could confidently  
57 369 represent using the NHD (further details located in Additional File 9 in Soranno et al. [17]). Although the

NHD is a national dataset, it is updated and edited regionally (often at the state level) by local practitioners familiar with each study region. As a result, there are regional differences in the resolution and digitization of water bodies, particularly for small water bodies, making it difficult to quantify or document even nominal error rates, or rather, the minimum lake size that is well-represented in the NHD. It has been documented previously that the NHD may not successfully identify small water bodies due to a variety of reasons including the resolution of the original underlying data of the NHD database, errors in digitization, hydrologic changes since the time of map creation (e.g., [25, 26]). Because of these documented issues, some programs have set minimum lake area cutoffs for sampling lakes. Most notable is the EPA-National Lakes Assessment of 2007, which chose a minimum size of 4 ha; although a smaller size cutoff was chosen for the EPA-National Lakes Assessment of 2012 [27]. To determine an appropriate size cutoff for our purposes, we conducted an analysis to identify the lakes that are best represented by the NHD across the LAGOS-NE study area.

We selected four states (WI, MI, IA, ME) in which to evaluate error rates of water body identification for lakes  $\geq 1$  ha and seven states (WI, MI, IA, ME, MO, NH, OH) in which to evaluate error rates for lakes  $\geq 4$  ha. We randomly selected three 100 km<sup>2</sup> rectangles from each state then compared the number of lakes occurring in the NHD GIS coverage to the number of lakes in the best available aerial imagery from a range of sources to calculate the percentage of lakes missing from the NHD. The average percentage of lakes missing from the NHD was 58% for the  $\geq 1$  ha four-state test and 13% for the  $\geq 4$  ha seven-state test. Because an average of 87% of lakes  $\geq 4$  ha that are present in high-resolution aerial imagery are also present in the NHD, we chose this surface area as our cut-off and accepted this error rate.

#### **Data in the LAGOS-NE<sub>LOCUS</sub> module**

Figure 1 shows the census population of all lakes  $\geq 4$  ha in the 17-state area, including border areas beyond the 17-state boundary. As expected, the lakes are not evenly distributed, with higher densities in the northern parts of the study area. For those lakes with known lake depth (9,808 lakes with maximum depth values, and 4,090 lakes with mean depth values), there is little regional pattern of lake depth; shallow and deep lakes are found throughout the study area (see [28] for further details). Watershed size varies greatly across the study extent, reflecting the wide range of different lake hydrologic types and connections to upstream water bodies (Figure 3). In fact, the proportion of lakes in different lake hydrologic connectivity classes varies regionally across our study extent (Table 2; see [29] for further details).

**Table 2. Numbers of lakes in each state by lake hydrologic class**

| State         | Lakes $\geq 4$ ha (#) | Isolated Lakes (#) | Headwater lakes (#) | Drainage lakes (#) | Drainage lakes with upstream lakes (#) |
|---------------|-----------------------|--------------------|---------------------|--------------------|----------------------------------------|
| Connecticut   | 770                   | 40                 | 119                 | 424                | 187                                    |
| Illinois      | 2,831                 | 1,417              | 279                 | 952                | 183                                    |
| Indiana       | 1,883                 | 760                | 244                 | 697                | 182                                    |
| Iowa          | 915                   | 339                | 87                  | 402                | 87                                     |
| Maine         | 2,661                 | 94                 | 619                 | 1,211              | 737                                    |
| Massachusetts | 1,716                 | 210                | 269                 | 751                | 486                                    |
| Michigan      | 6,531                 | 2,649              | 1,087               | 1,672              | 1,123                                  |
| Minnesota     | 14,031                | 6,609              | 1,894               | 2,673              | 2,855                                  |
| Missouri      | 1,865                 | 435                | 179                 | 1,113              | 138                                    |
| New Hampshire | 1,118                 | 70                 | 224                 | 581                | 243                                    |
| New Jersey    | 1,148                 | 219                | 129                 | 521                | 279                                    |
| New York      | 4,477                 | 629                | 1,210               | 1,915              | 723                                    |
| Ohio          | 1,282                 | 543                | 105                 | 520                | 114                                    |
| Pennsylvania  | 1,757                 | 316                | 397                 | 840                | 204                                    |
| Rhode Island  | 266                   | 35                 | 40                  | 115                | 76                                     |
| Vermont       | 531                   | 14                 | 74                  | 364                | 79                                     |
| Wisconsin     | 6,026                 | 2,982              | 823                 | 1,236              | 985                                    |
| <b>Total</b>  | <b>49,808</b>         | <b>17,361</b>      | <b>7,779</b>        | <b>15,987</b>      | <b>8,681</b>                           |

1  
2  
3  
4 404 The number of lakes  $\geq 4$  ha in each of the lake hydrologic classes by state, as well as the total numbers of lakes by  
5 405 hydrologic class calculated for the study extent. Note, in this table, lakes are counted for each state in which they  
6 406 occur (i.e., lakes that straddle two states are counted in both states).

## 7 407 **5. Description of LAGOS-NE<sub>LIMNO</sub> v1.087.1 data module**

8 408

9 409 The LAGOS-NE<sub>LIMNO</sub> module includes in situ measurements of lake water quality. We included  
10 410 variables that are most commonly measured by state agencies and researchers for studying eutrophication  
11 411 (Figure 2, variables labelled as **Water quality variables**). For each water quality data value, we also  
12 412 include metadata as additional columns in the exported data table (Figure 2, variables labelled as  
13 413 **Metadata**) including: the date of the sample, the name of the sampling program, the analytical methods,  
14 414 qualifiers with data flags from the original program (*qual*, which is not standardized for LAGOS-NE),  
15 415 detection limits (if available), and standardized censor codes from our quality control procedures  
16 416 (*censorcode*, standardized for LAGOS-NE).  
17 417

### 18 418 Data sources of the LAGOS-NE<sub>LIMNO</sub> module

19 419 We acquired individual water quality datasets for LAGOS-NE<sub>LIMNO</sub> by contacting individuals at  
20 420 each of the 17 state and 5 tribal agencies. These contacts helped us to identify the state-agency collected  
21 421 dataset required by the Clean Water Act and which is most likely to be in the public domain. In this way,  
22 422 we were able to acquire at least one (and typically more) dataset from each of the 17 states. Because state  
23 423 and tribal agencies vary in sampling approach and intensity (see below for details), we sought to  
24 424 supplement these datasets with other known sources of water quality data, including university  
25 425 researchers, federal agencies, and non-profit groups to integrate into the LAGOS-NE<sub>LIMNO</sub> module. The  
26 426 full list of data sources acquired is in Soranno et al. [17] in ‘Additional File 17’; however, we  
27 427 incorporated a subset of these datasets in LAGOS-NE<sub>LIMNO</sub> v1.087.1 (the data file  
28 428 *LAGOSNE\_source\_program\_10871.csv* contains the list of sources for this version of LAGOS-NE).  
29 429

### 30 430 Data-integration methods of the LAGOS-NE<sub>LIMNO</sub> module

31 431 All methods to create this module are described in Soranno et al. [17]. Briefly, for each dataset acquired,  
32 432 we authored LAGOS-NE metadata in EML to aid in data provenance (included in this paper). We also  
33 433 incorporated key metadata features (e.g., methods used, censor codes (if applicable)), and sampling  
34 434 program information) into the database so that future users could easily identify these important  
35 435 attributes. Because each dataset was unique in structure, file format, and naming conventions, we  
36 436 manually processed each dataset and its metadata so that they could be translated into the standard  
37 437 LAGOS-NE vocabulary and data model. Although labor-intensive, we created customized R scripts to  
38 438 process and load each dataset separately (included in this data paper).  
39 439

### 40 440 Quality control of the LAGOS-NE<sub>LIMNO</sub> module

41 441 The full description of our QAQC procedures for this module are described in Additional File 2. Here, we  
42 442 provide a brief overview of our approach. Our goal for this effort was to identify egregiously high values  
43 443 and values that might be too low, both defined below. Note that our quality control procedures were not  
44 444 designed to identify statistical outliers, which individual users are expected to perform themselves  
45 445 because such analyses depend on the subsequent statistical analysis of each user. There were three major  
46 446 phases in the quality assurance/quality control (QAQC) procedure for LAGOS-NE<sub>LIMNO</sub>. Phases I and II  
47 447 were designed to identify the egregious values that we defined as those that: 1) did not make ecological  
48 448 sense, 2) were far beyond what has been detected in previous studies, 3) were not technically feasible  
49 449 (e.g., SRP > TP), or 4) were a result of a data or file corruption or error in the data loading stage. For these  
50 450 egregious values, we explored the issues that might be underlying the values and removed them from the  
51 451 LAGOS-NE<sub>LIMNO</sub> data export provided in this data paper because we had sufficient evidence that they  
52 452 were not scientifically valid data values. We were very conservative in these assessments to avoid  
53 453 removing data values that were high, yet still valid. Phase III was designed to identify and flag values that  
54 454 were lower than analytically possible (i.e., below detection limits) when there was sufficient metadata;  
55  
56  
57  
58  
59  
60  
61  
62  
63  
64  
65

1  
2  
3  
4 455 however, note that these data are still provided in this data paper because it is not appropriate to remove  
5 456 data that are below detection.

6 457 For all versions of LAGOS-NE<sub>LIMNO</sub>, Phase I and II are conducted on the entire cumulative  
7 458 dataset to leverage as large of a sample size as possible to detect problem values. In other words, because  
8 459 many of the QAQC analyses outlined here make use of all information from an individual lake or  
9 460 variable, incorporating new data may result in a better assessment of the data than when there is less data.  
10 461 Thus, for each new version of LAGOS-NE<sub>LIMNO</sub>, new decisions are made about egregious values. In this  
11 462 data paper and this document, we describe the procedures for assessing all major versions of LAGOS-  
12 463 NE<sub>LIMNO</sub>, but we present the results only for this version of LAGOS-NE<sub>LIMNO</sub> (v1.087.1).

13 464 Because there are few accepted practices for conducting such quality control on a large,  
14 465 integrated database, we created our own procedures for Phase I and II by creating tests to identify  
15 466 egregious values that leverage a large, integrated database with multiple measures of water quality and  
16 467 well-established expected relationships among variables. The database that we used to identify egregious  
17 468 values was based on data in the full LAGOS-NE<sub>LIMNO</sub> database for samples taken from all lake depths  
18 469 provided by the source datasets (note, our data exports in this data paper are only for epilimnetic or  
19 470 surface samples). While the quality control procedures that we implemented here were designed to help  
20 471 resolve the large and egregious errors in a combined dataset such as this, there are likely additional  
21 472 extreme values in the database due to the size and heterogeneity of the data. Users may want to check for  
22 473 additional issues in the data values specific to their proposed analyses.  
23 474

#### 24 475 **Data in the LAGOS-NE<sub>LIMNO</sub> module**

25 476 All data in LAGOS-NE<sub>LIMNO</sub> v1.087.1 are from samples that we identified as being collected  
26 477 from either the lake surface or the epilimnion (the well-mixed surface layer of a thermally-stratified lake  
27 478 during the period of stratification). Because we did not have lake temperature data to quantify the exact  
28 479 epilimnion depth in all lakes, we used information from the source datasets to either determine epilimnion  
29 480 depth, or to select data from only the top water layers. Although we received data from different depths in  
30 481 lakes, the majority of the samples were from the surface or epilimnion. The database includes samples  
31 482 from any season of the year. However, most of the published analyses to date have focused on the  
32 483 summer stratified period.

33 484 Lakes are not sampled the same way by all individuals, groups, or agencies; there are differences  
34 485 in the variables measured, the frequency and timing of sampling, and the proportion of lakes sampled. For  
35 486 example, for total phosphorus, the four states with the largest number of unique lakes with at least one  
36 487 value for total phosphorus per state include: Wisconsin (1,920 lakes), Minnesota (1,588), New York  
37 488 (1,289), and Michigan (1,109) (Table 3). However, the states with the highest proportion of their lakes  
38 489 with total phosphorus samples are the smaller states with fewer numbers of lakes, such as New  
39 490 Hampshire (64%), Vermont (58%), and Rhode Island (42%). Notably, there are some states with  
40 491 intermediate numbers of lakes that still have quite large percentages of their lakes with total phosphorus  
41 492 values, including Maine (35% of 2,645 lakes), Wisconsin (32% of 6,009 lakes), and New York (29% of  
42 493 the 4,461 lakes).

43 494 The most commonly measured variable in LAGOS-NE<sub>LIMNO</sub> is water clarity measured as Secchi  
44 495 depth (a relatively easy and cost-effective measure of water quality), with 897,724 measurements taken  
45 496 from 12,034 unique lakes in the 17 states from mostly the mid 1980s to 2011 (Table 3). The second and  
46 497 third most sampled measures of water quality are chlorophyll *a* and total phosphorus, respectively.  
47 498 Although it appears that total nitrogen is sampled far less frequently than total phosphorus, some labs  
48 499 measure total nitrogen directly and report that single value, whereas other labs measure the constituents  
49 500 that make up total nitrogen (total Kjeldahl nitrogen and nitrate+nitrite), and sum them together to  
50 501 calculate total nitrogen. All of our analyses conducted on total nitrogen have used such calculated and  
51 502 measured values of nitrogen together, which increase the sample sizes for total nitrogen markedly.

52 503 Most of our data came from state agencies, either alone or as part of joint programs with citizen  
53 504 scientists or university researchers (Table 4); which highlights the importance of citizen science programs  
54 505 for monitoring lake water quality in this lake-rich area of the U.S.  
55  
56  
57  
58  
59  
60  
61  
62  
63  
64  
65

14  
15  
16  
17  
18  
19  
20 506  
21 507  
22

**Table 3. Summary of the water quality variables and the number of values per variable by state.**

| State         | Number of lakes (≥4 ha) | Variable            | Total phosphorus | Secchi depth | Chlorophyll a | True color | Apparent color | Dissolved organic carbon | Total nitrogen | Total Kjeldahl nitrogen | Nitrate + nitrite |
|---------------|-------------------------|---------------------|------------------|--------------|---------------|------------|----------------|--------------------------|----------------|-------------------------|-------------------|
| Connecticut   | 763                     | # of samples:       | 1294             | 1943         | 1160          | 53         | 0              | 74                       | 853            | 55                      | 397               |
|               |                         | # of sampled lakes: | 143              | 168          | 149           | 37         | 0              | 49                       | 99             | 26                      | 81                |
|               |                         | sample years:       | 1972-2010        | 1937-2010    | 1937-2013     | 1984-2007  | n/a            | 1984-2007                | 1973-2010      | 1999-2009               | 1976-2010         |
| Illinois      | 2819                    | # of samples:       | 2816             | 2317         | 1438          | 20         | 0              | 20                       | 43             | 1526                    | 2351              |
|               |                         | # of sampled lakes: | 191              | 185          | 167           | 17         | 0              | 17                       | 18             | 155                     | 188               |
|               |                         | sample years:       | 1999-2011        | 1999-2011    | 2000-2011     | 2007       | n/a            | 2007                     | 2001-2009      | 1999-2006               | 1999-2009         |
| Indiana       | 1874                    | # of samples:       | 1232             | 1303         | 909           | 57         | 0              | 57                       | 57             | 1183                    | 1237              |
|               |                         | # of sampled lakes: | 341              | 340          | 320           | 51         | 0              | 51                       | 51             | 322                     | 341               |
|               |                         | sample years:       | 1988-2010        | 1986-2010    | 1990-2009     | 2007       | n/a            | 2007                     | 2007           | 1988-2009               | 1988-2009         |
| Iowa          | 903                     | # of samples:       | 2873             | 2836         | 2711          | 18         | 0              | 18                       | 2244           | 6                       | 2229              |
|               |                         | # of sampled lakes: | 111              | 111          | 103           | 12         | 0              | 16                       | 111            | 1                       | 111               |
|               |                         | sample years:       | 1997-2011        | 1997-2011    | 1997-2011     | 2007       | n/a            | 2007                     | 2001-2011      | 2008-2009               | 2001-2011         |
| Maine         | 2645                    | # of samples:       | 17314            | 83472        | 12480         | 1927       | 1676           | 3321                     | 1260           | 8                       | 1577              |
|               |                         | # of sampled lakes: | 933              | 1047         | 793           | 601        | 466            | 848                      | 461            | 3                       | 347               |
|               |                         | sample years:       | 1971-2011        | 1952-2011    | 1974-2011     | 1983-2011  | 1972-2011      | 1984-2011                | 1995-2011      | 1978-1993               | 1978-2011         |
| Massachusetts | 1698                    | # of samples:       | 570              | 760          | 326           | 277        | 228            | 300                      | 69             | 69                      | 351               |
|               |                         | # of sampled lakes: | 211              | 249          | 122           | 122        | 89             | 140                      | 37             | 4                       | 132               |
|               |                         | sample years:       | 1978-2013        | 1978-2010    | 1986-2010     | 1984-2013  | 1978-2010      | 1984-2010                | 2000-2010      | 1978-2013               | 1978-2013         |
| Michigan      | 6511                    | # of samples:       | 10143            | 95283        | 12243         | 1811       | 69             | 987                      | 749            | 2651                    | 4850              |
|               |                         | # of sampled lakes: | 1109             | 1233         | 862           | 836        | 69             | 353                      | 200            | 713                     | 948               |
|               |                         | sample years:       | 1965-2013        | 1925-2013    | 1959-2013     | 1973-2010  | 2002-2003      | 1984-2013                | 1959-2011      | 1980-2010               | 1973-2012         |
| Minnesota     | 13984                   | # of samples:       | 10974            | 497646       | 81925         | 406        | 6683           | 3382                     | 7717           | 43054                   | 7725              |
|               |                         | # of sampled lakes: | 1588             | 4118         | 2755          | 253        | 1368           | 811                      | 619            | 2018                    | 1522              |
|               |                         | sample years:       | 1944-2011        | 1938-2012    | 1970-2012     | 1981-2009  | 1949-2011      | 1984-2012                | 1945-2012      | 1944-2012               | 1945-2012         |
| Missouri      | 1858                    | # of samples:       | 11619            | 11794        | 11578         | 27         | 0              | 27                       | 11340          | 0                       | 27                |
|               |                         | # of sampled lakes: | 208              | 207          | 201           | 23         | 0              | 23                       | 207            | 0                       | 23                |
|               |                         | sample years:       | 1978-2013        | 1978-2013    | 1978-2013     | 2007       | n/a            | 2007                     | 1978-2013      | n/a                     | 2007              |
| New Hampshire | 1109                    | # of samples:       | 9289             | 2958         | 154           | 237        | 3044           | 390                      | 22             | 1209                    | 2445              |
|               |                         | # of sampled lakes: | 710              | 618          | 21            | 111        | 603            | 143                      | 17             | 535                     | 704               |
|               |                         | sample years:       | 1975-2013        | 1975-2011    | 1983-2012     | 1984-2010  | 1975-2010      | 1984-2010                | 2004-2010      | 1975-1994               | 1975-2013         |
| New Jersey    | 1143                    | # of samples:       | 421              | 461          | 446           | 27         | 0              | 44                       | 10             | 443                     | 472               |
|               |                         | # of sampled lakes: | 175              | 174          | 157           | 25         | 0              | 36                       | 8              | 157                     | 175               |
|               |                         | sample years:       | 1984-2009        | 1984-2009    | 2005-2009     | 1984-2007  | n/a            | 1984-2007                | 2007           | 2005-2009               | 1984-2009         |
| New York      | 4461                    | # of samples:       | 21356            | 21235        | 21000         | 27297      | 2287           | 13036                    | 8259           | 944                     | 27796             |
|               |                         | # of sampled lakes: | 1289             | 693          | 545           | 1421       | 47             | 1158                     | 258            | 279                     | 1279              |
|               |                         | sample years:       | 1975-2012        | 1975-2012    | 1975-2012     | 1981-2012  | 1984-2011      | 1982-2011                | 1990-2012      | 1981-2010               | 1975-2012         |
| Ohio          | 1279                    | # of samples:       | 377              | 1868         | 1912          | 20         | 0              | 220                      | 1873           | 0                       | 447               |
|               |                         | # of sampled lakes: | 144              | 144          | 137           | 19         | 0              | 44                       | 145            | 0                       | 40                |
|               |                         | sample years:       | 2006-2007        | 1992-2010    | 1992-2010     | 2007       | n/a            | 2006-2010                | 1994-2010      | n/a                     | 1993-2007         |
| Pennsylvania  | 1755                    | # of samples:       | 1170             | 924          | 971           | 163        | 0              | 160                      | 638            | 16                      | 290               |
|               |                         | # of sampled lakes: | 263              | 260          | 160           | 124        | 0              | 124                      | 167            | 2                       | 147               |
|               |                         | sample years:       | 1980-2011        | 1984-2011    | 1980-2011     | 1984-2008  | n/a            | 1984-2007                | 1997-2011      | 1985-2010               | 1980-2010         |

65



14  
15  
16  
17  
18  
19  
20  
21  
22  
23  
24  
25  
26  
27  
28  
29  
30  
31  
32  
33  
34  
35  
36  
37  
38  
39  
40  
41  
42  
43  
44  
45  
46  
47  
48  
49  
50  
51  
52  
53  
54  
55  
56  
57  
58  
59  
60  
61  
62  
63  
64  
65

|              |       |                            |               |               |               |              |              |              |              |              |              |
|--------------|-------|----------------------------|---------------|---------------|---------------|--------------|--------------|--------------|--------------|--------------|--------------|
| Rhode Island | 253   | # of samples:              | 3325          | 18211         | 12195         | 51           | 6            | 65           | 2582         | 0            | 2100         |
|              |       | # of sampled lakes:        | 106           | 107           | 102           | 27           | 1            | 32           | 99           | 0            | 102          |
|              |       | sample years:              | 1984-2010     | 1984-2010     | 1986-2010     | 1984-2007    | 2003-2010    | 1984-2010    | 1992-2010    | n/a          | 1984-2010    |
| Vermont      | 528   | # of samples:              | 13906         | 23894         | 15273         | 1774         | 1542         | 982          | 8            | 194          | 2271         |
|              |       | # of sampled lakes:        | 307           | 301           | 249           | 94           | 82           | 83           | 8            | 2            | 116          |
|              |       | sample years:              | 1977-2010     | 1977-2010     | 1977-2010     | 1981-2010    | 1979-2010    | 1984-2010    | 2007         | 1979-1994    | 1977-2010    |
| Wisconsin    | 6009  | # of samples:              | 45973         | 130819        | 26068         | 4599         | 174          | 4029         | 1932         | 9596         | 9417         |
|              |       | # of sampled lakes:        | 1920          | 2079          | 1024          | 1281         | 1            | 671          | 180          | 1160         | 1216         |
|              |       | sample years:              | 1933-2013     | 1948-2013     | 1933-2013     | 1974-2013    | 1976-1998    | 1977-2013    | 1986-2010    | 1933-2013    | 1965-2013    |
| <b>TOTAL</b> | 49592 | <b># of samples:</b>       | <b>154652</b> | <b>897724</b> | <b>202789</b> | <b>38764</b> | <b>15709</b> | <b>27112</b> | <b>39656</b> | <b>60954</b> | <b>65982</b> |
|              |       | <b># of sampled lakes:</b> | <b>9749</b>   | <b>12034</b>  | <b>7867</b>   | <b>5054</b>  | <b>2726</b>  | <b>4599</b>  | <b>2685</b>  | <b>5377</b>  | <b>7472</b>  |

We include the number of individual values (representing an individual sampling event); the number of unique lakes for which there is at least one data value; and, the earliest and most recent year of sampling, all recorded by state and variable from any time period. Additional variables in LAGOS-NE<sub>LIMNO</sub> v1.087.1, not included in this table, which have relatively low sample sizes include: dissolved Kjeldahl nitrogen, ammonium, nitrite, soluble reactive phosphorus, total dissolved nitrogen, total dissolved phosphorus, total organic carbon, and total organic nitrogen.

14  
15  
16  
17  
18  
19  
20 519  
21 520  
22 521

**Table 4. The number of datasets, data values, and lakes from the different types of sampling programs in LAGOS-NE v1.087.1.**

| Program Type                          | Number of datasets | Number of lakes (≥4 ha) |                    | Total phosphorus | Secchi depth | Chl. a  | True color | Apparent color | Dissolved organic carbon | Total nitrogen | Total Kjeldahl nitrogen | Nitrate + nitrite |
|---------------------------------------|--------------------|-------------------------|--------------------|------------------|--------------|---------|------------|----------------|--------------------------|----------------|-------------------------|-------------------|
| Federal Agency                        | 3                  | 17                      | # of values:       | 419              | 527          | 324     | 229        | 173            | 215                      | 335            | 6                       | 30                |
|                                       |                    |                         | # of unique lakes: | 17               | 17           | 17      | 13         | 15             | 14                       | 16             | 1                       | 9                 |
| Federal Agency/ University            | 2                  | 2                       | # of values:       | -                | 799          | -       | -          | -              | -                        | -              | -                       | -                 |
|                                       |                    |                         | # of unique lakes: | -                | 2            | -       | -          | -              | -                        | -              | -                       | -                 |
| LTER                                  | 3                  | 9                       | # of values:       | 2,346            | 3,529        | 2,567   | -          | -              | 1,872                    | 1,612          | 507                     | 2,396             |
|                                       |                    |                         | # of unique lakes: | 9                | 9            | 5       | -          | -              | 9                        | 9              | 4                       | 9                 |
| National Survey Program               | 5                  | 2,244                   | # of values:       | 2,320            | 2,595        | 243     | 3,689      | 703            | 4,714                    | 431            | -                       | 4,204             |
|                                       |                    |                         | # of unique lakes: | 1,863            | 1,891        | 171     | 13         | 142            | 2,235                    | 398            | -                       | 1,997             |
| Non-Profit Agency                     | 4                  | 44                      | # of values:       | 1,326            | 4,798        | 2,678   | -          | -              | -                        | 214            | 9                       | 908               |
|                                       |                    |                         | # of unique lakes: | 44               | 41           | 28      | -          | -              | -                        | 39             | 1                       | 44                |
| State Agency                          | 33                 | 4,264                   | # of values:       | 34,348           | 42,888       | 29,993  | 16,240     | 5,010          | 14,528                   | 5,359          | 7,220                   | 25,684            |
|                                       |                    |                         | # of unique lakes: | 3,914            | 3,186        | 2,309   | 2,092      | 776            | 1,191                    | 634            | 1,991                   | 3,216             |
| State Agency/ Citizen Monitoring      | 11                 | 7,039                   | # of values:       | 79,390           | 645,650      | 124,766 | 18,010     | 8,630          | 3,195                    | 18,610         | 52,995                  | 27,826            |
|                                       |                    |                         | # of unique lakes: | 3,955            | 6,629        | 4,341   | 1,111      | 1,508          | 786                      | 772            | 3,476                   | 2,782             |
| State Agency/Univ/ Citizen Monitoring | 4                  | 1,835                   | # of values:       | 31,809           | 194,177      | 37,993  | 439        | 1,171          | 1,519                    | 10,844         | -                       | 2,112             |
|                                       |                    |                         | # of unique lakes: | 1,439            | 1,812        | 1,253   | 302        | 393            | 574                      | 712            | -                       | 99                |
| Tribal Agency                         | 5                  | 46                      | # of values:       | 911              | 145          | 905     | 3          | -              | 357                      | 411            | 277                     | 463               |
|                                       |                    |                         | # of unique lakes: | 33               | 3            | 32      | 3          | -              | 11                       | 18             | 5                       | 17                |
| University                            | 17                 | 535                     | # of values:       | 2,273            | 4,412        | 3,939   | 172        | 69             | 723                      | 2,275          | -                       | 2,397             |
|                                       |                    |                         | # of unique lakes: | 326              | 500          | 415     | 151        | 69             | 318                      | 396            | -                       | 171               |

53 522  
54  
55  
56  
57  
58  
59  
60  
61  
62  
63  
64  
65

1  
2  
3  
4 523  
5 524 **Figure 4. Percentage of lakes by lake area with water quality data.** Percentage of census lakes in each lake area  
6 525 bin (top panel) compared to the percentage of census lakes for which there are limnological data for Secchi (second  
7 526 panel), chlorophyll *a* (third panel), and total phosphorus (TP; bottom panel)  
8 527

9 528 Using the three most sampled variables in the dataset (Secchi depth, chlorophyll concentration  
10 529 and total phosphorus), we found that larger lakes were more likely to be sampled for water quality than  
11 530 smaller lakes (Figure 4). This result was expected given the economic and recreational interest in larger  
12 531 lakes, including easier public access. Previous research has already documented this basic pattern in 6 of  
13 532 the states included in LAGOS-NE [30]. Across all states, almost 80% of lakes > 400 ha have water  
14 533 quality data.

15 534 Lakes are also unevenly sampled through time, depending on the variable (Figure 5). Some  
16 535 programs' focus is on long-term monitoring, whereas others are short-term initiatives. Typically, long-  
17 536 term monitoring programs are localized to a few lakes, although there are exceptions (e.g., monitoring for  
18 537 acid rain in the NE in the 1980s-present has resulted in good temporal and spatial coverage for some  
19 538 variables through time and space [31].  
20 539

21 540 **Figure 5. The number of years of water quality data by lake.** The number of years for which at least one sample  
22 541 is taken during the summer stratified season (15 June to 15 September) for: Secchi depth in meters, total phosphorus  
23 542 in µg/L, total nitrogen in µg/L (includes both measured and calculated values), and chlorophyll *a* in µg/L.  
24 543  
25 544

## 26 545 6. Description of LAGOS-NE<sub>GEO</sub> v1.05 data module

27 546 The LAGOS-NE<sub>GEO</sub> module includes information on the ecological context of the census lakes,  
28 547 their watersheds, and their regions. The information provided in the data tables for this module is  
29 548 organized into three main themes in which data are exported into individual tables: CHAG - climate,  
30 549 hydrology, atmospheric deposition of nitrogen and sulfur, and surficial geology; LULC - land use/cover,  
31 550 impervious cover, canopy cover, slope and terrain indices, and dam density; and CONN - lake, stream,  
32 551 and wetland abundance and connectivity measures (Figure 2). We also provide the GIS coverages that  
33 552 include some of the underlying data for this module, including: lake polygons and their hydrologic  
34 553 classifications defined in [17]; wetland polygons and their classification; streams as a line coverage and  
35 554 their classification by stream order; the zones used for this study (state and county; hydrologic units [at  
36 555 the 4, 8 and 12 scales; [32]]); and, lake watersheds (IWS). We also include boundaries of U.S. states and  
37 556 Canadian provinces for mapping.  
38 557

### 39 558 Data sources of the LAGOS-NE<sub>GEO</sub> module

40 559 Detailed information on data sources are found in 'Additional File 5' in Soranno et al. [17].  
41 560 Almost all data sources for this module are from national-scale datasets and thus use standardized  
42 561 methods throughout the study extent.  
43 562

### 44 563 Data-integration methods of the LAGOS-NE<sub>GEO</sub> module

45 564 All methods to create this module are described in 'Additional files 5, 7, 8, 13, and 14' in  
46 565 Soranno et al. [17]. Briefly, we calculated the metrics for this module that describe the ecological context  
47 566 surrounding lakes by developing project-specific GIS tools in the ArcGIS environment, which are  
48 567 referred to as the LAGOS GIS Toolbox (and made available here: [33]). The toolbox outputs multiple  
49 568 individual data tables of calculated values organized by the above three data themes that are then  
50 569 imported into LAGOS-NE<sub>GEO</sub> for different spatial classifications, including values calculated at the level  
51 570 of the individual lake, 100 m and 500 m buffers around each lake, the lake IWS, states and counties,  
52 571 hydrologic units, and ecological drainage units (an ecoregion spatial classification). The unique identifiers  
53 572 for this data module are the zone ID's for each spatial classification for which we calculate these metrics.  
54 573 In other words, we calculate land use around a lake in each of the zones of the many spatial classifications  
55  
56  
57  
58  
59  
60  
61  
62  
63  
64  
65

1  
2  
3  
4 574 in LAGOS-NE. However, the data are exported into individual tables by spatial classification. Therefore,  
5 575 there are different numbers of rows in each table; for example, there are 51,101 rows for the land use  
6 576 metrics calculated for the 100 m lake buffer because there are 51,101 lakes that have a 100 m buffer area,  
7 577 but only 17 rows for the land use metrics calculated for the state spatial classification.  
8  
9 578

#### 10 579 **Quality control of the LAGOS-NE<sub>GEO</sub> module**

11 580 The full description of error analysis for this module is described in ‘Additional file 14’ in Soranno et al.  
12 581 [17]. The quality control procedures for this module included procedures to identify possible errors or  
13 582 improbable values as a result of the extensive automated GIS data processing that creates the LAGOS-  
14 583 NE<sub>GEO</sub> data tables and to correct those problems. We assumed that the original data layers had already  
15 584 gone through extensive quality control by the originators of the datasets. We defined errors and  
16 585 improbable values to be: 1) values that did not make ecological sense; 2) values that were well beyond  
17 586 what has been observed in previous studies; 3) values that are not technically feasible; or, 4) null values  
18 587 that indicate an absence of data, when in fact data exist based on the input data coverages. Note, it was  
19 588 not our intention to remove statistical outliers that may or may not be real/true values. Rather, we  
20 589 conducted procedures on each exported table that included: verifying column headers and units, mapping  
21 590 the exported data to evaluate mapping extent and boundary issues using visual inspection, mapping the  
22 591 data distributions of each value, identifying values that were missing or zero, plotting distributions of the  
23 592 data, ensuring that proportions summed to 100 where relevant, and inspecting univariate plots of metrics  
24 593 that are known to be related (e.g., % urban land use versus % impervious surface).  
25  
26 594

#### 27 595 **Data in the LAGOS-NE<sub>GEO</sub> module**

28 596 This module contains the largest amount of data of any of the modules. For example, Figure 6 shows the  
29 597 wide range of ecological context for the LAGOS-NE study area calculated for three different spatial  
30 598 classifications. For those variables that are measured coarsely (e.g., baseflow, runoff, atmospheric  
31 599 deposition, geology), we calculated variables for only the broader spatial classifications. For example, we  
32 600 did not calculate baseflow for spatial classifications finer than HUC12 because the underlying data for  
33 601 baseflow is estimated on a zone generally coarser than the area of a lake watershed.  
34  
35 602  
36 603  
37 604

38 605 **Figure 6. Example ecological context variables by spatial classification in LAGOS-NE.** The top four panels are  
39 606 zoomed in to selected regions of Minnesota and Wisconsin so that the zone boundaries can be seen. The upper left  
40 607 panel shows stream density in each lake IWS, and the upper right panel shows the percent of connected wetlands in  
41 608 each lake IWS. The middle left panel shows the 2011 percent urban land use/cover in each hydrologic unit code 12  
42 609 (HUC12), and the middle right panel shows the 2011 percent agricultural land use/cover in each hydrologic unit  
43 610 code 12 (HUC12). The lower left panel shows the 2010 nitrogen deposition in each HUC8, and the lower right panel  
44 611 shows the average percent of streamflow that is baseflow in each HUC8.  
45  
46 612  
47 613  
48 614  
49 615  
50 616  
51 617  
52  
53  
54  
55  
56  
57  
58  
59  
60  
61  
62  
63  
64  
65

## 7. Research to date using LAGOS-NE

Prior versions of this database have supported numerous peer-reviewed publications to date. In particular, LAGOS-NE is ideally suited for studying the local to regional controls of water quality through both space and time because of the large of number of lakes with in situ water-quality measurements and its wide gradients of ecological context. The lake census dataset also makes it possible to quantify the types of biases present in the dataset to assess the potential influence of uneven sampling efforts on results across both space and time. Below, we describe the types of research questions that have been and are being addressed using LAGOS-NE, organized according to three main topics related to studying water quality across space and time in thousands of lakes. We have published 10 articles using portions of this database, and 13 articles are in review or preparation presently.

### Methods and database development for macrosystems ecology:

Several of our lines of research have required the development of novel methods and the application of existing methods in novel ways. Much of the impetus for this work on methods and database development has been driven by two needs. The first, was to further develop the database--i.e., creating derived and predicted data as a new data product that is publicly accessible (e.g., [28]). The second was to better understand the spatial and temporal distribution of data contained in LAGOS-NE and to further our understanding of important ecological attributes of lakes across multiple spatial scales. These two needs are not mutually exclusive--analyses that have helped contribute data to LAGOS-NE have also addressed important ecological questions.

Three data gaps were identified early during database development including: (1) a lack of lake depth information (lake depth drives many in-lake processes), (2) the need to develop a flexible method for creating ecological regions from multi-themed mapped data, which are often used in macroscale research to account for broad-scale patterns and processes and, (3) the need for developing ways to measure freshwater connectivity to account for the transport and processing of materials in lakes at broad scales. For the first gap, Oliver et al. [28] used a linear mixed model to predict lake depth for lakes where in situ measurements were lacking, allowing the relationship between surface area and lake depth to vary by region because of the strong regional differences in this relationship. Predictions in some regions were far better than other regions, potentially due to differences in underlying geomorphology. To address the second gap, Yuan et al. [34] developed a novel spatially constrained spectral clustering algorithm that balances geospatial homogeneity and region contiguity, to delineate ecological regions. Cheruvilil et al. [35] has since applied this clustering algorithm across the 17 state study region and tested the ability of newly developed regions to capture variation in lake nutrients and water clarity. Finally, to address the third gap, Fergus et al. [29] developed approaches for determining freshwater connectivity of lakes, streams, and wetlands across broad spatial extents. The resulting freshwater metrics and analysis provide insight into the spatial distribution of surface-water connectivity types across the LAGOS-NE study area and provide LAGOS-NE users with novel metrics of connectivity for use in future research.

A further challenge in large, integrated databases such as LAGOS-NE is the well-known problem with data derived from analytical methods related to the issue of detection limits [36]. Stow et al. (in prep) studied the in situ concentrations that were too low to be quantified by standard analytical practices — measurements that are termed left-censored or below a detection limit of an analytical method. Unfortunately, detection limits were only sometimes reported (although, we do include those data in LAGOS-NE<sub>LIMNO</sub> where available). In some cases, low values were flagged as being censored, with an explanation as to the reason for censoring the data value, but in other cases the reason for censoring was not clear. In some instances, patterns in the data suggested that ad hoc substitutions for censored observations may have occurred without clear documentation. Stow et al. (in prep) describe a statistical approach that can be used to accommodate left-censored data during macroscale statistical analyses. This work also led to refining how censored observations were reported in LAGOS-NE, which have been incorporated into all later versions of LAGOS-NE<sub>LIMNO</sub>, including v1.087.1.

1  
2  
3  
4 667 Lake water quality is affected by many ecological context features, such as lake physical  
5 668 characteristics, land cover, land use, and climate. The relationship between these features and the water-  
6 669 quality measurements is not always linear. In addition, the data tend to be noisy and often contain missing  
7 670 values, which makes it challenging to fit effective statistical models. To overcome these challenges, Yuan  
8 671 et al. [37] developed a novel algorithm for learning non-linear features to predict lake water quality. The  
9 672 algorithm also enables the missing values to be imputed in a way that preserves the relationship between  
10 673 the predictors and response variables. Furthermore, because many of the lake water-quality variables are  
11 674 strongly correlated with each other, their models are expected to be similar. This similarity information  
12 675 can thus be exploited to build better models especially for the lake water-quality variables that have very  
13 676 few observations because they are not sampled frequently. Yuan et al. (in prep) are developing a machine  
14 677 learning approach known as multi-task learning that can simultaneously build regression models of  
15 678 multiple lake water-quality variables for a large number of lakes, taking into account both the correlation  
16 679 between the variables and the spatial autocorrelation among the lakes. Because we expect many  
17 680 ecological datasets across broad geographic scales to have similar data gaps and challenges as LAGOS-  
18 681 NE, we think these methods will be extremely valuable for other researchers studying different  
19 682 macroscale questions.  
20 683

21 683  
22 683  
23 684 *Understanding spatial variation in lake nutrients and eutrophication at sub-continental scales:*

24 685 LAGOS-NE allows investigation of spatial variation in lake nutrients and eutrophication at  
25 686 macroscales. For example, Lapierre et al. (in prep) identify general spatial principles that constrain  
26 687 relationships between ecosystem variables with different spatial structures. In other cases, specific  
27 688 questions regarding spatial patterns have focused on identifying important landscape controls on nutrients  
28 689 and their ratios [38], potential stress induced on phytoplankton communities by high nitrogen levels  
29 690 (Filstrup et al. in prep), and spatial autocorrelation in lake-specific relationships between chlorophyll and  
30 691 nutrients and carbon [39]. In addition, LAGOS-NE contains a wealth of information on a variety of lake  
31 692 ecosystem types. Shallow lakes, in particular, are very abundant across the study area and represent  
32 693 systems that can exhibit hysteresis in response to lake eutrophication. Cheruvelil and Wagner (in prep) are  
33 694 investigating the spatial distribution and temporal dynamics of water clarity in shallow lakes of the  
34 695 LAGOS-NE study area.  
35 696

36 696 An important area of research, and one that was a motivating factor for the creation of LAGOS-  
37 697 NE, is understanding the importance of cross-scale interactions (CSIs) — where ecological processes  
38 698 operating at one spatial or temporal scale interact with processes operating at another scale — in lake  
39 699 ecosystems. Because of their importance ecologically and the challenge of quantifying them over large  
40 699 spatial extents, Wagner et al. [40] evaluated the statistical power of large multi-thematic, multi-scaled  
41 700 datasets, such as LAGOS-NE, to detect CSIs. This work not only helped inform the design of large-scale  
42 701 studies aimed at detecting CSIs, but also focused attention on the importance of considering CSI effect  
43 702 sizes and their ecological relevance.. To extend this work, Fergus et al. (in prep) are investigating the  
44 703 importance of both within- and cross-scale interactions in landscape models predicting lake nutrients, and  
45 704 the role that connectivity among freshwaters plays in these interactions. Understanding and predicting  
46 705 nutrients in lakes at macroscales is important to inform estimates of lake contributions to continental and  
47 706 global nutrient cycles. To date, much of this work has been performed on a nutrient-by-nutrient basis,  
48 707 despite knowing that cycles of nitrogen and phosphorus and other key elements are best understood by  
49 708 considering multiple elements in tandem, *e.g.*, in a stoichiometric framework [41] or through analysis of  
50 709 coupled biogeochemical cycles (*e.g.*, [42, 43, 44]). Currently, efforts are underway to develop spatial joint  
51 710 nutrient distribution models to evaluate how our understanding of landscape-scale drivers of lake  
52 711 nutrients and predictive performance are improved by considering multiple nutrients simultaneously  
53 712 (multivariate models) compared to traditional univariate approaches that ignore that nutrient cycles can be  
54 713 tightly coupled in freshwaters (Wagner et al. in prep).  
55 714  
56 715  
57 716  
58 717  
59 718  
60 719  
61  
62  
63  
64  
65

1  
2  
3  
4 718 Understanding temporal and spatial variation in lake eutrophication at sub-continental scales:

5 719 In addition to the vast spatial data contained in LAGOS-NE, temporal data are available for many  
6 720 water-quality variables, and some of the ecological context variables (e.g., land use/cover and  
7 721 atmospheric deposition). This is important information within the context of understanding and predicting  
8 722 how lake ecosystems have and will respond to global change, such as changes in climate and land use,  
9 723 and management activities to reduce nutrient inputs to lakes. Because we do not expect responses to such  
10 724 change and actions to be the same everywhere, these questions must be addressed across both space and  
11 725 time. In particular, recent environmental changes and management efforts have been hypothesized to both  
12 726 improve and degrade water quality in lakes. However, to date, there have been no studies to examine  
13 727 these issues comprehensively across broad scales and to examine which drivers are most strongly related  
14 728 to eutrophication status in lakes. LAGOS-NE is very well suited to answer these types of questions.

15 729 For example, nearly 3,000 lakes were examined for trends in nutrients and chlorophyll from 1990  
16 730 to 2013 using LAGOS-NE [45]. Across all lakes, nitrogen has declined, and phosphorus and chlorophyll  
17 731 have not changed. Nitrogen and stoichiometric changes in lakes were related to atmospheric deposition of  
18 732 nitrogen, providing key insight into large-scale nutrient transport and policies such as the Clean Air Act.  
19 733 Using only citizen-science data in a subset of the LAGOS-NE database, Lottig et al. [46] showed results  
20 734 that suggested little evidence for major declines or improvements in water quality. In addition, Collins et  
21 735 al. (in press) are examining the relationships between a wide range of climate metrics and water quality in  
22 736 ~11,000 lakes in LAGOS-NE to determine, 1) which climate metrics are most related to water quality; 2)  
23 737 whether physical, chemical and biological aspects of lakes respond to climate in the same way; and, 3)  
24 738 how the climate-water-quality relationship varies across space and regions with different ecological  
25 739 context. However, the temporal dynamics of lake ecosystem properties can sometimes be nonlinear and  
26 740 exhibit variability across the landscape--largely because of climate and within-lake processes. Lottig et al.  
27 741 (in prep) have developed models for understanding and predicting the often complex temporal patterns  
28 742 observed in water clarity. These studies point to the importance of considering both space and time when  
29 743 trying to understand broad-scale environmental issues in surface waters.  
30 744

31 745  
32 746  
33 747  
34 748  
35 749  
36 750  
37 751  
38 752  
39 753  
40 754  
41 755  
42 756  
43 757  
44 758  
45 759  
46 760  
47 761  
48 762  
49 763  
50 764  
51 765  
52 766  
53 767  
54 768  
55 769  
56 770  
57 771  
58 772  
59 773  
60 774  
61 775  
62 776  
63 777  
64 778  
65 779

## 8. Using LAGOS-NE for future research, management, and policy

To facilitate potential future use of LAGOS-NE, we have thoroughly documented the database and its methods [17]; and, here, we share LAGOS-NE data with the broader research community. In this data paper, we include a wide range of research products, including: the water quality and ecological-context data; the GIS coverages underlying much of the analyses on freshwaters; and, an R package that facilitates use of LAGOS-NE [47]. This package includes functions to retrieve, store, and interact with the LAGOS-NE database that works across many different operating systems. The package should increase the ease with which users of the database are able to access the data and documentation while maintaining a reproducible workflow.

Key motives for constructing this database included interest in examining lake nutrients and productivity at multiple spatial and temporal scales, fostering broad-scale aquatic ecology and macrosystems research in an open-science platform, and providing new understanding and resources for management and policymakers. To this end, several team members have made presentations at scientific meetings about the structure and use of LAGOS-NE and subsets of LAGOS-NE data have been shared with other researchers and stakeholders and agency personnel in advance of this publication. These early uses of LAGOS-NE data by other researchers outside of our team include an investigation of patterns and causes of shifting distribution of a sentinel fish species (Rypel et al. in prep), developing models to simulate lake temperatures (Winslow et al. in prep) and fish species distributions, and developing a recruitment model for a popular game fish (Hansen et al. in prep). Results from the latter two efforts will inform state-level fisheries management as well as aid in prioritization of lakes for habitat conservation action across a tri-state region.

Much of the research that we and others are conducting with LAGOS-NE has implications for ecosystem management or environmental decision-making. In addition, we have collaborated with

1  
2  
3  
4 768 boundary organizations and decision-makers. For example, under development is a dashboard of the  
5 769 ecosystem services provided by lakes for use by land managers (Keeler et al. in prep). In addition, we  
6 770 have helped the state of Michigan determine lake-specific nutrient standards [48]. Our hope is that this  
7 771 database and the associated support tools and documentation serve as a powerful resource and a  
8 772 foundation for future research and decision-making by a broad community of scientists, policy makers,  
9 773 and natural-resource managers. Indeed, our success and experience with database construction and  
10 774 research has inspired us to expand the spatial extent for LAGOS-NE. We have begun to build LAGOS-  
11 775 US, which will include similar data as LAGOS-NE but will be for the continental U.S.  
12 776

## 14 777 **9. Challenges and recommendations for creating large, integrated, and** 15 **heterogeneous databases** 16 778 17 779

18 780 We found that the largest challenge when creating this database was integrating many small  
19 781 heterogeneous datasets that had few common standards. Although creating such large, integrated datasets  
20 782 using fully automated procedures may happen someday, it appears that we are nowhere near such  
21 783 automation today. Until standards in metadata documentation and robust ontologies are created and  
22 784 widely adopted when creating local or regional datasets, future efforts to integrate these into larger  
23 785 databases will have to rely on close collaborations among domain experts and ecoinformatics  
24 786 professionals, extensive manual interpretation of individual datasets, and funds sufficient to implement  
25 787 these labor-intensive approaches [16]. Nevertheless, it is worth the time and money invested in database  
26 788 integration if the resulting databases support new research, management, policy, public outreach, and  
27 789 education at all levels. We anticipate that LAGOS-NE will serve as a foundation for new data modules  
28 790 that can be used beyond the original intent of LAGOS-NE.  
29 791

### 30 791 The economic value of water quality data in an integrated database 31 792

32 793 This extensive effort was supported by a U.S. National Science Foundation grant that totaled \$2.4  
33 794 million, along with resources from other projects. Our team ranged in size from 14-20 individuals across  
34 795 the six years of the project, with many members compiling and integrating data, authoring metadata,  
35 796 creating new data products, and implementing quality control procedures, resulting in a tremendous  
36 797 number of person-hours. However, when one puts the cost of the data collection for the water quality data  
37 798 in the first place, the expense of this post-processing integration work is not as large as it sounds. Sprague  
38 799 et al. [16] suggest that a single sample (estimated for collecting nutrient or chemistry data from streams)  
39 800 ranged in cost from \$2000-\$6000 per sample. If we assume similar rates for lake sampling, but lower the  
40 801 cost as some aspects of lake sampling may be cheaper than stream sampling and multiply that cost  
41 802 (estimated as \$1,000-\$4,000 US) by the total number of records of nutrient or chemical samples in  
42 803 LAGOS-NE (n=589,909), then the combined estimate to collect the water quality data found in LAGOS-  
43 804 NE is in the range of \$0.5 – 2.4 billion US. It cost us between 0.10 - 0.40 % of the cost to sample the data  
44 805 in the first place to harmonize these half a million records, and to build an ecological-context database for  
45 806 them. This relatively small investment in preserving, documenting, and harmonizing these valuable  
46 807 datasets creates the needed infrastructure for new broad-scaled research, management, education, and  
47 808 outreach uses.  
48 809  
49 810

### 50 809 Strategies for broad-scale data-integration efforts: 51 810

52 811 One challenge is to prioritize research areas and to identify the types of datasets that may benefit  
53 812 from a similar type of integration. State, federal, tribal, and citizen-science water quality datasets were an  
54 813 excellent source of quality data for integration and conducting broad-scaled research on aquatic systems.  
55 814 There are likely other such data sources that would benefit from being integrated as we have done here.  
56 815 We recommend the following strategies to make the best use of future data integration efforts.  
57 816  
58 817  
59  
60  
61  
62  
63  
64  
65



1  
2  
3  
4 817 (1) The database integration effort should be driven by key underlying research questions or goals, and  
5 818 grounded in a strong conceptual foundation of the important features to include. In our case, the principles  
6 819 of landscape limnology [18,19,20,12] guided the development of LAGOS-NE which helped us to  
7 820 prioritize geospatial and lake features for inclusion in the database because the addition of any data type  
8 821 or dataset cost time and money.  
9 822

10 823 (2) For databases with more than one major data type, it is very helpful to build the database in modular  
11 824 form, each with its own versioning system, specific data integration methods, and quality control  
12 825 procedures. This strategy was not a primary goal at the outset of our project, but, it emerged somewhat  
13 826 organically through the life of the project. We now recognize the many benefits that the modularity brings  
14 827 to the database, including making it much easier to be dynamic rather than static by providing a platform  
15 828 for the addition of new data, new types of data, and new modules in the future (such as for biological  
16 829 data, or data from high-frequency sensors).  
17 830

18 831 (3) The entire process should be grounded in an open-science framework. Knowing that the database,  
19 832 design, and methods were to be shared and made usable by future users influenced our decisions  
20 833 throughout the process, and made documentation a high priority throughout. Although we are making the  
21 834 full database available now, before this point, we supported open science by publishing subsets of  
22 835 LAGOS-NE data that were used in individual publications (e.g., [49, 50]).  
23 836

24 837 (4) Creation of LAGOS-NE required a strong focus on team science, and in particular the roles of and  
25 838 incentives for early-career researchers in such efforts. This type of research cannot be conducted in a  
26 839 single-investigator mode, but requires a highly collaborative and effective team-based model (e.g., [51,  
27 840 52, 53]). We explicitly considered strategies for ensuring that early-career team members get credit for  
28 841 their contributions [54]. We recommend providing these essential team members with opportunities for  
29 842 leadership, project management, personnel management, and intellectual growth. For example, they can  
30 843 be part of major decisions and can lead smaller efforts throughout the project, as well as be given power  
31 844 to shape team policies and practices. This integration of early-career researchers into the entire research  
32 845 team and effort will give early-career professionals deep knowledge of the database, the procedures, as  
33 846 well as the skills to conduct such work in the future.  
34 847

35 848 (5) The decision how to disseminate the database documentation needs to be considered early in the  
36 849 project. For example, database documentation papers are rare, especially in ecology, but are very  
37 850 important. The dissemination of the documentation and procedural approaches for making this large,  
38 851 integrated, and heterogeneous database had to be published prior to making the database available [17]  
39 852 and prior to publication of research results stemming from LAGOS-NE because methods sections in  
40 853 journal articles are too short to include all the necessary documentation of such methods. Other  
41 854 researchers may be discouraged by the very real consequence that publishing such products take time and  
42 855 energy investments that may slow down production of research publications. However, such a paper was  
43 856 instrumental in supporting later research articles that used LAGOS-NE. Therefore, we recommend that  
44 857 this (and other) database documentation papers become a more standard type of paper to describe the  
45 858 extensive methods involved and to supplement data papers. Such papers will facilitate the use, extension,  
46 859 and translation of these databases well into the future, as well as foster future research on broad-scale,  
47 860 complex, and societally-relevant environmental questions.  
48 861

#### 862 **AVAILABILITY OF SUPPORTING DATA**

863 The data sets supporting the results of this article are available in the Ecological Data Initiative repository,  
864 including the following specific components:

- 865 • LAGOS-NE-LOCUS v1.01: [https://portal-](https://portal-s.edirepository.org/nis/mapbrowse?scope=edi&identifier=100)  
866 [s.edirepository.org/nis/mapbrowse?scope=edi&identifier=100](https://portal-s.edirepository.org/nis/mapbrowse?scope=edi&identifier=100)  
867

1  
2  
3  
4  
5  
6  
7  
8  
9  
10  
11  
12  
13  
14  
15  
16  
17  
18  
19  
20  
21  
22  
23  
24  
25  
26  
27  
28  
29  
30  
31  
32  
33  
34  
35  
36  
37  
38  
39  
40  
41  
42  
43  
44  
45  
46  
47  
48  
49  
50  
51  
52  
53  
54  
55  
56  
57  
58  
59  
60  
61  
62  
63  
64  
65

- LAGOS-NE-LIMNO v1.087.1: <https://portal-s.edirepository.org/nis/mapbrowse?scope=edi&identifier=101>
- LAGOS-NE-GEO v1.05: <https://portal-s.edirepository.org/nis/mapbrowse?scope=edi&identifier=99>
- An R package to access the data in this paper: <https://github.com/cont-limno/LAGOS>
- GIS coverages of the freshwater features that are linked to the data tables: <https://portal-s.edirepository.org/nis/mapbrowse?scope=edi&identifier=98>
- Individual water quality datasets and associated metadata for LAGOS-NE<sub>LIMNO</sub>: *See additional File 1.*

## DECLARATIONS

### List of abbreviations

LAGOS-NE – LAke multi-scaled GeOSpatial and temporal database for the 17 Northeastern and Midwest U.S. states  
GIS – Geographic Information System  
US-EPA – United States Environmental Protection Agency  
EML – Ecological Metadata Language  
USGS – United States Geological Survey  
NHD – National Hydrography Dataset  
WBD – Watershed Boundary Dataset  
IWS – Interlake Watershed  
SRP – Soluble Reactive Phosphorus  
TP – Total Phosphorus  
TN – Total Nitrogen  
DOC – Dissolved Organic Carbon  
MAV – Maximum Allowable Value  
TDN – Total Dissolved Nitrogen  
IQR – Interquartile Range  
LULC – Land Use Land Cover  
CONN – Connectivity and abundance (lake, stream, and wetland)  
CHAG – Climate, Hydrology, Atmospheric deposition of nitrogen and sulfur, and surficial Geology  
HUC – Hydrologic Unit Code  
CSI – Cross Scale Interactions

### Competing interesting

The authors declare they have no competing interests

### Funding

The creation of LAGOS-NE was supported by:

The National Science Foundation MacroSystems Biology Program in the Emerging Frontiers Division of the Biological Sciences Directorate (EF-1065786, EF-1638679, EF-1065649, EF-1065818, EF-1638554) and the USDA National Institute of Food and Agriculture, Hatch project 176820 to PAS. KEW thanks the STRIVE Programme (2011-W-FS-7) from the Environmental Protection Agency, Ireland. SMC thanks the NSF Division of Biological Infrastructure (1401954).

1  
2  
3  
4 918 The water quality data that are incorporated into LAGOS-NE were originally funded by the following  
5 919 sources:  
6 920 State of Maine; Michigan Agricultural Experiment Station; Fisheries Division, Michigan Department of  
7 921 Natural Resources; New York State Division of Water Quality; Wisconsin Department of Natural  
8 922 Resources; University of Wisconsin-Madison; State/Trust; Michigan State University Agriculture  
9 923 Experimental Station Disciplinary Research Grant Program; US EPA; US EPA Section 106/319 Grants;  
10 924 Tribal General Fund; U.S. Army Corps of Engineers Federal Lakes Operation & Maintenance Funds;  
11 925 Aquatic Plant Management Society; Aquatic Ecosystem Restoration Foundation; Michigan State  
12 926 University; Michigan State University Department of Fisheries and Wildlife; EPA Star Fellowship to  
13 927 K.S.C. (U-915342-01-0); Andrew W. Mellon Foundation; Federal Aid in Sport Fish Restoration Program  
14 928 (Grant F-69-P, Fish Management in Ohio) administered jointly by the U.S. Fish and Wildlife Service and  
15 929 the Ohio Department of Natural Resources, Division of Wildlife; Iowa Department of Natural Resources  
16 930 (Contract #ESD04HALFasch110155); Minnesota Pollution Control Agency; NSF-Division of  
17 931 Environmental Biology; Ohio DNR Division of Wildlife; University of Rhode Island Watershed Watch;  
18 932 NSF Kellogg Biological Station Long Term Ecological Research (LTER) Program, DEB 1027253; NSF  
19 933 North Temperate Lakes LTER Program, DEB 1440297; Lac du Flambeau Band and Bureau of Indian  
20 934 Affairs; Indiana Department of Environmental Management; Missouri Department of Natural Resources;  
21 935 Clean Water Act Section 16; Michigan Department of Environmental Quality; Massachusetts Water  
22 936 Supply Protection Trust; US EPA Clean Air Markets Division (LTM Network); US EPA Office of  
23 937 Research and Development; New York City Department of Environmental Protection (NYSDEP); City of  
24 938 New York; USGS Water Availability and Use Science Program (WAUSP); U.S. Geological Society;  
25 939 New York State Energy Research and Development Authority; National Institute of Food and  
26 940 Agriculture, U.S. Department of Agriculture, Hatch Grant 1003732; the New York State Department of  
27 941 Environmental Conservation; Lake Sunapee Protective Association; National Oceanic and Atmospheric  
28 942 Administration; Gull Lake Quality Organization; Clean Michigan Initiative; NSF grant DEB-1455461.  
29  
30  
31  
32  
33  
34

#### 35 945 **Authors' contributions**

36 946 Data for the database were contributed by: LCB, MB, KEB, MGB, MTB, SRC, JWC, KSC, MC, JDC,  
37 947 JAD, JD, CTF, CSF, MJG, LTG, JDF, SKH, PCH, EH, CH, JRJ, KJH, LLJ, WWJ, JRJ, CMK, SAK, BL,  
38 948 JAL, YL, NRL, JAL, LJM, WHM, KEBM, PBN, SJN, MLP, DCP, AIP, DMP, POR, DOR, KMR, LGR,  
39 949 OS, NJS, PAS, NRS, EHS, JLS, JMT, TPT, MV, GW, KCW, KEW, JDW, and MKW. The idea to create  
40 950 the database was conceived by PAS and KSC. PAS coordinated the different activities across team-  
41 951 members to build LAGOS-NE. The database was designed by EGB, PNT, CG, and PAS; and, created and  
42 952 managed by EGB. The following authored metadata for the individual water quality data sets using  
43 953 information provided by the data providers: MTB, CKB, KSC, SMC, CEF, CTF, ENH, NRL, SKO, NKS,  
44 954 PAS, EHS, and KEW. CEF prepared the integrated LAGOS-NE metadata, and developed the protocols  
45 955 for authoring the EML metadata; and, CEF and CKB created EML metadata for the 87 water quality data  
46 956 sets. SKO wrote the final variables definitions for the integrated metadata. CG helped to prepare the  
47 957 needed metadata and documentation for loading the data in the data repository. Code for importing the  
48 958 datasets into the database was written by EGB, STC, NRL, and SY. NJS and SBS performed geospatial  
49 959 analyses and created the LAGOS-GIS Toolbox. The conceptual foundation for measuring freshwater  
50 960 connectivity was led by CEF. SBS developed the methods to delineate lake watersheds. The quality  
51 961 control methods development and analysis on LAGOS-NE<sub>LIMNO</sub> were conducted by NRL; the quality  
52 962 control of LAGOS-NE<sub>GIS</sub> was led by CES and SMC, and conducted by CES, SMC, CEF, NKS, and  
53 963 KEW. The quality control of LAGOS-NE<sub>LOCUS</sub> was conducted by EGB. Many authors who were part of  
54 964 the database integration team wrote the technical documentation; JFL served as editor of these technical  
55 965 documents. Tables and figures were prepared by SMC, KBSK, JFL, NRL, ACP, NKS and PAS and  
56 966 edited by many of the contributing authors. SKO and JJS wrote the LAGOS-NE R package. NJS prepared  
57 967 the GIS data and its corresponding metadata. PAS coordinated the writing of the manuscript, and major  
58  
59  
60  
61  
62  
63  
64  
65

1  
2  
3  
4  
5  
6  
7  
8  
9  
10  
11  
12  
13  
14  
15  
16  
17  
18  
19  
20  
21  
22  
23  
24  
25  
26  
27  
28  
29  
30  
31  
32  
33  
34  
35  
36  
37  
38  
39  
40  
41  
42  
43  
44  
45  
46  
47  
48  
49  
50  
51  
52  
53  
54  
55  
56  
57  
58  
59  
60  
61  
62  
63  
64  
65

968 parts of the manuscript were written by: PAS, KSC, SMC, JFL, NRL, SKO, JJS, EHS, PNT, TW, and  
969 SY. After the lead author, authors are listed alphabetically.

970  
971 **Competing Interests**

972 The authors declare that they have no competing interests

973  
974 **Acknowledgments**

975 We thank the contributions over the past several decades of many hundreds to thousands of governmental,  
976 tribal and citizen scientists whose efforts from lake sampling to water quality analysis to dataset  
977 compilation enabled LAGOS-NE to become a reality and a resource for the future. Specifically, we  
978 dedicate this paper to the memory of Jody Connor, whose three decades of innovative and science-driven  
979 lake management while working for the New Hampshire Department of Environmental Services  
980 generated meaningful contributions to the protection and restoration of lake quality and to lasting data  
981 legacies such as volunteer monitoring in the state. This is Great Lakes Environmental Research  
982 Laboratory contribution number 1863. Any use of trade, firm, or product names is for descriptive  
983 purposes only and does not imply endorsement by the US Government.

1  
2  
3  
4 988  
5 989 **References**

- 6 990 1. Carpenter SR, Caraco NR, Correll DL, Howarth RW, Sharpley AN, Smith VH. Nonpoint  
7 991 pollution of surface waters with phosphorus and nitrogen. *Ecological Applications*. 1998;  
8 992 8:559-568.
- 9 993 2. Jaworski NA, Howarth RW, Hetling LJ. Atmospheric Deposition of Nitrogen Oxides  
10 994 onto the Landscape Contributes to Coastal Eutrophication in the Northeast United States.  
11 995 *Environmental Science and Technology* 1997; 31:1995–2004.
- 12 996 3. Bennett EM, Carpenter SR, Caraco NF. Human Impact on Erodible Phosphorus and  
13 997 Eutrophication: A Global Perspective. *BioScience*. 2001; 51:227-234.
- 14 998 4. Schindler DW. Recent advances in the understanding and management of eutrophication.  
15 999 *Limnology and Oceanography*. 2006; 51: 356–363.
- 16 1000 5. Taranu ZE and Gregory-Eaves I. Quantifying relationships among phosphorus,  
17 1001 agriculture, and lake depth at an inter-regional scale. *Ecosystems*. 2008; 11: 715-725.
- 18 1002 6. Filstrup CT, Wagner T, Soranno PA, Stanley EH, Stow CA, Webster KE, Downing JA.  
19 1003 Regional variability among nonlinear chlorophyll-phosphorus relationships in lakes.  
20 1004 *Limnology and Oceanography*. 2014; 59: 1691-1703. doi: 10.4319/lo.2014.59.5.1691.
- 21 1005 7. McCrackin ML, Jones HP, Jones PC, Moreno-Mateos D. Recovery of lakes and coastal  
22 1006 marine ecosystems from eutrophication: A global meta-analysis. *Limnology and*  
23 1007 *Oceanography*. 2016; 62:507-518. doi: 10.1002/lno.10441.
- 24 1008 8. Paerl HW, Otten TG, Joyner AR. Moving towards adaptive management of cyanotoxin-  
25 1009 impaired water bodies. *Microbial Biotechnology*. 2016; 9:641-651. doi: 10.1111/1751-  
26 1010 7915.12383.
- 27 1011 9. Schindler DW, Carpenter SR, Chapra SC, Hecky RE, Orihel, DM. Reducing Phosphorus  
28 1012 to Curb Lake Eutrophication is a Success. *Environmental Science & Technology*.  
29 1013 2016; 50:8923-8929. doi: 10.1021/acs.est.6b02204.
- 30 1014 10. Fergus CE, Soranno PA, Cheruvilil KS, Bremigan MT. Multiscale landscape and  
31 1015 wetland drivers of lake total phosphorus and water color. *Limnology and Oceanography*.  
32 1016 2011; 56:2127-2146. doi: 10.4319/lo.2011.56.6.2127.
- 33 1017 11. Soranno PA, Cheruvilil KS, Bissell EG, Bremigan MT, Downing JA, Fergus CE,  
34 1018 Filstrup CT, Henry EN, Lottig NR, Stanley EH, Stow CA, Tan P-N, Wagner  
35 1019 T, Webster KE. Cross-scale interactions: quantifying multi-scaled cause–effect  
36 1020 relationships in macrosystems. *Frontiers in Ecology and the Environment*. 2014; 12:65–  
37 1021 73.
- 38 1022 12. Read EK, Patil VP, Oliver SK, Hetherington AL, Brentrup JA, Zwart JA, Winters KM,  
39 1023 Corman JR, Nodine ER, Woolway RL, Dugan HA, Jaimes A, Santoso AB, Hong GS,  
40 1024 Winslow LA, Hanson PC, Weathers KC. The importance of lake-specific characteristics  
41 1025 for water quality across the continental United States. *Ecological Applications*. 2015;  
42 1026 35:943-955. doi: 10.1890/14-0935.1.
- 43 1027 13. Smith VH, Dodds WK, Havens KE, Engstrom DR, Paerl HW, Moss B, Likens GE.  
44 1028 Comment: Cultural eutrophication of natural lakes in the United States is real and  
45 1029 widespread. *Limnology and Oceanography*. 2014; 59: 2217-2225.
- 46 1030 14. McDonald CP, Lottig NR, Stoddard, JL, Herlihy AT, Lehmann S, Paulsen SG, Peck DV,  
47 1031 Pollard AI, Stevenson RJ. Comment on Bachmann et al. (2013): A non-representative  
48 1032 sample cannot describe the extent of cultural eutrophication of natural lakes in the United  
49 1033 States. *Limnology and Oceanography*. 2014; 59: 2226-2230.
- 50  
51  
52  
53  
54  
55  
56  
57  
58  
59  
60  
61  
62  
63  
64  
65

1  
2  
3  
4  
5  
6  
7  
8  
9  
10  
11  
12  
13  
14  
15  
16  
17  
18  
19  
20  
21  
22  
23  
24  
25  
26  
27  
28  
29  
30  
31  
32  
33  
34  
35  
36  
37  
38  
39  
40  
41  
42  
43  
44  
45  
46  
47  
48  
49  
50  
51  
52  
53  
54  
55  
56  
57  
58  
59  
60  
61  
62  
63  
64  
65

15. Stoddard JL, Sickle JV, Herlihy AT, Brahney J, Paulsen S, Peck DV, Mitchell R, Pollard AI. Continental-Scale Increase in Lake and Stream Phosphorus: Are Oligotrophic Systems Disappearing in the United States? *Environmental Science and Technology*. 2016; 50(7):3409-3415. doi: 10.1021/acs.est.5b05950.
16. Sprague LA, Oelsner GP, Argue DM. Challenges with secondary use of multi-source water-quality data in the United States. *Water Research*. 2017; 100: 252-261.
17. Soranno PA, Bissell EG, Cheruvilil KS, Christel ST, Collins SM, Fergus CE, Filstrup CT, Lapierre JF, Lottig NR, Oliver SK, Scott CE, Smith NJ, Stopyak S, Yuan S, Bremigan MT, Downing JA, Gries C, Henry EN, Skaff NK, Stanley EH, Stow CA, Tan PN, Wagner T, Webster KE. Building a multi-scaled geospatial temporal ecology database from disparate data sources: fostering open science and data reuse. *GigaScience*. 2015; 4:28. doi: 10.1186/s13742-015-0067-4.
18. Magnuson JJ, Kratz, TK. Lakes in the landscape: approaches to regional limnology. *International Association of Theoretical and Applied Limnology*. 2000; 27: 74-87.
19. Wiens JA. Riverine landscapes: taking landscape ecology into the water. *Freshwater Biology*. 2002; 47L501-515. doi: 10.1046/j.1365-2427.2002.00887.x.
20. Soranno PA, Cheruvilil KS, Webster KE, Bremigan MT, Wagner T, Stow CA. Using landscape limnology to classify freshwater ecosystems for multi-ecosystem management and conservation. *BioScience*. 2010; 60:440–454.
21. United States Geological Survey National Hydrography Dataset. Version 9.3. <http://nhd.usgs.gov>. Accessed 4 June 2015.
22. Zhang T, Soranno PA, Cheruvilil KS, Kramer DB, Bremigan MT, Ligmann-Zielinska A. Evaluating the effects of upstream lakes and wetlands on lake phosphorus concentrations using a spatially-explicit model. *Landscape Ecology*. 2012, 27:1015-1030; doi: 10.1007/s10980-012-9762-z.
23. United States Geological Survey Watershed Boundary Dataset. <https://nhd.usgs.gov/wbd.html>. Downloaded in 2013.
24. National Elevation Dataset. <http://ned.usgs.gov/>. Accessed 11 March 2013.
25. US Environmental Protection Agency: National lakes assessment fact sheet. 2010. [http://water.epa.gov/type/lakes/upload/nla\\_survey\\_fact\\_sheet.pdf](http://water.epa.gov/type/lakes/upload/nla_survey_fact_sheet.pdf). Accessed 4 June 2015.
26. US Environmental Protection Agency: National lakes assessment 2012: a fact sheet for communities. 2012. <http://water.epa.gov/type/lakes/assessmonitor/lakessurvey/upload/NLA-2012-Fact-Sheet-for-Communities.pdf>. Accessed 4 June 2015.
27. Environmental Protection Agency: National Lake Survey of 2012. 2012. <https://www.epa.gov/national-aquatic-resource-surveys/nla>. Accessed 4 June 2015.
28. Oliver SK, Soranno PA, Fergus CE, Wagner T, Winslow LA, Scott CE, Webster KE, Downing JA, Stanley EH. Prediction of lake depth across a 17-state region in the United States. *Inland Waters*, 2016 6:314-324; doi: 10.5268/IW-6.3957.
29. Fergus CE, Lapierre JF, Oliver S, Skaff N, Cheruvilil K, Soranno, P, Webster K, Scott C. The freshwater landscape: Lake, wetland, and stream abundance and connectivity at macroscales. *Ecosphere*. 2017; 8:e01911. doi: 10.1002/ecs2.1911
30. Wagner T, Soranno PA, Cheruvilil KS, Renwick WH, Webster KE, Vaux P, Abbitt RJF. Quantifying sample biases of inland lake sampling programs in relation to lake surface area and land use/cover. *Environmental Monitoring and Assessment*. 2007; 141:131-147. doi:10.1007/s10661-007-9883-z.

1  
2  
3  
4  
5  
6  
7  
8  
9  
10  
11  
12  
13  
14  
15  
16  
17  
18  
19  
20  
21  
22  
23  
24  
25  
26  
27  
28  
29  
30  
31  
32  
33  
34  
35  
36  
37  
38  
39  
40  
41  
42  
43  
44  
45  
46  
47  
48  
49  
50  
51  
52  
53  
54  
55  
56  
57  
58  
59  
60  
61  
62  
63  
64  
65

31. Strock KE, Saros JE, Nelson SJ, Birkel SD, Kahl JS, McDowell WH. Extreme weather years drive episodic changes in lake chemistry: Implications for recovery from sulfate deposition and long-term trends in dissolved organic carbon. *Biogeochemistry*. 2016; 127:353–365.

32. Seaber PR, Kapinos FP, Knapp GL. Hydrologic unit maps: U.S. Geological Survey water-supply paper 2294. U.S.G.S. 1987. <http://water.usgs.gov/GIS/huc.html>.

33. Smith NJ, Soranno PA, Stopyak S. LAGOS-NE GIS Toolbox. GitHub repository. 2014. [https://soranno.github.io/LAGOS\\_GIS\\_Toolbox/](https://soranno.github.io/LAGOS_GIS_Toolbox/).

34. Yuan S, Tan PN, Cheruvilil KS, Collins SM, Soranno PA. Constrained Spectral Clustering for Regionalization: Exploring the Trade-off between Spatial Contiguity and Landscape Homogeneity. *Data Science and Advanced Analytics*. 2015. doi:10.1109/DSAA.2015.7344878.

35. Cheruvilil KS, Yuan S, Webster KE, Tan PN, Lapierre JF, Collins SM, Fergus CE, Scott C, Henry E, Soranno PA, Filstrup CT, Wagner T. Creating multi-themed ecological regions for macroscale ecology: Testing a flexible, repeatable and accessible clustering method. *Ecology and Evolution*. 2017. 7: 3046–3058. doi: 10.1002/ece3.2884

36. Helsel DR. *Statistics for censored environmental data using Minitab and R*, 2nd edition. John Wiley and Sons, New York. 2012. <http://www.wiley.com/WileyCDA/WileyTitle/productCd-0470479884.html>.

37. Yuan S, Tan PN, Cheruvilil KC, Fergus CE, Skaff NK, Soranno PA. Hash-Based Feature Learning for Incomplete Continuous-Valued Data. *Proceedings of the 2017 SIAM International Conference on Data Mining*. Houston, Texas. April 27-29, 2017.

38. Collins SM, Oliver SK, Lapierre JF, Stanley EH, Jones JR, Wagner T, Soranno PA. Lake nutrient stoichiometry is less predictable than nutrient concentrations at regional and sub-continental scales. *Ecological Applications*. 2017; 27:1529-1540. doi: 10.1002/eap.1545

39. Fergus CE, Finley AO, Soranno PA, Wagner T. Spatial variation in nutrient and water color effects on lake chlorophyll at macroscales. *PLoS ONE*. 2016; 11(10). doi: 10.1371/journal.pone.0164592

40. Wagner T, Fergus EC, Stow CA, Cheruvilil KS, Soranno PA. The statistical power to detect cross-scale interactions at macroscales. *Ecosphere*. 2016; 7:e01417. doi: 10.1002/ecs2.1417.

41. Sterner RW, Elser JJ. *The Biology of Elements from Molecules to the Biosphere*. Princeton University Press: Princeton and Oxford; 2002.

42. Rastetter, EB. Modeling coupled biogeochemical cycles. *Frontiers in Ecology and the Environment*. 2001; 9: 68-73.

43. Finzi AC, Austin AT, Cleland EE, Frey SD, Houlton BZ, Wallenstein MD. Responses and feedbacks of coupled biogeochemical cycles to climate change: examples from terrestrial ecosystems. *Frontiers in Ecology and the Environment*. 2011; 9:61-67.

44. Finlay JC, Small GE, Sterner RW. Human influences on nitrogen removal in lakes. *Science*. 2013; 342:247-250.

45. Oliver SK, Collins SM, Soranno PA, Wagner T, Stanley EH, Jones JR, Stow CA, Lottig NR. Unexpected stasis in a changing world: Lake nutrient and chlorophyll trends since 1990. *Global Change Biology*. 2017. doi: 10.1111/gcb.13810

1  
2  
3  
4  
5  
6  
7  
8  
9  
10  
11  
12  
13  
14  
15  
16  
17  
18  
19  
20  
21  
22  
23  
24  
25  
26  
27  
28  
29  
30  
31  
32  
33  
34  
35  
36  
37  
38  
39  
40  
41  
42  
43  
44  
45  
46  
47  
48  
49  
50  
51  
52  
53  
54  
55  
56  
57  
58  
59  
60  
61  
62  
63  
64  
65

46. Lottig NR, Wagner T, Henry EN, Cheruvilil KS, Webster KE, Downing JA, Stow CA. Long-Term Citizen-Collected Data Reveal Geographical Patterns and Temporal Trends in Lake Water Clarity. PLoS ONE. 2014; doi: 10.1371/journal.pone.0095769.

47. Stachelek J., Oliver SK. 2017. LAGOS: R interface to the LAke multi-scaled GeOSpatial & temporal database. R package version 1.087.1. <https://github.com/cont-limno/LAGOS>

48. Cheruvilil KS, Soranno P. Developing nutrient criteria in Michigan lakes: Revision, update, and validation of the lake-specific model for establishing expected nutrient conditions in Michigan lakes. Report to the Michigan Department of Environmental Quality. FY2012 205(j). 2015.

49. Oliver SK, Soranno PA, Fergus CE, Wagner T, Winslow LA, Scott CE, Webster KE, Downing JA, Stanley EH. LAGOS – Predicted and observed maximum depth values for lakes in a 17-state region of the U.S. Long Term Ecological Research Network. 2015; doi:10.6073/pasta/f00a245fd9461529b8cd9d992d7e3a2f.

50. Fergus CE, Finley AO, Soranno PA, Wagner T. Spatial variation in nutrient and water color effects on lake chlorophyll at macroscales. Long-Term Ecological Research Network Data Portal. 2016; doi: [10.6073/pasta/0ebd2e4c0705706b77b359955bff44e1](https://doi.org/10.6073/pasta/0ebd2e4c0705706b77b359955bff44e1).

51. Cheruvilil KS, Soranno PA, Weathers KC, Hanson PC, Goring SJ, Filstrup CT, Read EK. Creating and maintaining high-performing collaborative research teams: the importance of diversity and interpersonal skills. *Frontiers in Ecology and the Environment*. 2014; 12:31–38.

52. Weathers KC, Hanson PC, Arzberger P, [Brentrup J](#), Brookes JD, Carey CC, [Gaiser E](#), Hamilton DP, Hong GS, Ibelings B, [Istvánovics V](#), Jennings E, [Kim B](#), [Kratz T](#), Lin FP, [Muraoka K](#), [O’Reilly C](#), [Piccolo C](#), [Ryder E](#), [Zhu G](#). The Global Lake Ecological Observatory Network (GLEON): The Evolution of grassroots network science. *Bulletin of Limnology and Oceanography*. 2013; 22:71-73.

53. Hanson PC, Weathers KC, Kratz TK. Networked lake Science: how the Global Lake Ecological Observatory (GLEON) Works to understand, predict, and communicate lake ecosystem response to global change. *Inland Waters*. 2016; doi: 10.5268/IW-6.4.904.

54. Goring S, Weathers KC, Dodds WK, Soranno PA, Sweet LC, Cheruvilil KS, Kominoski JS, Rüegg J, Thorn AM, Utz RM. Improving the culture of interdisciplinary collaboration in ecology by expanding measures of success. *Frontiers in Ecology and the Environment*. 2014; 14: 39-47.



1  
2  
3  
4  
5  
6  
7  
8  
9  
10  
11  
12  
13  
14  
15  
16  
17  
18  
19  
20  
21  
22  
23  
24  
25  
26  
27  
28  
29  
30  
31  
32  
33  
34  
35  
36  
37  
38  
39  
40  
41  
42  
43  
44  
45  
46  
47  
48  
49  
50  
51  
52  
53  
54  
55  
56  
57  
58  
59  
60  
61  
62  
63  
64  
65

**Figure 1. Map of the study extent of LAGOS-NE.** Map includes 17 states in the upper midwest and northeastern U.S. outlined in white and 51,101 lakes  $\geq 4$  ha shown as blue polygons. Some lakes extend beyond state borders and are included in the database if it was possible to delineate their watersheds. Watershed boundaries rather than state boundaries were used for all analyses of lakes, streams and wetlands. The map is modified from [17].

**Figure 2. LAGOS-NE data modules and version numbers.** The data modules and versions that are included in LAGOS-NE and are available with this paper include: LAGOS-NE<sub>GEO</sub> v.1.05, LAGOS-NE<sub>LOCUS</sub> v.1.01 (note, that in Soranno et al. [17], this module was called LAGOS-lakes), and LAGOS-NE<sub>LIMNO</sub> v.1.087.1. We include descriptions of the type of data that are included in each module; with the major categories of variables the same as those describing the data tables in Additional File 1. The black connectors among the modules show that the modules are connected to each other through common unique identifiers through the LAGOS-NE<sub>LOCUS</sub> module (either the unique lake ID or the zone ID). P is phosphorus, N is nitrogen, C is carbon, S is sulfur, atm is atmospheric, NHD is the National Hydrography Dataset, IWS is the interlake watershed, WBD is the Watershed Boundary Dataset, EDU is Ecological Drainage Unit. Figure is modified from Figure 1 in Soranno et al. [17].

**Figure 3. Examples lake watersheds (IWS) in LAGOS-NE.** The watersheds are coded by hydrologic class to which its lake belongs. Data are from the LAGOS-NE<sub>GEO</sub> v.1.01 data module and the GIS data coverages.

**Figure 4. Percentage of lakes by lake area with water quality data.** Percentage of census lakes in each lake area bin (top panel) compared to the percentage of census lakes for which there are limnological data for Secchi (second panel), chlorophyll *a* (third panel), and total phosphorus (TP; bottom panel)

**Figure 5. The number of years of water quality data by lake.** The number of years for which at least one sample is taken during the summer stratified season (15 June to 15 September) for: Secchi depth in meters, total phosphorus in ug/L, total nitrogen in ug/L (includes both measured and calculated values), and chlorophyll *a* in ug/L.

**Figure 6. Example ecological context variables by spatial classification in LAGOS-NE.** The top four panels are zoomed in to selected regions of Minnesota and Wisconsin so that the zone boundaries can be seen. The upper left panel shows stream density in each lake IWS, and the upper right panel shows the percent of connected wetlands in each lake IWS. The middle left panel shows the 2011 percent urban land use/cover in each hydrologic unit code 12 (HUC12), and the middle right panel shows the 2011 percent agricultural land use/cover in each hydrologic unit code 12 (HUC12). The lower left panel shows the 2010 nitrogen deposition in each HUC8, and the lower right panel shows the average percent of streamflow that is baseflow in each HUC8.

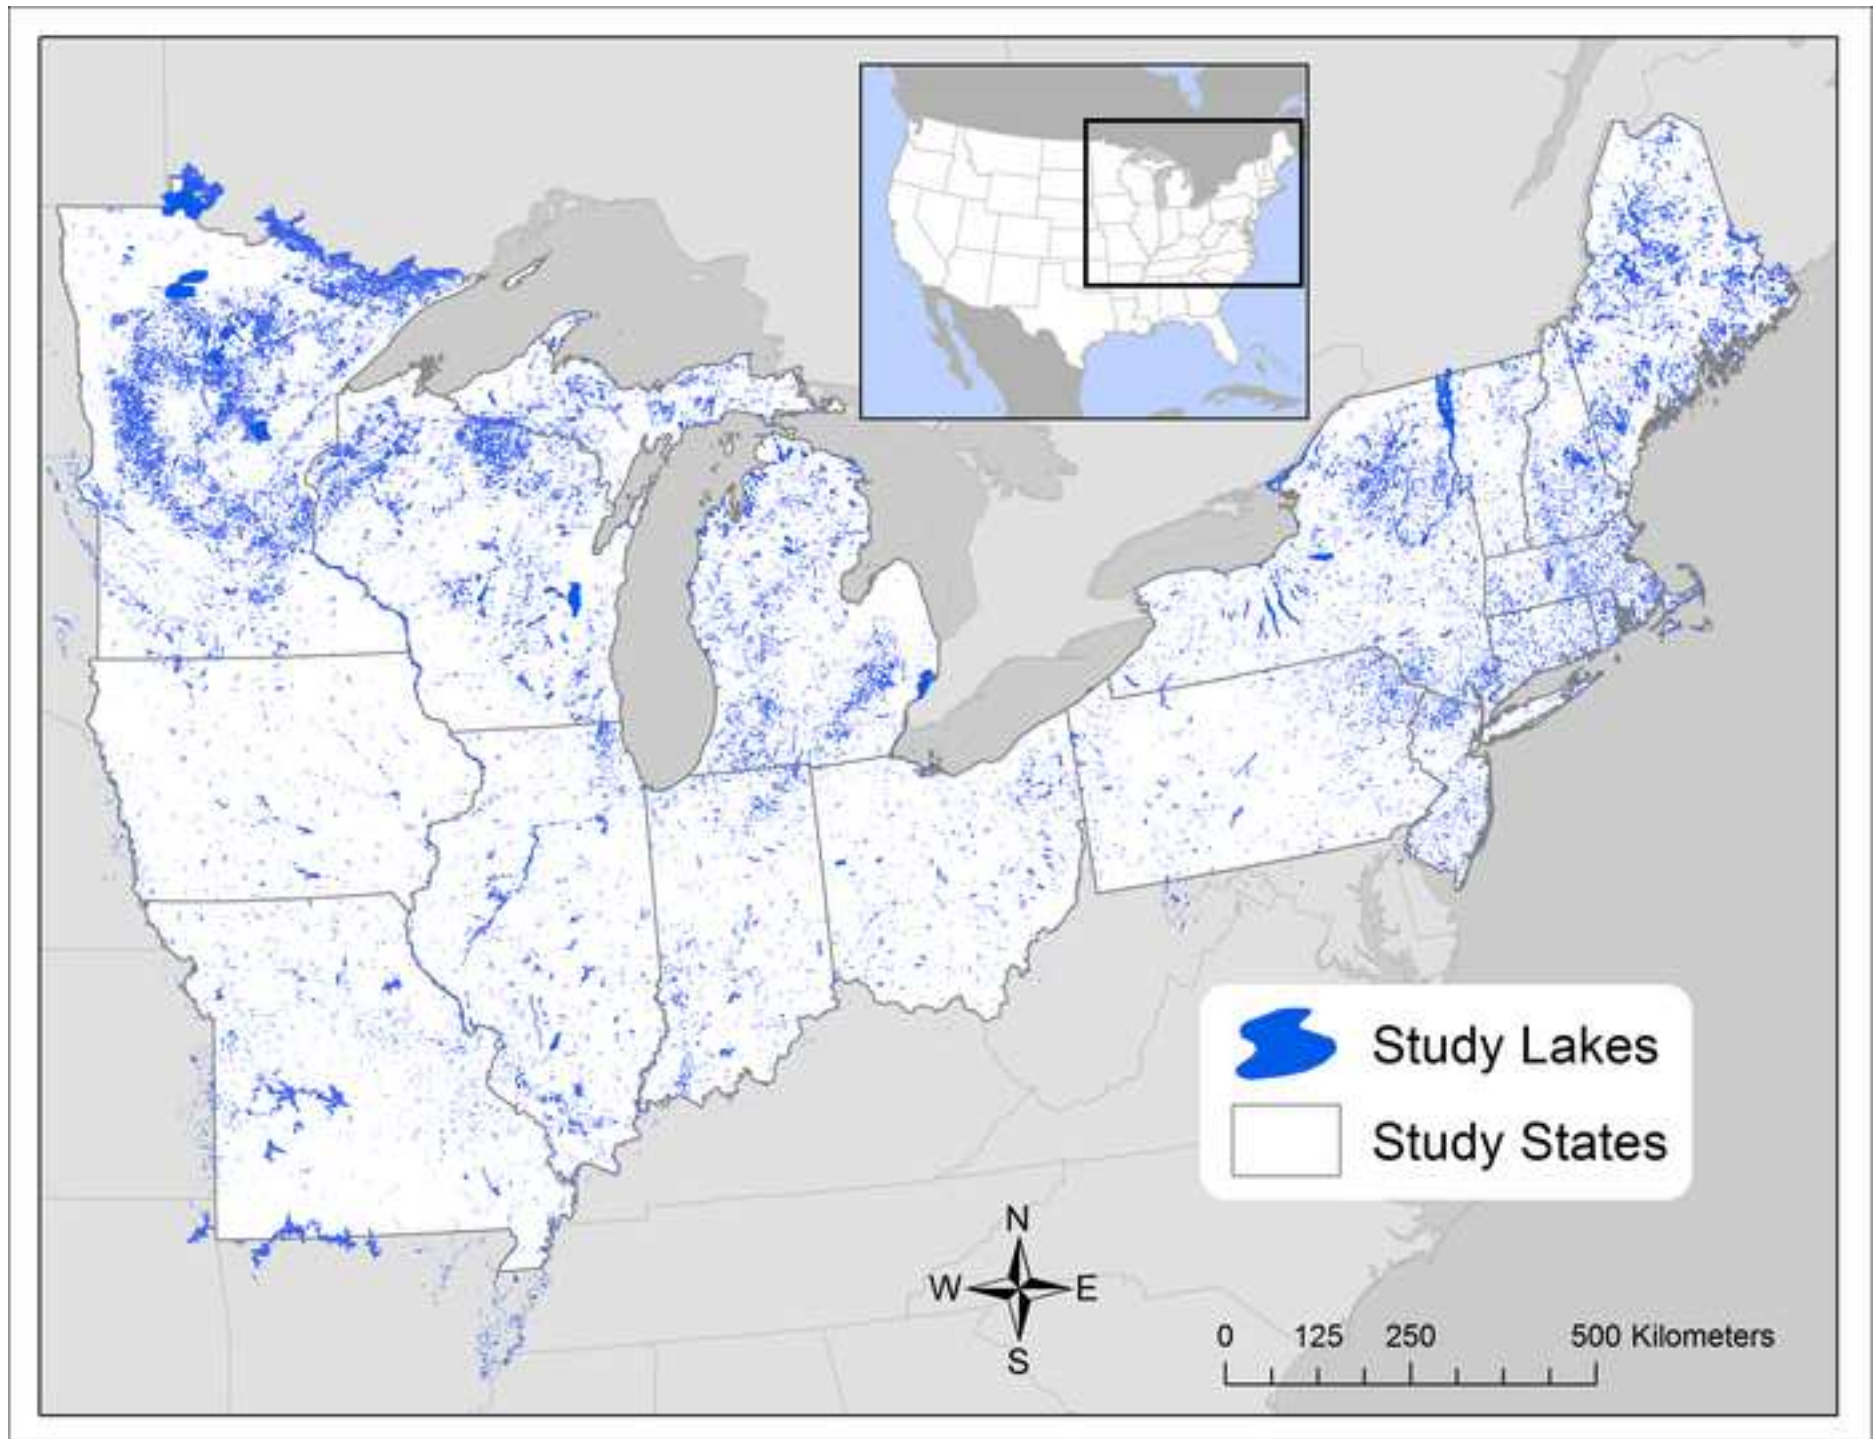

## LAGOS-NE Modules

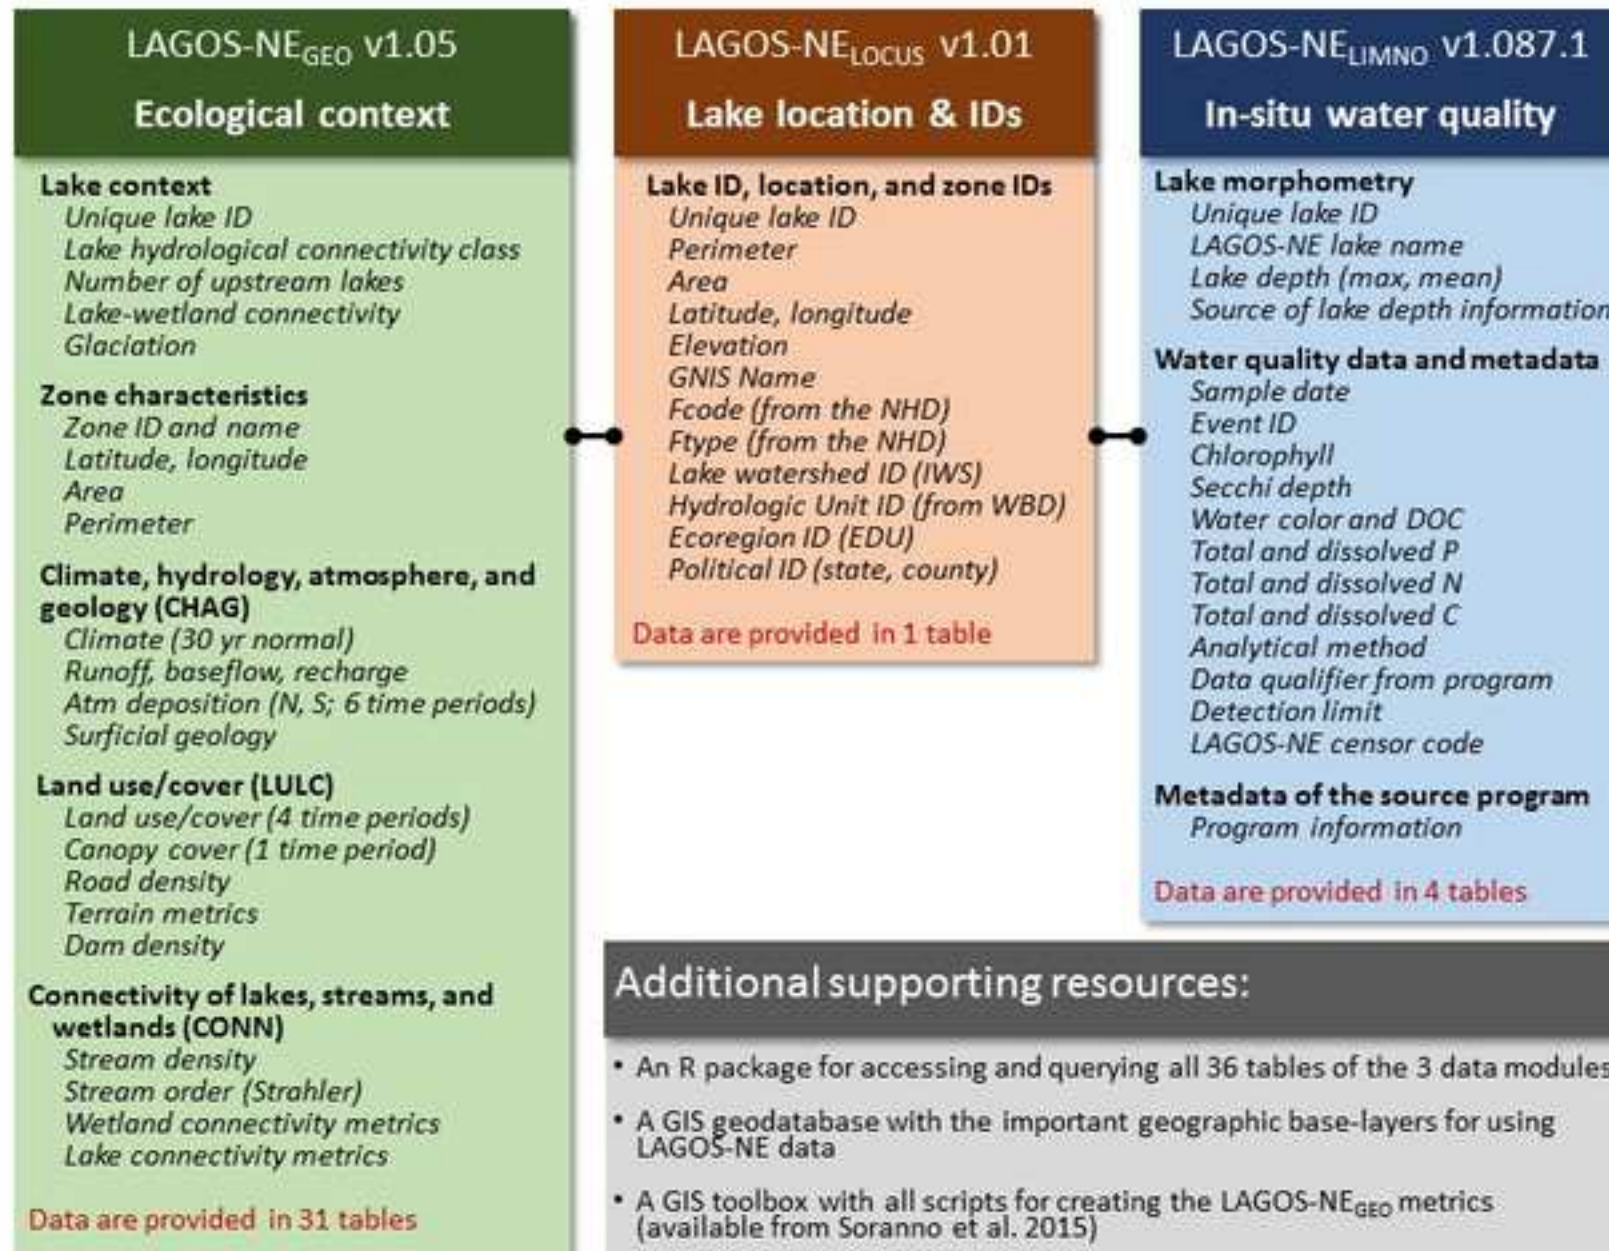

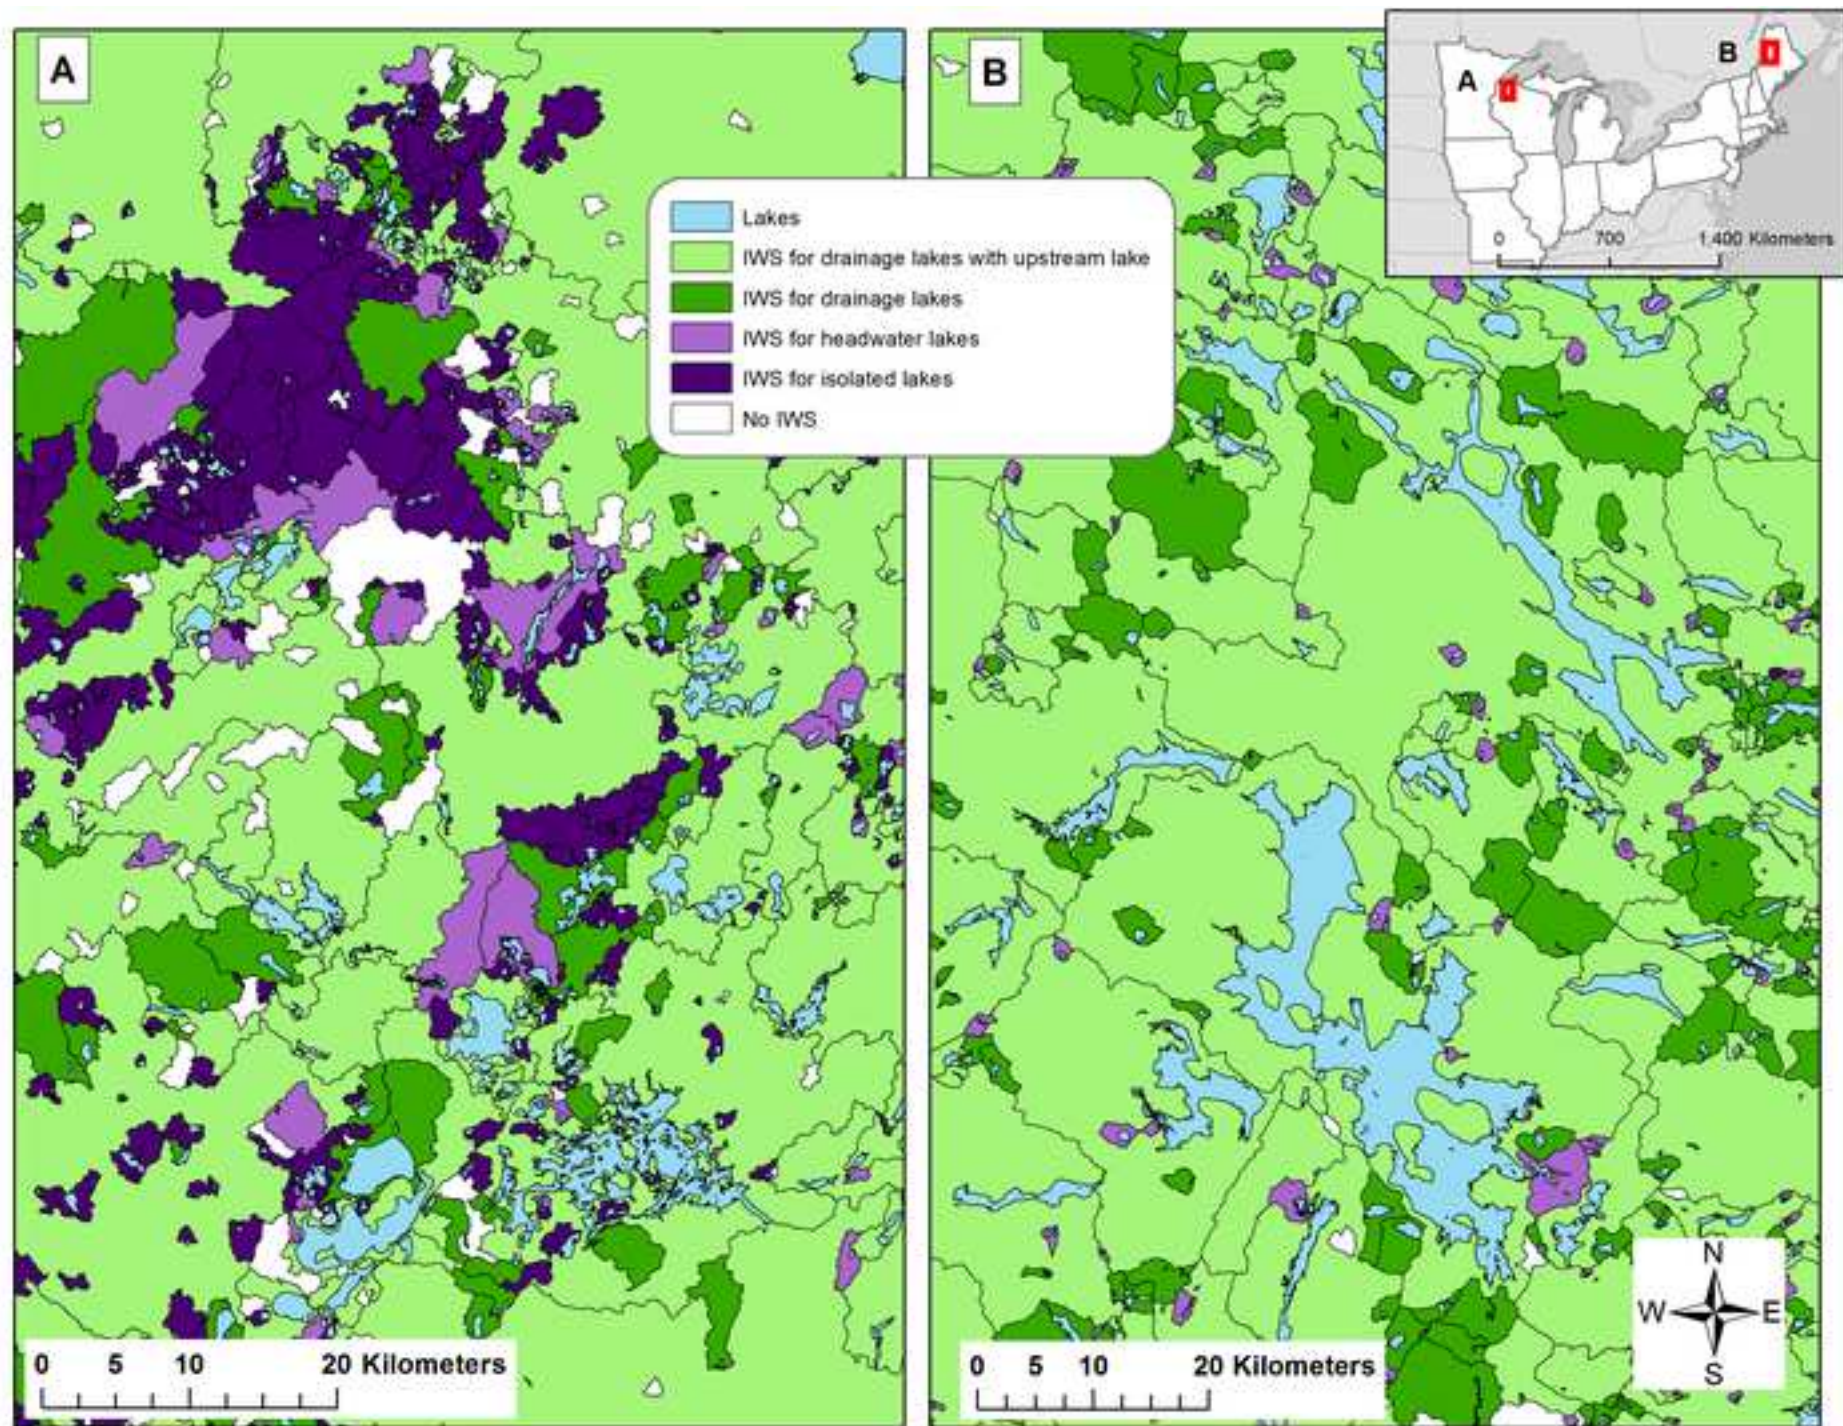

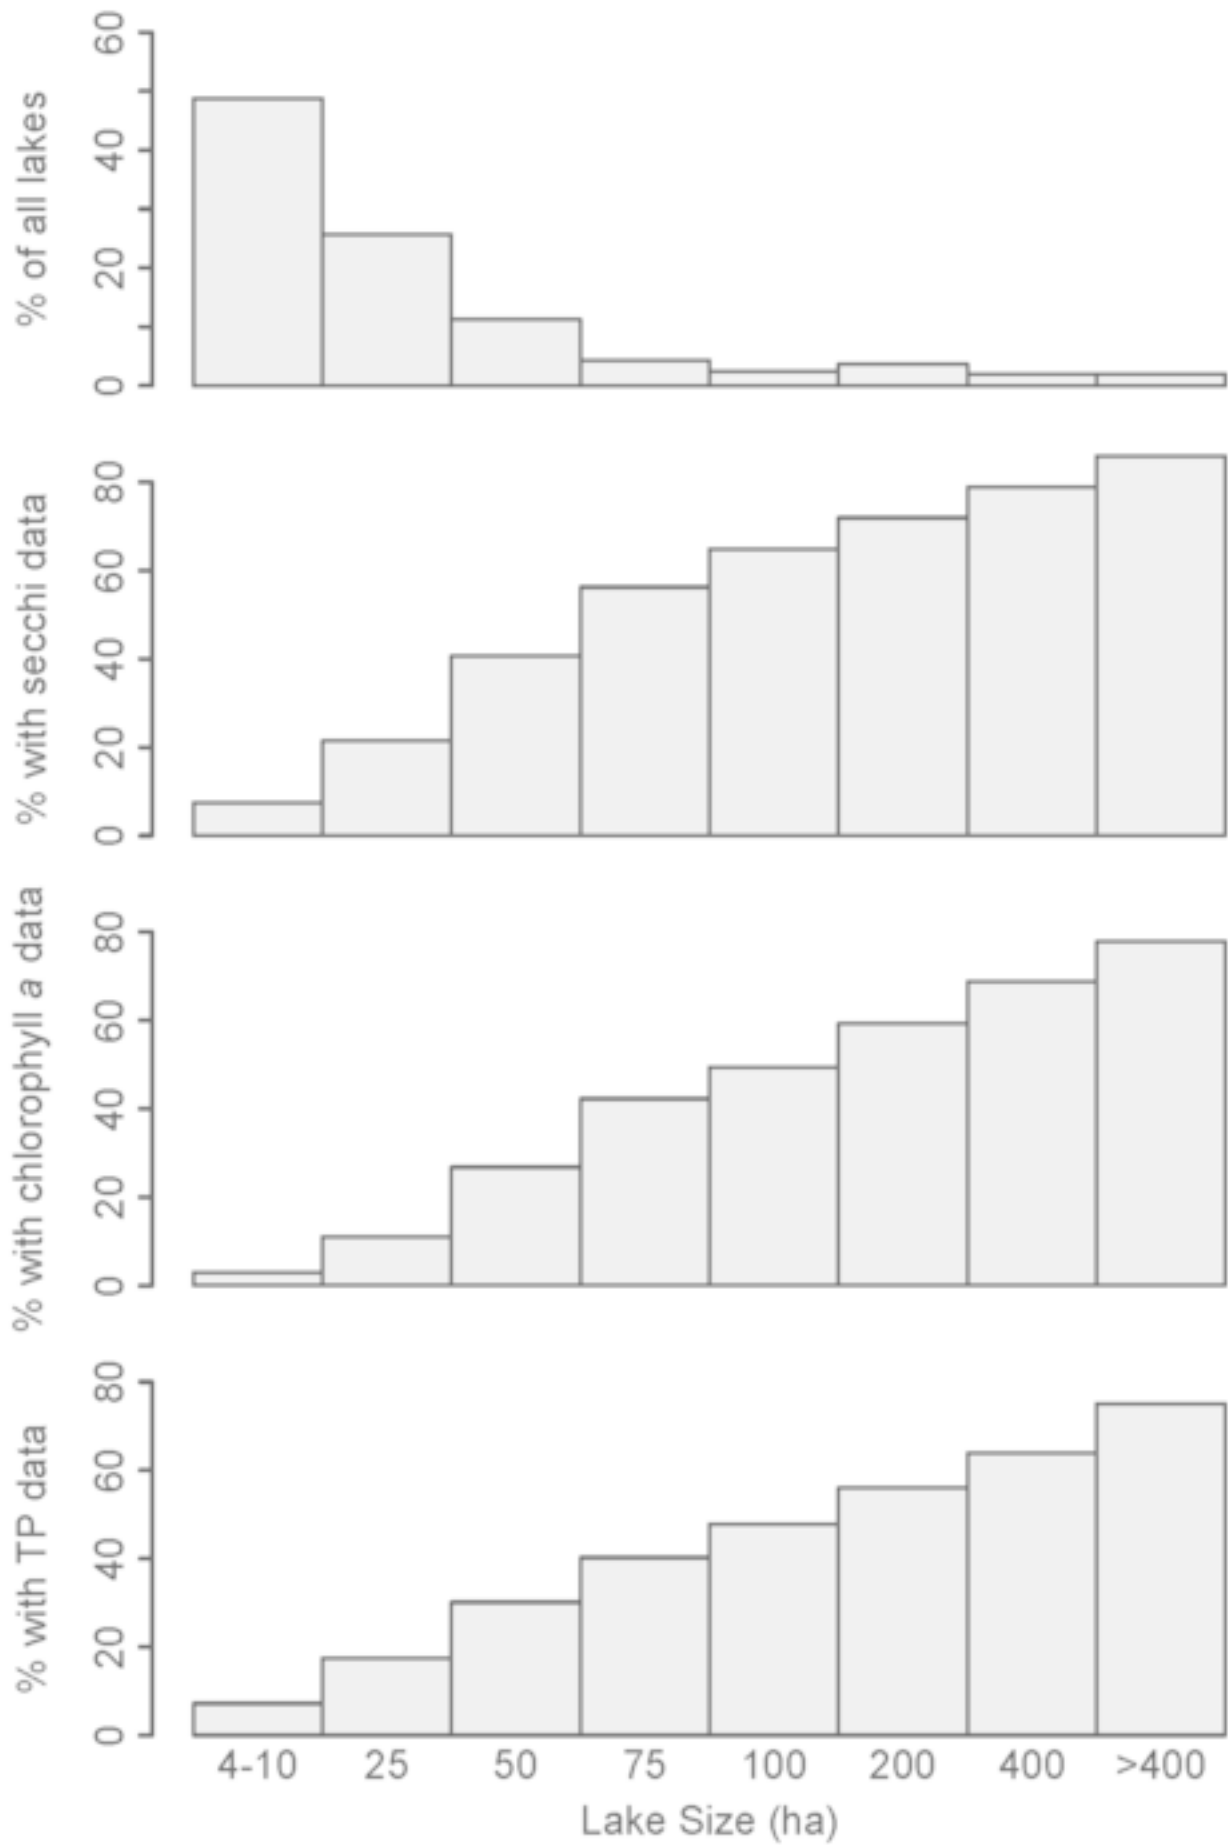

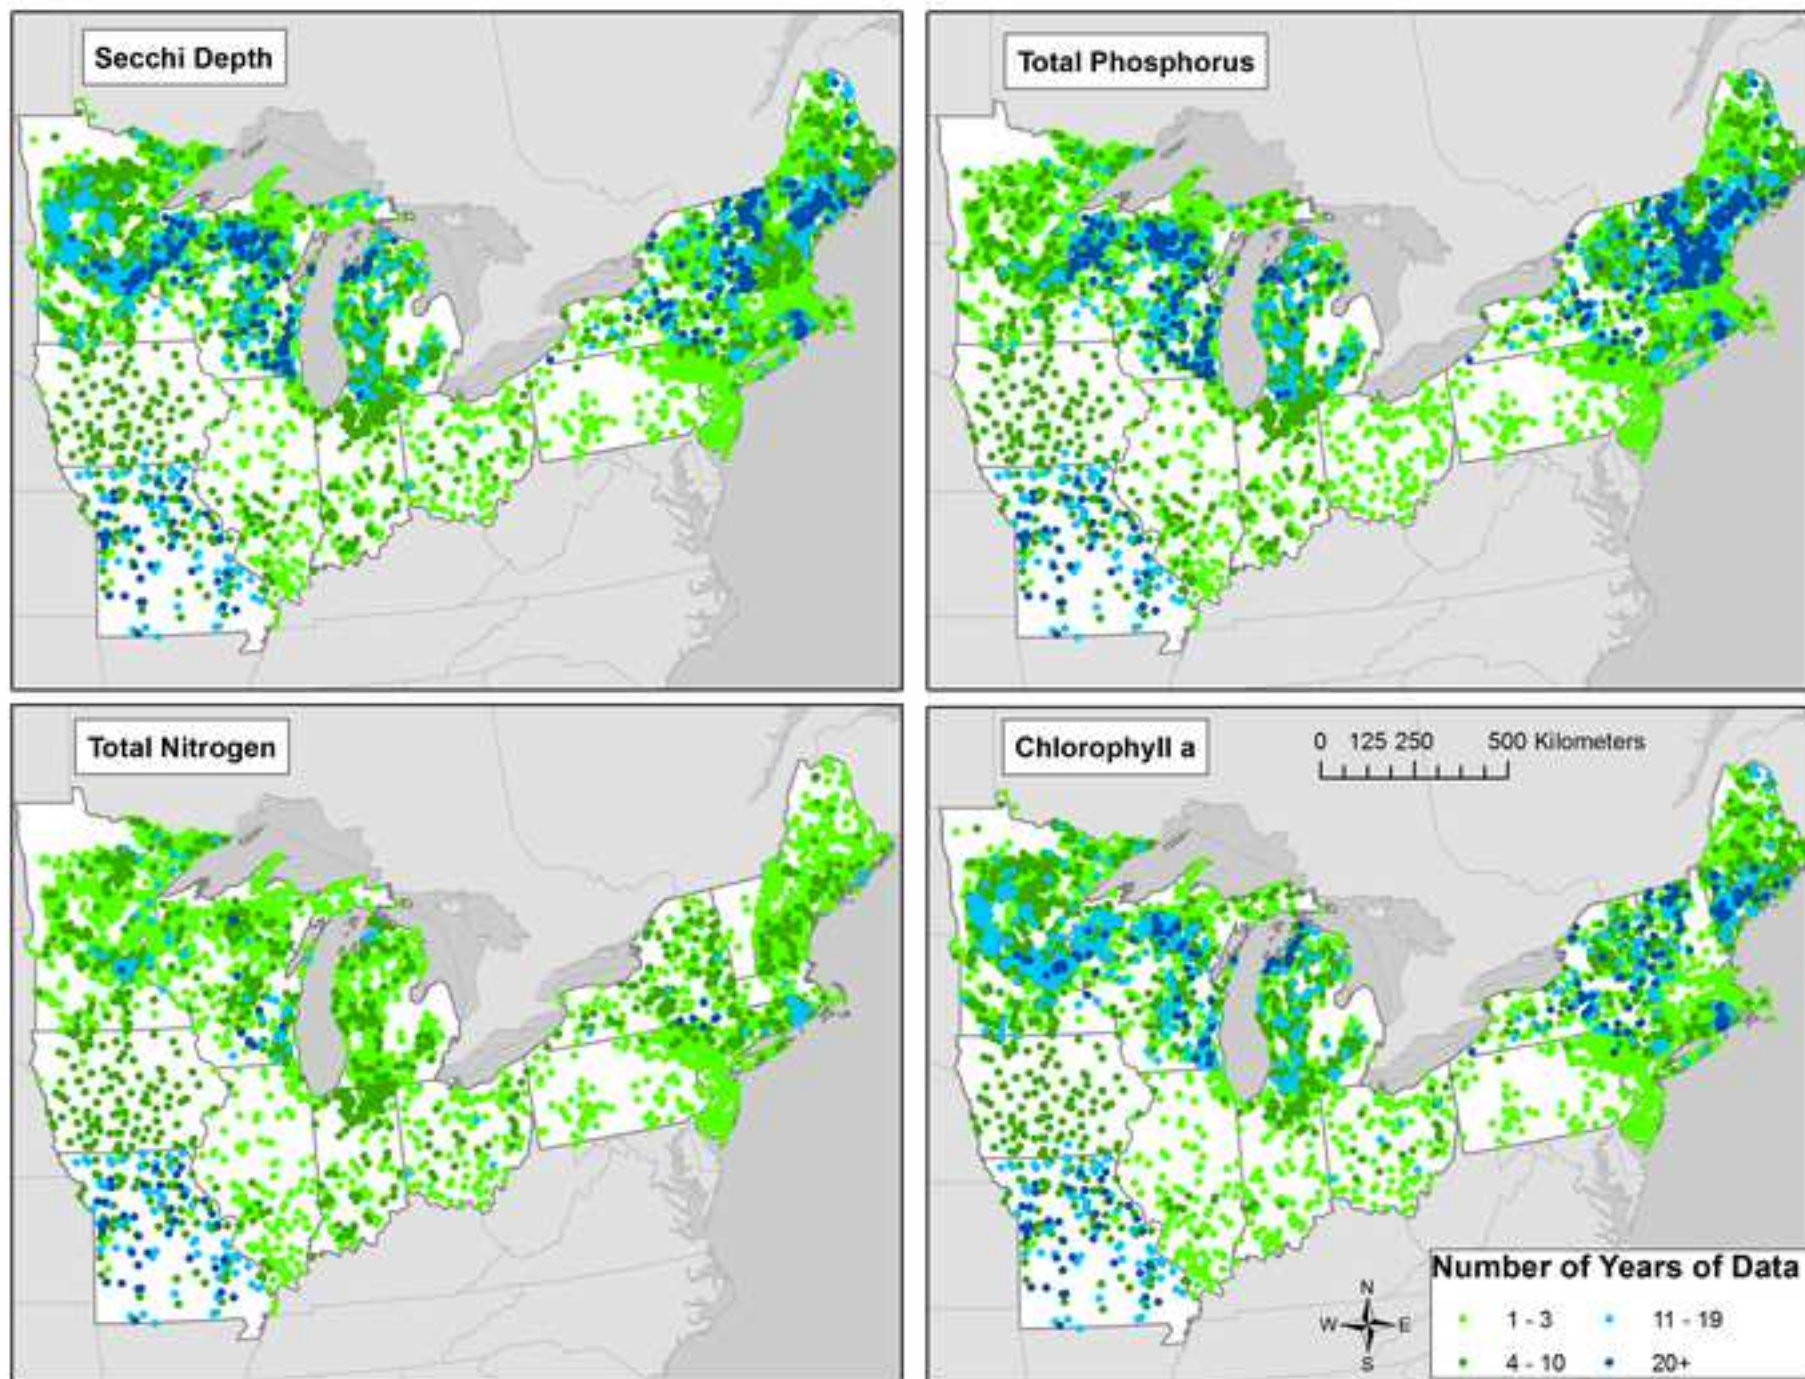

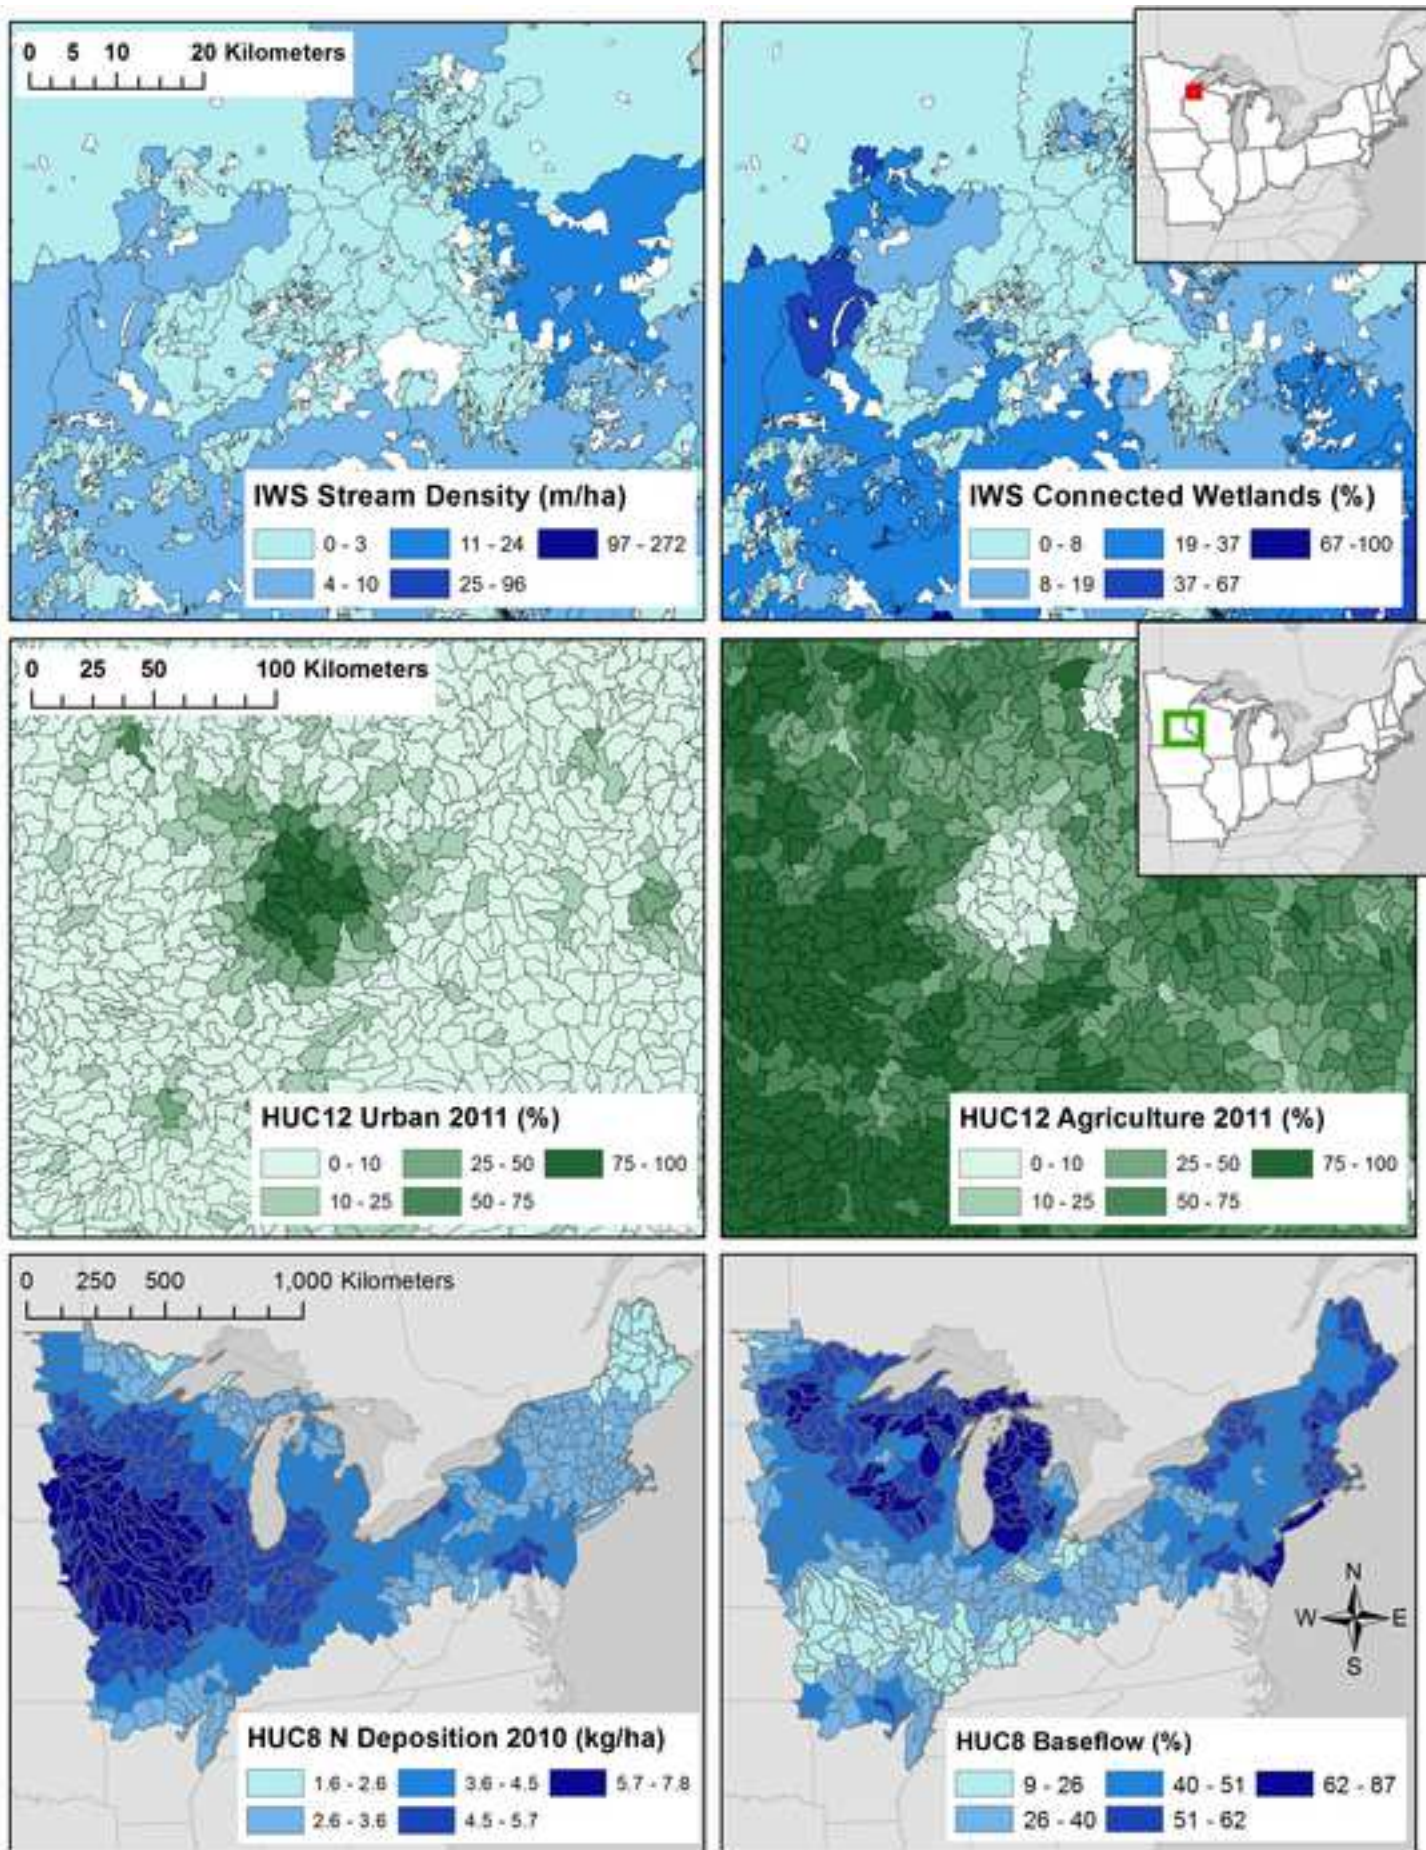

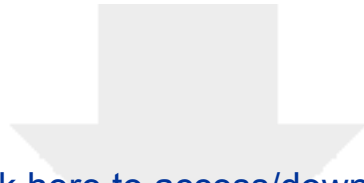

[Click here to access/download](#)

**Supplementary Material**

[Soranno\\_etal\\_2017\\_Additional file 1\\_8SEP17\\_v2.docx](#)

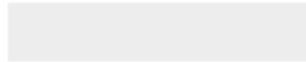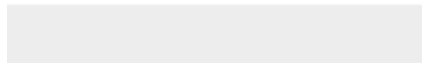





Click here to access/download

**Supplementary Material**

Soranno\_etal\_2017\_Additional file 2\_qaqc-  
limno\_v2.docx



Dr. Goodman, Editor-in-chief  
GigaScience

May 16, 2017

Dear Dr. Goodman,

Please find enclosed our manuscript, *LAGOS-NE: A multi-scaled geospatial temporal database of lake ecological context and water quality for thousands of U.S. lakes* by Soranno et al., which we would like to submit for publication as a *Data Note* in GigaScience. We describe and make available a very large integrated, geospatial database for water quality. Given the size and scope of the database, the Data Note is likely longer than many such articles published in this journal. However, we wanted to include sufficient detail to correctly describe the database for future use of scientists. This is the database for which we described previously in a Review article published in GigaScience in 2015 (<https://gigascience.biomedcentral.com/articles/10.1186/s13742-015-0067-4>). For this Data Note, we are making the data available, and describing the data itself. Given the reception that the previous article received, we think the research community will find our database useful. Also, we appreciated the flexibility that GigaScience provided us in drafting our previous paper that describe the methods in detail, and having the data paper published in the same journal seems to make sense so that future data users can find both papers easily. We have decided to place the data in the Environmental Data Initiative data repository as described in our paper.

We confirm that this manuscript has not been published elsewhere and is not under consideration by another journal. All authors have approved the manuscript, agree with its submission to GigaScience, and have no competing interests.

Michigan State  
University

College of  
Agriculture and  
Natural Resources

DEPARTMENT OF  
FISHERIES AND  
WILDLIFE

480 Wilson Road, Room 13  
Natural Resources Bldg.  
East Lansing, MI 48824

517/355-4478  
FAX: 517/432-1699

We recommend the following reviewers:

Dr. Carly Strasser, DataCite Organization, Oakland, CA [carlystrasser@gmail.com](mailto:carlystrasser@gmail.com)

Dr. Simon Goring, University of Wisconsin, Madison, [goring@wisc.edu](mailto:goring@wisc.edu)

Dr. Matthew Jones, University of California, Santa Barbara, [jones@nceas.ucsb.edu](mailto:jones@nceas.ucsb.edu)

We look forward to hearing from you.

Sincerely,



Dr. Patricia A. Soranno, corresponding author  
Professor  
Michigan State University
