# Supplementary material for: LAGOS-NE: a multi-scaled geospatial and temporal database of lake ecological context and water quality for thousands of US lakes
Source: Oxford University Press journal article supplement (doi:10.1093/gigascience/gix101), 2017-10-19
Supplement: gigascience_6_12_gix101_s3.pdf [file gigascience_6_12_gix101_s3.pdf]

# GigaScience

## LAGOS-NE: A multi-scaled geospatial and temporal database of lake ecological context and water quality for thousands of U.S. lakes

--Manuscript Draft--

|                             |                                                                                                                                    |                                                            |
|-----------------------------|------------------------------------------------------------------------------------------------------------------------------------|------------------------------------------------------------|
| <b>Manuscript Number:</b>   | GIGA-D-17-00112R2                                                                                                                  |                                                            |
| <b>Full Title:</b>          | LAGOS-NE: A multi-scaled geospatial and temporal database of lake ecological context and water quality for thousands of U.S. lakes |                                                            |
| <b>Article Type:</b>        | Data Note                                                                                                                          |                                                            |
| <b>Funding Information:</b> | State of Maine                                                                                                                     | Lake Ecologist Linda C Bacon                               |
|                             | U.S. Environmental Protection Agency (106/319)                                                                                     | Not applicable                                             |
|                             | U.S. Army Corps of Engineers (US)                                                                                                  | Limnologist Marvin G Boyer                                 |
|                             | Michigan Agricultural Experiment Station<br>Disciplinary Research Grant Program                                                    | Associate Professor Mary T Bremigan                        |
|                             | Michigan Department of Natural Resources                                                                                           | Professor Kendra S Cheruvellil                             |
|                             | National Science Foundation (1027253)                                                                                              | Professor Stephen K Hamilton                               |
|                             | New York State Division of Water Quality                                                                                           | Chief Scott A Kishbaugh                                    |
|                             | Wisconsin Department of Natural Resources                                                                                          | Professor Stephen R Carpenter                              |
|                             | University of Wisconsin-Madison                                                                                                    | Professor Stephen R Carpenter                              |
|                             | National Science Foundation (1455461)                                                                                              | Professor Stephen R Carpenter                              |
|                             | Tribal General Fund                                                                                                                | Water Regulatory and Restoration Specialist Karen E Bednar |
|                             | Aquatic Plant Management Society                                                                                                   | Associate Professor Mary T Bremigan                        |
|                             | Aquatic Ecosystem Restoration Foundation                                                                                           | Associate Professor Mary T Bremigan                        |
|                             | Michigan State University                                                                                                          | Associate Professor Mary T Bremigan                        |
|                             | U.S. Environmental Protection Agency (U-915958801-2)                                                                               | Professor Kendra S Cheruvellil                             |
|                             | Andrew W. Mellon Foundation                                                                                                        | Professor Stephen R Carpenter                              |
|                             | U.S. Fish and Wildlife Service (F-69-R)                                                                                            | Dr. Joseph D Conroy                                        |
|                             | Iowa Department of Natural Resources (ESD04HALFasch110155)                                                                         | Research Associate Christopher T Filstrup                  |
|                             | Minnesota Pollution Control Agency                                                                                                 | Professor John A Downing                                   |
|                             | National Science Foundation<br>Macrosystems Biology Program (EF-1065786, EF-1638679)                                               | Professor Patricia Ann Soranno                             |
|                             | Ohio Department of Natural Resources<br>Division of Wildlife                                                                       | Professor Maria J Gonzalez                                 |
|                             | University of Rhode Island Watershed Watch                                                                                         | Program Director Linda T Green                             |
|                             | National Science Foundation North Temperate Lakes LTER Program (1440297)                                                           | Research Professor Paul C Hanson                           |
|                             | Lac du Flambeau Band and Bureau of Indian Affairs                                                                                  | Ecologist Celeste Hockings                                 |
|                             | Indiana Department of Environmental Management                                                                                     | Professor Emeritus William W Jones                         |
|                             | Missouri Department of Natural Resources                                                                                           | Curators' Professor Emeritus John R Jones                  |

|                                                                                    |                                                           |
|------------------------------------------------------------------------------------|-----------------------------------------------------------|
| U.S. Environmental Protection Agency (US) Clean Water Act Section 16               | Water Quality Specialist Caroline M Keson                 |
| Michigan Department of Environmental Quality                                       | Academic Specialist Jo A Latimore                         |
| Massachusetts Water Supply Protection Trust                                        | Environmental Analyst Yuehlin Lee                         |
| U.S. Environmental Protection Agency (US) Clean Air Markets Division (LTM Network) | Biologist Clara S Funk                                    |
| New York City Department of Environmental Protection                               | Research Scientist Karen E.B Moore                        |
| U.S. Geological Survey (US) Water Availability and Use Science Program (WAUSP)     | Research Hydrologist Brian P Neff                         |
| U.S. Geological Survey                                                             | Research Hydrologist Donald O Rosenberry                  |
| New York State Energy Research and Development Authority                           | MS Karen M Roy                                            |
| National Institute of Food and Agriculture (1003732)                               | Professor Lars G Rudstam                                  |
| New York State Department of Environmental Conservation                            | Senior Research Associate James R Jackson                 |
| Lake Sunapee Protective Association                                                | G. Evelyn Hutchinson Chair of Ecology Kathleen C Weathers |
| National Oceanic and Atmospheric Administration                                    | Senior Scientist Craig A Stow                             |
| Gull Lake Quality Organization                                                     | Senior Scientist Craig A Stow                             |
| Clean Michigan Initiative                                                          | Aquatic Biologist Marcy K Wilmes                          |
| City of New York                                                                   | Chief Lorraine L Janus                                    |
| National Science Foundation (US) DBI (1401954)                                     | Postdoctoral Fellow Sarah M Collins                       |
| National Institute of Food and Agriculture (176820)                                | Professor Patricia Ann Soranno                            |
| U.S. Environmental Protection Agency (US) Office of Research and Development       | Not applicable                                            |

**Abstract:**

**Background**

Understanding the factors that affect water quality and the ecological services provided by freshwater ecosystems is an urgent global environmental issue. Predicting how water quality will respond to global changes not only requires water quality data, but also information about the ecological context of individual water bodies across broad spatial extents. Because lake water quality is usually sampled in limited geographic regions, often for limited time periods, assessing the environmental controls of water quality requires compilation of many datasets across broad regions and across time into an integrated database. LAGOS-NE accomplishes this goal for lakes in the northeastern-most 17 U.S. states.

**Findings**

LAGOS-NE contains data for 51,101 lakes and reservoirs larger than 4 ha in 17 lake-rich U.S. states. The database includes three data modules for: lake location and physical characteristics for all lakes; ecological context (i.e., the land use, geologic, climatic, and hydrologic setting of lakes) for all lakes; and in situ measurements of lake water quality for a subset of the lakes from the past three decades for approximately 2,600-12,000 lakes depending on the variable. The database contains approximately 150,000 measures of total phosphorus, 200,000 measures of chlorophyll, and 900,000 measures of Secchi depth. The water quality data were compiled from 87 lake water quality datasets from federal, state, tribal, and non-profit agencies, university researchers, and citizen scientists.

**Conclusions**

This database is one of the largest and most comprehensive databases of its type

|                                                      |                                                                                                                                                                                                                                                                                                                       |
|------------------------------------------------------|-----------------------------------------------------------------------------------------------------------------------------------------------------------------------------------------------------------------------------------------------------------------------------------------------------------------------|
|                                                      | because it includes both in situ measurements and ecological context data. Because ecological context can be used to study a variety of other questions about lakes, streams, and wetlands, this database can also be used as the foundation for other studies of freshwaters at broad spatial and ecological scales. |
| <b>Corresponding Author:</b>                         | Patricia Ann Soranno, Ph.D<br>Michigan State University<br>East Lansing, Michigan UNITED STATES                                                                                                                                                                                                                       |
| <b>Corresponding Author Secondary Information:</b>   |                                                                                                                                                                                                                                                                                                                       |
| <b>Corresponding Author's Institution:</b>           | Michigan State University                                                                                                                                                                                                                                                                                             |
| <b>Corresponding Author's Secondary Institution:</b> |                                                                                                                                                                                                                                                                                                                       |
| <b>First Author:</b>                                 | Patricia Ann Soranno, Ph.D                                                                                                                                                                                                                                                                                            |
| <b>First Author Secondary Information:</b>           |                                                                                                                                                                                                                                                                                                                       |
| <b>Order of Authors:</b>                             | Patricia Ann Soranno, Ph.D                                                                                                                                                                                                                                                                                            |
|                                                      | Linda C Bacon                                                                                                                                                                                                                                                                                                         |
|                                                      | Michael Beauchene                                                                                                                                                                                                                                                                                                     |
|                                                      | Karen E Bednar                                                                                                                                                                                                                                                                                                        |
|                                                      | Edward G Bissell                                                                                                                                                                                                                                                                                                      |
|                                                      | Claire K Boudreau                                                                                                                                                                                                                                                                                                     |
|                                                      | Marvin G Boyer                                                                                                                                                                                                                                                                                                        |
|                                                      | Mary T Bremigan                                                                                                                                                                                                                                                                                                       |
|                                                      | Stephen R Carpenter                                                                                                                                                                                                                                                                                                   |
|                                                      | Jamie W Carr                                                                                                                                                                                                                                                                                                          |
|                                                      | Kendra S Cheruvellil                                                                                                                                                                                                                                                                                                  |
|                                                      | Samuel T Christel                                                                                                                                                                                                                                                                                                     |
|                                                      | Matt Claucherty                                                                                                                                                                                                                                                                                                       |
|                                                      | Sarah M Collins                                                                                                                                                                                                                                                                                                       |
|                                                      | Joseph D Conroy                                                                                                                                                                                                                                                                                                       |
|                                                      | Jed Dukett                                                                                                                                                                                                                                                                                                            |
|                                                      | John A Downing                                                                                                                                                                                                                                                                                                        |
|                                                      | C. Emi Fergus                                                                                                                                                                                                                                                                                                         |
|                                                      | Christopher T Filstrup                                                                                                                                                                                                                                                                                                |
|                                                      | Clara S Funk                                                                                                                                                                                                                                                                                                          |
|                                                      | Maria J Gonzalez                                                                                                                                                                                                                                                                                                      |
|                                                      | Linda T Green                                                                                                                                                                                                                                                                                                         |
|                                                      | Corinna Gries                                                                                                                                                                                                                                                                                                         |
|                                                      | John D Halfman                                                                                                                                                                                                                                                                                                        |
|                                                      | Stephen K Hamilton                                                                                                                                                                                                                                                                                                    |
|                                                      | Paul C Hanson                                                                                                                                                                                                                                                                                                         |
|                                                      | Emily N Henry                                                                                                                                                                                                                                                                                                         |
|                                                      | Elizabeth M Herron                                                                                                                                                                                                                                                                                                    |

|                        |
|------------------------|
| Celeste Hockings       |
| James R Jackson        |
| Kari Jacobson-Hedin    |
| Lorraine L Janus       |
| William W Jones        |
| John R Jones           |
| Caroline M Keson       |
| Katelyn B.S King       |
| Scott A Kishbaugh      |
| Jean-Francois Lapierre |
| Barbara F Lathrop      |
| Jo A Latimore          |
| Yuehlin Lee            |
| Noah R Lottig          |
| Jason A Lynch          |
| Leslie J Matthews      |
| Bill H McDowell        |
| Karen E.B Moore        |
| Brian P Neff           |
| Sarah J Nelson         |
| Samantha K Oliver      |
| Michael L Pace         |
| Don C Pierson          |
| Autumn C Poisson       |
| Amina I Pollard        |
| David M Post           |
| Paul O Reyes           |
| Donald O Rosenberry    |
| Karen M Roy            |
| Lars G Rudstam         |
| Orlando Sarnelle       |
| Nancy J Schuldt        |
| Caren E Scott          |
| Nicholas K Skaff       |
| Nicole J Smith         |
| Nick R Spinelli        |
| Joseph J Stachelek     |
| Emily H Stanley        |
| John L Stoddard        |
| Scott B Stopyak        |
| Craig A Stow           |

|                                                                                                                                                                                                                                                                                                                                                                                   |                                                                                                                                                                                                                                                                                                                                                                                                                                                                                                                                                                                                            |
|-----------------------------------------------------------------------------------------------------------------------------------------------------------------------------------------------------------------------------------------------------------------------------------------------------------------------------------------------------------------------------------|------------------------------------------------------------------------------------------------------------------------------------------------------------------------------------------------------------------------------------------------------------------------------------------------------------------------------------------------------------------------------------------------------------------------------------------------------------------------------------------------------------------------------------------------------------------------------------------------------------|
|                                                                                                                                                                                                                                                                                                                                                                                   | Jason M Tallant                                                                                                                                                                                                                                                                                                                                                                                                                                                                                                                                                                                            |
|                                                                                                                                                                                                                                                                                                                                                                                   | Pang-Ning Tan                                                                                                                                                                                                                                                                                                                                                                                                                                                                                                                                                                                              |
|                                                                                                                                                                                                                                                                                                                                                                                   | Anthony P Thorpe                                                                                                                                                                                                                                                                                                                                                                                                                                                                                                                                                                                           |
|                                                                                                                                                                                                                                                                                                                                                                                   | Ty Wagner                                                                                                                                                                                                                                                                                                                                                                                                                                                                                                                                                                                                  |
|                                                                                                                                                                                                                                                                                                                                                                                   | Michael J Vanni                                                                                                                                                                                                                                                                                                                                                                                                                                                                                                                                                                                            |
|                                                                                                                                                                                                                                                                                                                                                                                   | Gretchen Watkins                                                                                                                                                                                                                                                                                                                                                                                                                                                                                                                                                                                           |
|                                                                                                                                                                                                                                                                                                                                                                                   | Kathleen C Weathers                                                                                                                                                                                                                                                                                                                                                                                                                                                                                                                                                                                        |
|                                                                                                                                                                                                                                                                                                                                                                                   | Katherine E Webster                                                                                                                                                                                                                                                                                                                                                                                                                                                                                                                                                                                        |
|                                                                                                                                                                                                                                                                                                                                                                                   | Jeffrey D White                                                                                                                                                                                                                                                                                                                                                                                                                                                                                                                                                                                            |
|                                                                                                                                                                                                                                                                                                                                                                                   | Marcy K Wilmes                                                                                                                                                                                                                                                                                                                                                                                                                                                                                                                                                                                             |
|                                                                                                                                                                                                                                                                                                                                                                                   | Shuai Yuan                                                                                                                                                                                                                                                                                                                                                                                                                                                                                                                                                                                                 |
| <b>Order of Authors Secondary Information:</b>                                                                                                                                                                                                                                                                                                                                    |                                                                                                                                                                                                                                                                                                                                                                                                                                                                                                                                                                                                            |
| <b>Response to Reviewers:</b>                                                                                                                                                                                                                                                                                                                                                     | <p>All suggested changes have been made. Please note that some author affiliations have changed, which I updated in the word file, however, i did not see where to change/add author affiliations to the author-boxes in the online form.</p> <p>I have also made some minor changes to text and figure/table legends based on an internal USGS review that i was required to do because I have numerous USGS-affiliated co-authors. If you would like to see a track-changes version of the word doc that shows those changes, I can provide that. However, they were mostly minor editorial changes.</p> |
| <b>Additional Information:</b>                                                                                                                                                                                                                                                                                                                                                    |                                                                                                                                                                                                                                                                                                                                                                                                                                                                                                                                                                                                            |
| <b>Question</b>                                                                                                                                                                                                                                                                                                                                                                   | <b>Response</b>                                                                                                                                                                                                                                                                                                                                                                                                                                                                                                                                                                                            |
| Are you submitting this manuscript to a special series or article collection?                                                                                                                                                                                                                                                                                                     | No                                                                                                                                                                                                                                                                                                                                                                                                                                                                                                                                                                                                         |
| <b>Experimental design and statistics</b>                                                                                                                                                                                                                                                                                                                                         | Yes                                                                                                                                                                                                                                                                                                                                                                                                                                                                                                                                                                                                        |
| <p>Full details of the experimental design and statistical methods used should be given in the Methods section, as detailed in our <a href="#">Minimum Standards Reporting Checklist</a>. Information essential to interpreting the data presented should be made available in the figure legends.</p> <p>Have you included all the information requested in your manuscript?</p> |                                                                                                                                                                                                                                                                                                                                                                                                                                                                                                                                                                                                            |
| <b>Resources</b>                                                                                                                                                                                                                                                                                                                                                                  | Yes                                                                                                                                                                                                                                                                                                                                                                                                                                                                                                                                                                                                        |
| <p>A description of all resources used, including antibodies, cell lines, animals and software tools, with enough information to allow them to be uniquely identified, should be included in the Methods section. Authors are strongly encouraged to cite <a href="#">Research Resource Identifiers</a> (RRIDs) for antibodies, model organisms and tools, where possible.</p>    |                                                                                                                                                                                                                                                                                                                                                                                                                                                                                                                                                                                                            |

|                                                                                                                                                                                                                                                                                                                                                                                                                                                                                                                                                         |            |
|---------------------------------------------------------------------------------------------------------------------------------------------------------------------------------------------------------------------------------------------------------------------------------------------------------------------------------------------------------------------------------------------------------------------------------------------------------------------------------------------------------------------------------------------------------|------------|
| <p>Have you included the information requested as detailed in our <a href="#">Minimum Standards Reporting Checklist</a>?</p>                                                                                                                                                                                                                                                                                                                                                                                                                            |            |
| <p><b>Availability of data and materials</b></p> <p>All datasets and code on which the conclusions of the paper rely must be either included in your submission or deposited in <a href="#">publicly available repositories</a> (where available and ethically appropriate), referencing such data using a unique identifier in the references and in the “Availability of Data and Materials” section of your manuscript.</p> <p>Have you have met the above requirement as detailed in our <a href="#">Minimum Standards Reporting Checklist</a>?</p> | <p>Yes</p> |

1  
2  
3  
4 1 *For submission as a Data Note to GigaScience*

5 2  
6 3  
7 4  
8 5  
9 6  
10 7  
11 7 **LAGOS-NE: A multi-scaled geospatial and temporal database of lake ecological**  
12 8 **context and water quality for thousands of U.S. lakes**  
13 9  
14 9

15 10  
16 11  
17 12 **Authors:**

18 13 Patricia A. Soranno<sup>1</sup>, Linda C. Bacon<sup>2</sup>, Michael Beauchene<sup>3</sup>, Karen E. Bednar<sup>4</sup>, Edward G. Bissell<sup>1</sup>, Claire K.  
19 14 Boudreau<sup>1</sup>, Marvin G. Boyer<sup>5</sup>, Mary T. Bremigan<sup>1</sup>, Stephen R. Carpenter<sup>6</sup>, Jamie W. Carr<sup>7</sup>, Kendra S.  
20 15 Cheruvelil<sup>1</sup>, Samuel T. Christel<sup>6</sup>, Matt Claucherty<sup>8</sup>, Sarah M. Collins<sup>6</sup>, Joseph D. Conroy<sup>9</sup>, John A. Downing<sup>10</sup>,  
21 16 Jed Dukett<sup>11</sup>, C. Emi Fergus<sup>12</sup>, Christopher T. Filstrup<sup>10</sup>, Clara Funk<sup>13</sup>, Maria J. Gonzalez<sup>14</sup>, Linda T. Green<sup>15</sup>,  
22 17 Corinna Gries<sup>6</sup>, John D. Halfman<sup>16</sup>, Stephen K. Hamilton<sup>17</sup>, Paul C. Hanson<sup>6</sup>, Emily N. Henry<sup>18</sup>, Elizabeth M.  
23 18 Herron<sup>19</sup>, Celeste Hockings<sup>20</sup>, James R. Jackson<sup>21</sup>, Kari Jacobson-Hedin<sup>22</sup>, Lorraine L. Janus<sup>23</sup>, William W.  
24 19 Jones<sup>24</sup>, John R. Jones<sup>25</sup>, Caroline M. Keson<sup>26</sup>, Katelyn B.S. King<sup>1</sup>, Scott A. Kishbaugh<sup>27</sup>, Jean-Francois  
25 20 Lapierre<sup>28</sup>, Barbara Lathrop<sup>29</sup>, Jo A. Latimore<sup>1</sup>, Yuehlin Lee<sup>30</sup>, Noah R. Lottig<sup>31</sup>, Jason A. Lynch<sup>13</sup>, Leslie J.  
26 21 Matthews<sup>33</sup>, William H. McDowell<sup>34</sup>, Karen E.B. Moore<sup>35</sup>, Brian P. Neff<sup>36</sup>, Sarah J. Nelson<sup>37</sup>, Samantha K.  
27 22 Oliver<sup>6</sup>, Michael L. Pace<sup>38</sup>, Donald C. Pierson<sup>39</sup>, Autumn C. Poisson<sup>1</sup>, Amina I. Pollard<sup>40</sup>, David M. Post<sup>41</sup>, Paul  
28 23 O. Reyes<sup>30</sup>, Donald O. Rosenberry<sup>42</sup>, Karen M. Roy<sup>43</sup>, Lars G. Rudstam<sup>44</sup>, Orlando Sarnelle<sup>1</sup>, Nancy J.  
29 24 Schuldt<sup>45</sup>, Caren E. Scott<sup>46</sup>, Nicholas K. Skaff<sup>1</sup>, Nicole J. Smith<sup>1</sup>, Nick R. Spinelli<sup>47</sup>, Joseph J. Stachelek<sup>1</sup>, Emily  
30 25 H. Stanley<sup>6</sup>, John L. Stoddard<sup>48</sup>, Scott B. Stopyak<sup>49</sup>, Craig A. Stow<sup>50</sup>, Jason M. Tallant<sup>51</sup>, Pang-Ning Tan<sup>52</sup>,  
31 26 Anthony P. Thorpe<sup>25</sup>, Michael J. Vanni<sup>53</sup>, Tyler Wagner<sup>54</sup>, Gretchen Watkins<sup>4</sup>, Kathleen C. Weathers<sup>56</sup>,  
32 27 Katherine E. Webster<sup>57</sup>, Jeffrey D. White<sup>58</sup>, Marcy K. Wilmes<sup>59</sup>, Shuai Yuan<sup>52</sup>  
33 28  
34 29

35 26  
36 27  
37 28  
38 29 **ORCID:**

39 30 Patricia Soranno, 0000-0003-1668-9271  
40 31 Kendra Cheruvelil, 0000-0003-1880-2880  
41 32 Sarah Collins, 0000-0001-5503-7386  
42 33 C.Emi Fergus, 0000-0001-8722-9788  
43 34 Jean Francois Lapierre, 0000-0001-5862-7955  
44 35 Nicholas Skaff, 000-0002-5929-3966  
45 36 Pang-Ning Tan, 0000-0003-3205-0339  
46 37  
47 38  
48 39

49 38  
50 39 <sup>1</sup>Department of Fisheries and Wildlife, Michigan State University, East Lansing, MI 48824, USA

51 40 <sup>2</sup>Department of Environmental Protection, State of Maine, Augusta, ME 04330, USA

52 41 <sup>3</sup>Department of Energy and Environmental Protection, State of Connecticut, Hartford, CT 06106, USA

53 42 <sup>4</sup>Water Resources Program, Lac du Flambeau Tribal Natural Resources, Lac du Flambeau, WI, USA

54 43 <sup>5</sup>Environmental Planning, US Army Corps of Engineers, Kansas City, MO 64106, USA

55 44 <sup>6</sup>Center for Limnology, University of Wisconsin Madison, Madison, WI 53706 USA

56 45 <sup>7</sup>Office of Watershed Management, Massachusetts Department of Conservation and Recreation, West Boylston, MA 10583, USA

57 46 <sup>8</sup>Watershed Protection, Tipp of the Mitt Watershed Council, Petoskey, MI 49770, USA

58 47 <sup>9</sup>Division of Wildlife, Inland Fisheries Research Unit, Ohio Department of Natural Resources, Hebron, OH 43025, USA

59 48 <sup>10</sup>Large Lakes Observatory, University of Minnesota, Duluth, MN 55812 USA  
60  
61  
62  
63  
64  
65

1  
2  
3  
4 49 <sup>11</sup>Adirondack Lake Survey Corporation, Ray Brook, NY 12977 USA  
5 50 <sup>12</sup>National Research Council, US Environmental Protection Agency, Corvallis, OR 97333, USA  
6 51 <sup>13</sup>Office of Air and Radiation, US Environmental Protection Agency, Washington, DC 20460, USA  
7 52 <sup>14</sup>Department of Biology, Miami University, Oxford, OH 45056, USA  
8 53 <sup>15</sup>Natural Resource Science, University of Rhode Island, Kingston, RI 02892 USA  
9 54 <sup>16</sup>Geoscience, Hobart & William Smith Colleges, Geneva, NY 14456 USA  
10 55 <sup>17</sup>Kellogg Biological Station, Michigan State University, Hickory Corners, MI 49060, USA  
11 56 <sup>18</sup>Outreach and Engagement, Oregon State University, Corvallis, OR 97331, USA  
12 57 <sup>19</sup>Watershed Watch, University of Rhode Island, Kingston, RI 02881, USA  
13 58 <sup>20</sup>Natural Resource Department, Lac du Flambeau Band of Lake Superior Chippewa Indians, Lac du Flambeau, WI 54538, USA  
14 59 <sup>21</sup>Department of Natural Resources, Cornell University, Bridgeport, NY, USA  
15 60 <sup>22</sup>Office of Water Protection, Fond du Lac Reservation, Cloquet, MN 55720 USA  
16 61 <sup>23</sup>Bureau of Water Supply, New York City Department of Environmental Protection, Valhalla, NY 10560, USA  
17 62 <sup>24</sup>School of Public and Environmental Affairs, Indiana University, Bloomington, IN 47408, USA  
18 63 <sup>25</sup>School of Natural Resources, University of Missouri, Columbia, MO, USA  
19 64 <sup>26</sup>Natural Resource Department, Little Traverse Bay Bands of Odawa Indians, Harbor Springs, MI 49740, USA  
20 65 <sup>27</sup>Division of Water, New York State Department of Environmental Conservation, Albany, NY 12233, USA  
21 66 <sup>28</sup>Department of Biological Science, University of Montreal, Montreal Quebec, Canada, H3C 3J7  
22 67 <sup>29</sup>Pennsylvania Department of Environmental Protection, State of Pennsylvania, Harrisburg, PA 17101 USA  
23 68 <sup>30</sup>Office of Watershed Management, Massachusetts Department of Conservation and Recreation, Belchertown, MA 01007, USA  
24 69 <sup>31</sup>Trout Lake Research Station, University of Wisconsin, Boulder Junction, WI 54512, USA  
25 70 <sup>33</sup>Lakes and Ponds Program, Vermont Department of Environmental Conservation, Montpelier, VT 05620, USA  
26 71 <sup>34</sup>Natural Resources and the Environment, University of New Hampshire, Durham, NH 03824, USA  
27 72 <sup>35</sup>Water Quality Science and Research, New York City Department of Environmental Protection, Kingston, NY 12401, USA  
28 73 <sup>36</sup>National Research Program, USGS, Denver CO 80225, USA  
29 74 <sup>37</sup>School of Forest Resources, University of Maine, Orono, ME, USA  
30 75 <sup>38</sup>Department of Environmental Science, University of Virginia, Charlottesville, VA 22904, USA  
31 76 <sup>39</sup>Department of Ecology and Genetics, Uppsala University, Uppsala, Sweden  
32 77 <sup>40</sup>Office of Water, US EPA, Washington, DC 20460, USA  
33 78 <sup>41</sup>Ecology and Evolutionary Biology, Yale University, Connecticut 06511, USA  
34 79 <sup>42</sup>National Research Program, USGS, Denver, CO 80225, USA  
35 80 <sup>43</sup>Division of Air Resources, New York State Department of Environmental Conservation, Ray Brook, NY 12977, USA  
36 81 <sup>44</sup>Department of Natural Resources, Cornell University, Ithaca, NY 14850, USA  
37 82 <sup>45</sup>Environmental Program, Fond du Lac Band of Lake Superior Chippewa Indians, Cloquet, MN 55720, USA  
38 83 <sup>46</sup>Aquatic Science, NEON, Boulder, CO 80301, USA  
39 84 <sup>47</sup>Watershed Management, Lake Wallenpaupack Watershed Management District, Hawley, PA, USA  
40 85 <sup>48</sup>Western Ecology Division, Office of Research and Development, US EPA, Corvallis, OR 97333, USA  
41 86 <sup>49</sup>Technology Services, Eaton County, Charlotte, MI, USA  
42 87 <sup>50</sup>Great Lakes Environmental Research Lab, NOAA, Ann Arbor, MI 47176, USA  
43 88 <sup>51</sup>Biological Station, University of Michigan, Pellston, MI 49769, USA  
44 89 <sup>52</sup>Computer Science and Engineering, Michigan State University, East Lansing, MI 48824, USA  
45 90 <sup>53</sup>Department of Zoology, Miami University, Oxford, OH 45056 USA  
46 91 <sup>54</sup> Pennsylvania Cooperative Fish and Wildlife Research Unit, USGS, 402 Forest Resources Building, University Park, PA 16802,  
47 92 USA.  
48 93 <sup>56</sup> Cary Institute of Ecosystem Studies, Millbrook, NY, USA  
49 94 <sup>57</sup>School of Natural Sciences, Trinity College, Dublin, Ireland  
50 95 <sup>58</sup>Biology Department, Framingham State University, Framingham, MA 01702, USA  
51 96 <sup>59</sup>Department of Environmental Quality, State of Michigan, Lansing, MI 48909, USA  
52 97  
53 98  
54  
55  
56  
57  
58  
59  
60  
61  
62  
63  
64  
65



1  
2  
3  
4  
5  
6  
7  
8  
9  
10  
11  
12  
13  
14  
15  
16  
17  
18  
19  
20  
21  
22  
23  
24  
25  
26  
27  
28  
29  
30  
31  
32  
33  
34  
35  
36  
37  
38  
39  
40  
41  
42  
43  
44  
45  
46  
47  
48  
49  
50  
51  
52  
53  
54  
55  
56  
57  
58  
59  
60  
61  
62  
63  
64  
65

**ABSTRACT**

**Background**

Understanding the factors that affect water quality and the ecological services provided by freshwater ecosystems is an urgent global environmental issue. Predicting how water quality will respond to global changes not only requires water quality data, but also information about the ecological context of individual water bodies across broad spatial extents. Because lake water quality is usually sampled in limited geographic regions, often for limited time periods, assessing the environmental controls of water quality requires compilation of many datasets across broad regions and across time into an integrated database. LAGOS-NE accomplishes this goal for lakes in the northeastern-most 17 U.S. states.

**Findings**

LAGOS-NE contains data for 51,101 lakes and reservoirs larger than 4 ha in 17 lake-rich U.S. states. The database includes three data modules for: lake location and physical characteristics for all lakes; ecological context (i.e., the land use, geologic, climatic, and hydrologic setting of lakes) for all lakes; and in situ measurements of lake water quality for a subset of the lakes from the past three decades for approximately 2,600-12,000 lakes depending on the variable. The database contains approximately 150,000 measures of total phosphorus, 200,000 measures of chlorophyll, and 900,000 measures of Secchi depth. The water quality data were compiled from 87 lake water quality datasets from federal, state, tribal, and non-profit agencies, university researchers, and citizen scientists.

**Conclusions**

This database is one of the largest and most comprehensive databases of its type because it includes both in situ measurements and ecological context data. Because ecological context can be used to study a variety of other questions about lakes, streams, and wetlands, this database can also be used as the foundation for other studies of freshwaters at broad spatial and ecological scales.

**KEYWORDS**

Lake eutrophication, Nutrients, Water quality, Lake trophic state, Ecological context, LAGOS-NE, Open science, Lake database

# 1. Data Description

A major concern for water quality in freshwaters globally is cultural eutrophication, or excess nutrient inputs from human activities that lead to increased plant and algal growth. In many parts of the world, runoff from land, or nonpoint-source pollution, has replaced discharges of sewage, or point-source pollution, as the primary driver of lake and reservoir eutrophication [1]. In lakes and reservoirs, eutrophication is expected to become more widespread in the coming decades as the human population increases and climate and land use change commensurately, placing increasing pressures on freshwaters [2,3,4]; although, there is also recognition that eutrophication or its response to management actions does not progress in the same way in all lakes (e.g., [5,6,7]). Most research to understand lake nutrients and their effects on algae, plants, and aquatic food webs has been conducted in individual or small groups of lakes by studying the complex within-lake mechanisms that control responses to nutrients (e.g., [8,9]). Such relationships and interactions have also been found to be influenced by the ecological context of lakes (i.e., the land use, geologic, climatic, and hydrologic setting of lakes), which varies by lake and region, and is multi-scaled. In fact, it is not always clear whether local or regional ecological context matters more for predicting lake eutrophication (e.g., [10,11,12]). Therefore, determining the current extent of lake eutrophication and predicting how eutrophication will respond to future global change requires water quality data (e.g., nutrients, water clarity, and chlorophyll concentrations) and measures of lake ecological context across regions, the continent, and the globe (e.g., 13,14,15).

In practice, measures of water quality are often collected from a relatively small number of lakes within individual regions. In the U.S., large investments have been made in water quality monitoring by federal, state, local, and tribal governments; and, many, but not all, of the datasets have been placed in government data repositories such as the USGS National Water Information System (NWIS) and the USEPA Storage and Retrieval (STORET) database. Unfortunately, these data repositories do not currently allow us to study lake water quality at broad scales. Despite the large number of water quality records in these systems, a recent analysis of stream nutrient data obtained from NWIS, STORET, and more than 400 other organizations determined that over half of the data records lacked the most critical metadata necessary to make the data usable (e.g., chemical form, parameter name, units; [16]); and, we would expect a similar result with lake data because they are typically treated similarly to stream nutrient data. In addition, STORET and NWIS do not include any measures of lake ecological context. Therefore, to study the controls of eutrophication specifically, and water quality in general, requires development of a comprehensive database for lake water quality that is integrated with measures of lake ecological context and sufficient metadata for robust analysis.

We created a database called LAGOS-NE, the ‘lake multi-scaled geospatial and temporal database’ for thousands of inland lakes in 17 of the most lake-rich states in the upper midwest and northeastern U.S. (Figure 1). We avoided the problem of lack of metadata for the water quality data by contacting the original data providers for water quality data, asking for metadata, and only including data for which sufficient metadata were available. We addressed the problem of lack of ecological-context data by creating our own database of lake ecological context. The detailed methods and approach for building this database have been published previously [17]; here we publish and describe the database for the 51,101 lakes and reservoirs  $\geq 4$  ha in the study area (1,800,000 km<sup>2</sup>).

We had three related motivations for developing this database: (1) to facilitate further development of our basic understanding of lake water quality at broad scales using water quality data on thousands of lakes collected over the last several decades (see [11,17] for details); (2) to build the capacity to apply this scientific understanding to environmental management and policy of inland waters; and, (3) to foster broad-scale research by designing an open-science database that is extensible for future uses and by making the data and methods publicly accessible.

**Figure 1. Map of the study extent of LAGOS-NE.** Map includes 17 states in the upper midwest and northeastern U.S. outlined in white and 51,101 lakes  $\geq 4$  ha shown as blue polygons. Some lakes extend beyond state borders and are included in the database if it was possible to delineate their watersheds. Watershed boundaries rather than state boundaries were used for all analyses of lakes, streams, and wetlands. The map is modified from [17].

1  
2  
3  
4 195  
5 196 LAGOS-NE comprises three data modules that, although integrated in the same database, were  
6 197 derived using different data sources and data integration methods, and thus must be version-controlled  
7 198 separately. LAGOS-NE<sub>LOCUS</sub> v1.01 includes lake location and physical characteristics based on an  
8 199 existing national-scale database of lake and streams in the U.S. for all lakes. LAGOS-NE<sub>GEO</sub> v1.05  
9 200 includes measures of land, water, and air (ecological context) obtained from existing national scale GIS  
10 201 (geographic information system) datasets and measured in multiple zones (delineated by different spatial  
11 202 classifications) around all lakes. This module also contains some temporal data for climate, land  
12 203 use/cover, and atmospheric deposition variables. LAGOS-NE<sub>LIMNO</sub> v1.087.1 includes in-situ  
13 204 measurements of lake water quality for a subset of the above lakes. These 87 datasets of lake water  
14 205 quality were obtained from a combination of sources including government, tribal agencies, university  
15 206 researchers, citizen scientists, and non-profit agencies. Samples were taken during any season of the year  
16 207 from the most recent decades, mostly from the late 1980's to 2012.

17 208 The largest challenge in building LAGOS-NE was the heterogeneity of the dataset formats,  
18 209 variable conventions and units, and metadata, none of which were standardized. Many steps of data  
19 210 integration required manual input from experts in diverse fields and close collaboration among specialists  
20 211 in ecoinformatics, database design, freshwater ecology, and geography; all combined, the effort took six  
21 212 years and involved ~15 individuals, spread across numerous institutions.

22 213 We designed the database using principles of open science so futures users could ask new  
23 214 research questions by using the existing database or adding new data modules to the database. To ensure  
24 215 users could do this, we documented the major steps of dataset integration and carefully integrated  
25 216 metadata directly into the database itself, we emphasized data provenance, and we used a database  
26 217 versioning system. In this data paper, we make the following research products available: (1) data tables  
27 218 with the data that make up LAGOS-NE and an R package for accessing the data and integrating the  
28 219 tables; (2) for each of the 87 water quality datasets, we provide the EML (ecological metadata language)  
29 220 metadata files that we authored after receiving the data, the data files that we processed to import into  
30 221 LAGOS-NE, and the R-script that we wrote to process the data; and (3) GIS coverages of the underlying  
31 222 freshwater geographic features (lakes, streams and wetlands) that are linked to the data tables for GIS  
32 223 processing by researchers.  
33 224

## 34 225 **2. Study site: Midwest and Northeast U.S. lakes**

35 226 We selected an area of the U.S. known to have large numbers of lakes, well-developed lake water  
36 227 quality sampling programs, and that spans diverse geographic conditions and thus gradients of ecological  
37 228 context (Table 1). Our study area of 17 U.S. states includes 51,101 lakes  $\geq 4$  ha (Figure 1). These states  
38 229 are in the north temperate climatic zone, which experience cold winters and warm, humid summers. The  
39 230 study area includes part of the Interior Plains, Laurentian Uplands, Appalachian Highlands, and Atlantic  
40 231 Plain geological provinces, and thus encapsulates a range of geological ages, glacial histories, and  
41 232 topography. Land use/cover is highly variable, ranging from regions of intense agriculture in the corn belt  
42 233 that spans portions of Minnesota, Wisconsin, Iowa, Missouri, Indiana, and Ohio, to predominantly  
43 234 forested or urban regions of the northeastern U.S., including the states of Maine, New Hampshire, New  
44 235 Jersey, and parts of New York, and primarily forested regions of northern Minnesota, Wisconsin, and  
45 236 Michigan.

46 237 Although the majority of the data that we provide are for lakes  $\geq 4$  ha (see below for reasons for  
47 238 using this threshold), we do include some data on lakes  $\geq 1$  ha and  $< 4$  ha if data were available. Although  
48 239 there may be water quality data for some lakes in this smaller size range, ecological context variables are  
49 240 not available for these lakes.  
50 241  
51 242  
52 243  
53 244  
54 245

**Table 1: Summary statistics for LAGOS-NE study area.**

| State         | Area (km <sup>2</sup> ) | Number of lakes (≥4 ha) | Mean annual temperature (°C) | Mean annual precipitation (mm) | % Agricultural land | % Urban land | % Forested land | % Wetland |
|---------------|-------------------------|-------------------------|------------------------------|--------------------------------|---------------------|--------------|-----------------|-----------|
| Connecticut   | 12,878                  | 763                     | 9.7                          | 1253                           | 7.2                 | 24.4         | 54.5            | 9.0       |
| Illinois      | 145,920                 | 2,819                   | 11.3                         | 1005                           | 68.9                | 11.9         | 15.0            | 1.7       |
| Indiana       | 93,717                  | 1,874                   | 11.2                         | 1072                           | 62.0                | 10.8         | 22.5            | 1.5       |
| Iowa          | 145,736                 | 903                     | 9.1                          | 881                            | 78.0                | 7.5          | 6.9             | 1.9       |
| Maine         | 84,123                  | 2,645                   | 5.1                          | 1149                           | 3.7                 | 3.5          | 66.9            | 12.1      |
| Massachusetts | 21,013                  | 1,698                   | 8.9                          | 1235                           | 5.8                 | 25.2         | 50.1            | 12.2      |
| Michigan      | 150,489                 | 6,511                   | 7.2                          | 841                            | 26.2                | 10.6         | 35.5            | 19.2      |
| Minnesota     | 218,543                 | 13,984                  | 5.3                          | 709                            | 44.7                | 5.7          | 19.7            | 19.0      |
| Missouri      | 180,537                 | 1,858                   | 12.7                         | 1100                           | 50.7                | 7.0          | 36.6            | 2.1       |
| New Hampshire | 23,980                  | 1,109                   | 6.5                          | 1209                           | 3.8                 | 7.9          | 74.5            | 6.4       |
| New Jersey    | 19,599                  | 1,143                   | 11.8                         | 1188                           | 13.8                | 31.1         | 27.9            | 21.4      |
| New York      | 126,070                 | 4,461                   | 7.6                          | 1094                           | 21.9                | 9.3          | 54.1            | 7.2       |
| Ohio          | 106,917                 | 1,279                   | 10.6                         | 1003                           | 50.0                | 14.7         | 30.9            | 1.0       |
| Pennsylvania  | 117,293                 | 1,755                   | 9.3                          | 1109                           | 22.7                | 12.3         | 59.5            | 1.6       |
| Rhode Island  | 2,809                   | 253                     | 10.0                         | 1246                           | 4.9                 | 29.5         | 44.6            | 13.6      |
| Vermont       | 24,913                  | 528                     | 5.9                          | 1176                           | 13.3                | 5.5          | 70.0            | 4.7       |
| Wisconsin     | 145,295                 | 6,009                   | 6.6                          | 831                            | 36.7                | 7.5          | 35.5            | 13.7      |

This table includes numbers of lakes and geophysical setting of each state and state averages for climate and the 4 major land use/cover types, which do not add up to 100% because we do not include all cover types. Temperature and precipitation data are 30 year climate normals (1981-2010; PRISM, <http://www.prism.oregonstate.edu/normals/>); land use/cover data are from the 2011 National Land Cover Database (NLCD; USGS, <http://www.mrlc.gov>). Note, border lakes are only counted in one state.

### 3. Overview of LAGOS-NE

LAGOS-NE includes some data on all lakes in a study area (above the minimum lake area threshold, which was 4 ha), which we call the ‘census’ population of lakes. The census population of lakes is a critical feature of LAGOS-NE because it allows us to characterize the ecological context of every lake in our study population and to identify whether the lakes for which we have water quality data are biased in any way. LAGOS-NE includes three main categories of variables: (1) variables that describe the physical characteristics and location of lakes themselves; (2) variables that describe in-situ water quality; and (3) variables that describe a lake’s ecological context at multiple scales, and across multiple dimensions (such as hydrology, geology, land use, climate, etc.) based on the principles of landscape limnology [18,19,20,12]. Three factors dictated which data were included: past research and theory about the spatial and temporal controls of lake water quality, data availability and quality, and the time and resources necessary to compile, integrate, or process the original data. In other words, data that were especially time- and resource-intensive to collate, integrate, or process were given lowest priority and in some cases, were not ultimately incorporated into the database.

There was a number of constraints for each of the categories of data that had to be considered. For creating the census population of lakes (i.e., their geospatial location, perimeter, and surface area), we relied on a single source of data (the 1:24,000 National Hydrography Dataset (NHD) [21]). For the in-situ water quality data, we incorporated data only if they were in a digitally-accessible format such as a text or spreadsheet file. Finally, for the ecological-context variables, we included only data for which we could obtain a GIS or raster coverage at the national or state scale for all 17 states.

We organized these three categories of data into database ‘modules’ that had similar data types and sources so that we could develop procedures and set standards for each module (Figure 2). The module structure also facilitates data reuse and extension by accommodating future data modules related to any other lake or ecological-context feature.

1  
2  
3  
4 280  
5 281 **Figure 2. LAGOS-NE data modules and version numbers.** The data modules and versions that are included in  
6 282 LAGOS-NE and are available with this paper include: LAGOS-NE<sub>GEO</sub> v.1.05, LAGOS-NE<sub>LOCUS</sub> v.1.01 (note, that in  
7 283 Soranno et al. [17], this module was called LAGOS-lakes), and LAGOS-NE<sub>LIMNO</sub> v.1.087.1. We include descriptions  
8 284 of the type of data that are included in each module; with the major categories of variables the same as those  
9 285 describing the data tables in Additional File 1. The black connectors among the modules show that the modules are  
10 286 connected to each other through common unique identifiers through the LAGOS-NE<sub>LOCUS</sub> module (through the  
11 287 unique lake ID). P is phosphorus, N is nitrogen, C is carbon, S is sulfur, atm is atmospheric, NHD is the National  
12 288 Hydrography Dataset, IWS is the interlake watershed, WBD is the Watershed Boundary Dataset, EDU is Ecological  
13 289 Drainage Unit. Figure is modified from Figure 1 in Soranno et al. [17].  
14 290  
15 291

16 292  
17 293 The design of LAGOS-NE and the workflow for its construction have been described previously  
18 294 in detail [17]. In particular, the database design is based on the Consortium of Universities for the  
19 295 Advancement of Hydrologic Science, Inc. (CUAHSI) Community Observations Data Model (ODM)  
20 296 (CUAHSI ODM) as described in [17]. Here, we provide a brief overview. One important guiding  
21 297 principle in creating LAGOS-NE was to ensure data provenance, i.e., that we could trace the original  
22 298 source data through to the final LAGOS-NE database. Because each data module had different types of  
23 299 source data, we developed different procedures for data provenance for each module, described in  
24 300 Soranno et al. [17] and in this paper. The database model is based on ODM because it is a flexible data  
25 301 model (i.e., allows the incorporation of wide range of types of data) that allows for the incorporation of  
26 302 controlled vocabulary and, importantly, allows for extensive documentation through a relational database  
27 303 structure of linked tables containing metadata [17]. The database was created and is maintained in  
28 304 PostgreSQL v9.1. However, for researchers to use the database for analysis and modeling, it is necessary  
29 305 to export the data into tables that can be processed by statistical packages or computer code. Therefore,  
30 306 we exported the data into a series of tables (of similar data) that are needed to conduct research on either  
31 307 the census population of lakes, the lakes for which there are water quality data, or some combination.  
32 308 These are the data files that have been used to conduct research on LAGOS-NE to date, and that we make  
33 309 available in this data paper (see Additional File 1 for a list of the tables and associated data that we are  
34 310 making available). Further, we also make our GIS datasets available to facilitate geospatial analyses of  
35 311 lakes, streams, and wetlands used to create some of the major components of LAGOS-NE.  
36 312  
37 313

#### 40 314 **4. Description of LAGOS-NE<sub>LOCUS</sub> v1.01 data module**

41 315 The LAGOS-NE<sub>LOCUS</sub> module includes data on the physical location, some features and unique  
42 316 identifiers for all lakes in the study area  $\geq 1$  ha, which means this data file has information on 141,378  
43 317 lakes. Note, that because we detected errors in the digitization of lakes between 1 and 4 ha, we have  
44 318 chosen to define our census population of lakes as only those  $\geq 4$  ha, but we still make data available for  
45 319 lakes smaller than 4 ha when available in this and the LAGOS-NE<sub>LIMNO</sub> data module. However, we  
46 320 recommend caution in analyses, interpretation, and inference for lakes  $< 4$  ha in this database that depend  
47 321 on NHD's spatial representation and detection of water bodies. The data in this module include: lake  
48 322 unique identifiers, perimeter, area, latitude and longitude (which is typically the centroid of the lake or a  
49 323 central point that is within the lake boundary), GNIS name, and the zone IDs that the lake is located  
50 324 within (e.g., state, county, or hydrologic units). The GIS datasets that we also make available provide the  
51 325 lake polygon features associated with this module, as well as coverages for: lake watersheds, streams,  
52 326 wetlands, spatial classifications, and glaciation history.

53 327 Definition of lakes: We defined lakes previously in Soranno et al. [17] as follows. A 'lake' in  
54 328 LAGOS-NE is a perennial body of relatively still water. We include lakes and reservoirs that range from  
55 329 being completely natural to highly modified: lake basins can be entirely natural, modified natural (i.e., a  
56 330 water control structure on a natural lake), or a fully impounded stream or river (i.e., a reservoir). We  
57 331 explicitly exclude: sewage treatment ponds, aquaculture ponds, and detention ponds that are known to  
58 332  
59 333  
60  
61  
62  
63  
64  
65

1  
2  
3  
4 331 contain basins that are entirely artificial and were built for high-intensity human use. In addition, due to  
5 332 their unusual nature and size, we do not include the five Great Lakes in our database. This definition of  
6 333 'lake' for LAGOS-NE has been developed only for the purpose of this database and its applications (e.g.,  
7 334 to answer questions about lake water quality). The intent of LAGOS-NE is not to document and measure  
8 335 the total number of water bodies in our study area, although we are able to perform this calculation for  
9 336 lakes  $\geq 4$  ha, with an acceptable level of uncertainty (see below).

10 337 Definition of lake watersheds: We calculated lake watersheds as 'inter-lake watersheds' (IWSs)  
11 338 defined as the area of land draining directly into the lake as well as the area that drains into upstream-  
12 339 connected streams and lakes  $< 10$  ha (Figure 3). We defined lake watersheds this way to define the  
13 340 drainage basin of lakes that includes connected streams and their drainage basins. However, because  
14 341 research has shown that large upstream lakes can trap nutrients flowing into them, these large lakes can  
15 342 block nutrient transport of nutrients that originate upstream from them to downstream lakes in a  
16 343 connected lake chain (e.g., [22]). Therefore, to calculate a drainage basin for a lake with large upstream  
17 344 connected lakes, we did not include the drainage basins of upstream lakes  $> 10$  ha. See Soranno et al. [17]  
18 345 for full details on how lake IWSs were calculated and the section on LAGOS-NE<sub>GEO</sub> for further details.

19 346 Lakes near and beyond the state borders: For some of our analyses, we delineated boundaries in  
20 347 other ways than political boundaries that were more ecologically relevant, which resulted in the inclusion  
21 348 of some lakes outside of the exact 17 state border. This fact allowed us to include more in situ data  
22 349 collected by state and citizen sampling programs which do not always follow strict state borders and may  
23 350 include lakes that are outside of state lines. Although most of these border lakes have hydrological (i.e.,  
24 351 lake connectivity measures) and topographic (i.e., lake watershed delineations) calculations or water  
25 352 quality data, some measures of ecological context may be missing. For example, for lakes in Canada, we  
26 353 were not able to estimate any data that relied on national datasets that stopped at the Canadian border; one  
27 354 exception is the NHD, which extends into Canada to retain hydrologic boundaries.

#### 31 355 **Data sources of the LAGOS-NE<sub>LOCUS</sub> module**

32 356 Detailed information on data sources are found in 'Additional File 5' in Soranno et al. [17]. Briefly, the  
33 357 data source for lakes and streams in the 17 state area was the NHD [21]. The hydrologic boundaries (i.e.,  
34 358 for three of the spatial classifications, HUC12, HUC8, HUC4) came from the Watershed Boundary  
35 359 Dataset (WBD; [23]). In addition, we used the digital raster dataset of elevation for watershed delineation  
36 360 from the National Elevation Dataset [24]. All download dates for these data sources are provided in  
37 361 'Additional File 5' in the above citation.

#### 38 362 **Data-integration methods of the LAGOS-NE<sub>LOCUS</sub> module**

39 363 All methods to create this module are described in Soranno et al. [17]. The most challenging and time-  
40 364 consuming part of building this module was connecting the sampling locations from the lake water  
41 365 quality datasets (which each contained different types of unique identifiers, and sometimes only lake  
42 366 names) to a georeferenced location in the NHD. When data providers included the lake latitude and  
43 367 longitude, we were able to mostly automate the procedure. Nevertheless, even when coordinates were  
44 368 available, there were many cases where the latitude and longitude did not intersect the NHD lake polygon  
45 369 boundary, requiring manual interpretation.

46 370 **Figure 3. Examples lake watersheds (IWS) in LAGOS-NE.** The watersheds are coded by hydrologic class to  
47 371 which its lake belongs. Data are from the LAGOS-NE<sub>GEO</sub> v.1.01 data module and the GIS data coverages.

#### 48 372 **Quality Control of the LAGOS-NE<sub>LOCUS</sub> module**

49 373 The full description of error analysis for this module is described in Soranno et al. [17]. However,  
50 374 here we briefly describe our efforts to determine the minimum area of a lake that we could confidently  
51 375  
52 376  
53 377  
54 378  
55 379  
56 380  
57 381

represent using the NHD (further details located in Additional File 9 in Soranno et al. [17]). Although the NHD is a national dataset, it is updated and edited regionally (often at the state level) by local practitioners familiar with each study region. As a result, there are regional differences in the resolution and digitization of water bodies, particularly for small water bodies, making it difficult to quantify or document even nominal error rates, or rather, the minimum lake size that is well-represented in the NHD. It has been documented previously that the NHD may not successfully identify small water bodies due to a variety of reasons including the resolution of the original underlying data of the NHD database, errors in digitization, hydrologic changes since the time of map creation (e.g., [25, 26]). Because of these documented issues, some programs have set minimum lake area cutoffs for sampling lakes. Most notable is the EPA-National Lakes Assessment of 2007, which chose a minimum size of 4 ha; although a smaller size cutoff was chosen for the EPA-National Lakes Assessment of 2012 [27]. To determine an appropriate size cutoff for our purposes, we conducted an analysis to identify the lakes that are best represented by the NHD across the LAGOS-NE study area.

We selected four states (WI, MI, IA, ME) in which to evaluate error rates of water body identification for lakes  $\geq 1$  ha and seven states (WI, MI, IA, ME, MO, NH, OH) in which to evaluate error rates for lakes  $\geq 4$  ha. We randomly selected three 100-km<sup>2</sup> rectangles from each state then compared the number of lakes occurring in the NHD GIS coverage to the number of lakes in the best available aerial imagery from a range of sources to calculate the percentage of lakes missing from the NHD. The average percentage of lakes missing from the NHD was 58% for the  $\geq 1$  ha four-state test and 13% for the  $\geq 4$  ha seven-state test. Because an average of 87% of lakes  $\geq 4$  ha that are present in high-resolution aerial imagery are also present in the NHD, we chose this surface area as our cut-off and accepted this error rate.

#### **Data in the LAGOS-NE<sub>LOCUS</sub> module**

Figure 1 shows the census population of all lakes  $\geq 4$  ha in the 17-state area, including border areas beyond the 17-state boundary. As expected, the lakes are not evenly distributed, with higher densities in the northern parts of the study area. For those lakes with known lake depth (9,808 lakes with maximum depth values, and 4,090 lakes with mean depth values), there is little regional pattern of lake depth; shallow and deep lakes are found throughout the study area (see [28] for further details). Watershed size varies greatly across the study extent, reflecting the wide range of different lake hydrologic types and connections to upstream water bodies (Figure 3). In fact, the proportion of lakes in different lake hydrologic connectivity classes varies regionally across our study extent (Table 2; see [29] for further details).

**Table 2. Numbers of lakes in each state by lake hydrologic class**

| State         | Lakes $\geq 4$ ha (#) | Isolated Lakes (#) | Headwater lakes (#) | Drainage lakes (#) | Drainage lakes with upstream lakes (#) |
|---------------|-----------------------|--------------------|---------------------|--------------------|----------------------------------------|
| Connecticut   | 770                   | 40                 | 119                 | 424                | 187                                    |
| Illinois      | 2,831                 | 1,417              | 279                 | 952                | 183                                    |
| Indiana       | 1,883                 | 760                | 244                 | 697                | 182                                    |
| Iowa          | 915                   | 339                | 87                  | 402                | 87                                     |
| Maine         | 2,661                 | 94                 | 619                 | 1,211              | 737                                    |
| Massachusetts | 1,716                 | 210                | 269                 | 751                | 486                                    |
| Michigan      | 6,531                 | 2,649              | 1,087               | 1,672              | 1,123                                  |
| Minnesota     | 14,031                | 6,609              | 1,894               | 2,673              | 2,855                                  |
| Missouri      | 1,865                 | 435                | 179                 | 1,113              | 138                                    |
| New Hampshire | 1,118                 | 70                 | 224                 | 581                | 243                                    |
| New Jersey    | 1,148                 | 219                | 129                 | 521                | 279                                    |
| New York      | 4,477                 | 629                | 1,210               | 1,915              | 723                                    |
| Ohio          | 1,282                 | 543                | 105                 | 520                | 114                                    |
| Pennsylvania  | 1,757                 | 316                | 397                 | 840                | 204                                    |
| Rhode Island  | 266                   | 35                 | 40                  | 115                | 76                                     |
| Vermont       | 531                   | 14                 | 74                  | 364                | 79                                     |
| Wisconsin     | 6,026                 | 2,982              | 823                 | 1,236              | 985                                    |
| <b>Total</b>  | <b>49,808</b>         | <b>17,361</b>      | <b>7,779</b>        | <b>15,987</b>      | <b>8,681</b>                           |

1  
2  
3  
4 417 The number (#) of lakes  $\geq 4$  ha in each of the lake hydrologic classes by state, as well as the total numbers of lakes  
5 418 by hydrologic class calculated for the study extent. Note, in this table, lakes are counted for each state in which they  
6 419 occur (i.e., lakes that straddle two states are counted in both states).  
7  
8

## 9 421 **5. Description of LAGOS-NE<sub>LIMNO</sub> v1.087.1 data module**

10 422  
11 423 The LAGOS-NE<sub>LIMNO</sub> module includes in situ measurements of lake water quality. We included  
12 424 variables that are most commonly measured by state agencies and researchers for studying eutrophication  
13 425 (Figure 2, **Water quality data and metadata**, including chlorophyll a, Secchi depth, water color, DOC,  
14 426 total and dissolved phosphorus (P), nitrogen (N), and carbon (C)). For each water quality data value, we  
15 427 also include metadata as additional columns in the exported data table (Figure 2, **Metadata** including  
16 428 analytical method, data qualifier from the program, detection limit (when available), and the LAGOS-NE  
17 429 sensor code) including: the analytical methods, qualifiers with data flags from the original program (*qual*,  
18 430 which is not standardized for LAGOS-NE), detection limits (if available), and standardized sensor codes  
19 431 from our quality control procedures (*sensorcode*, standardized for LAGOS-NE). Finally, we include  
20 432 documentation about each source program that is linked to each data value.  
21 433

### 22 433 23 434 Data sources of the LAGOS-NE<sub>LIMNO</sub> module

24 435 We acquired individual water quality datasets for LAGOS-NE<sub>LIMNO</sub> by contacting individuals at  
25 436 each of the 17 state and 5 tribal agencies. These contacts helped us to identify the state-agency collected  
26 437 dataset required by the Clean Water Act and which is most likely to be in the public domain. In this way,  
27 438 we were able to acquire at least one (and typically more) dataset from each of the 17 states. Because state  
28 439 and tribal agencies vary in sampling approach and intensity (see below for details), we sought to  
30 440 supplement these datasets with other known sources of water quality data, including university  
31 441 researchers, federal agencies, and non-profit groups to integrate into the LAGOS-NE<sub>LIMNO</sub> module. The  
32 442 full list of data sources acquired is in Soranno et al. [17] in ‘Additional File 17’; however, we  
33 443 incorporated a subset of these datasets in LAGOS-NE<sub>LIMNO</sub> v1.087.1 (the data file  
34 444 *LAGOSNE\_source\_program\_10871.csv* contains the list of sources for this version of LAGOS-NE).  
35 445

### 36 445 37 446 Data-integration methods of the LAGOS-NE<sub>LIMNO</sub> module

38 447 All methods to create this module are described in Soranno et al. [17]. Briefly, for each dataset acquired,  
39 448 we authored LAGOS-NE metadata in EML to aid in data provenance (included in this paper). We also  
40 449 incorporated key metadata features (e.g., methods used, sensor codes (if applicable)), and sampling  
41 450 program information) into the database so that future users could easily identify these important  
42 451 attributes. Because each dataset was unique in structure, file format, and naming conventions, we  
43 452 manually processed each dataset and its metadata so that they could be translated into the standard  
44 453 LAGOS-NE vocabulary and data model. Although labor-intensive, we created customized R scripts to  
45 454 process and load each dataset separately (included in this data paper).  
46 455

### 47 455 48 456 Quality control of the LAGOS-NE<sub>LIMNO</sub> module

49 457 The full description of our quality assurance/quality control (QAQC) procedures for this module are  
50 458 described in Additional File 2. Here, we provide a brief overview of our approach. Our goal for this effort  
51 459 was to identify egregiously high values and values that might be too low, both defined below. Note that  
52 460 our quality control procedures were not designed to identify statistical outliers, which individual users are  
53 461 expected to perform themselves because such analyses depend on the subsequent statistical analysis of  
54 462 each user. There were three major phases in the QAQC procedure for LAGOS-NE<sub>LIMNO</sub>. Phases I and II  
55 463 were designed to identify the egregious values that we defined as those that: (1) did not make ecological  
56 464 sense, (2) were far beyond what has been detected in previous studies, (3) were not technically feasible  
57 465 (e.g., SRP > TP), or (4) were a result of a data or file corruption or error in the data loading stage. For  
58 466 these egregious values, we explored the issues that might be underlying the values and removed them  
59 467 from the LAGOS-NE<sub>LIMNO</sub> data export provided in this data paper because we had sufficient evidence that  
60  
61  
62  
63  
64  
65



1  
2  
3  
4 468 they were not scientifically valid data values. We were very conservative in these assessments to avoid  
5 469 removing data values that were high, yet still valid. Phase III was designed to identify and flag values that  
6 470 seemed to be lower than analytically possible (i.e., below detection limits) when there was sufficient  
7 471 metadata; however, note that these data are still provided in this data paper because it is not appropriate to  
8 472 remove data that are below detection when those data could be valid.

9 473 For all versions of LAGOS-NE<sub>LIMNO</sub>, Phase I and II are conducted on the entire cumulative  
10 474 dataset to leverage as large of a sample size as possible to detect problem values. In other words, because  
11 475 many of the QAQC analyses outlined here make use of all information from an individual lake or  
12 476 variable, incorporating new data may result in a better assessment of the data than when there are less  
13 477 data. Thus, for each new version of LAGOS-NE<sub>LIMNO</sub>, new decisions are made about egregious values. In  
14 478 this data paper, we describe the procedures for assessing all major versions of LAGOS-NE<sub>LIMNO</sub>, but we  
15 479 present the results only for this version of LAGOS-NE<sub>LIMNO</sub> (v1.087.1).

16 480 Because there are few accepted practices for conducting such quality control on a large,  
17 481 integrated database, we created our own procedures for Phase I and II by creating tests to identify  
18 482 egregious values that leverage a large, integrated database with multiple measures of water quality and  
19 483 well-established expected relationships among variables. The database that we used to identify egregious  
20 484 values was based on data in the full LAGOS-NE<sub>LIMNO</sub> database for samples taken from all lake depths  
21 485 provided by the source datasets (note, our data exports in this data paper are only for epilimnetic or  
22 486 surface samples). While the quality control procedures that we implemented here were designed to help  
23 487 resolve the large and egregious errors in a combined dataset such as this, there are likely additional  
24 488 extreme values in the database due to the size and heterogeneity of the data. Users may want to check for  
25 489 additional issues in the data values specific to their intended analyses.

#### 26 490 27 491 **Data in the LAGOS-NE<sub>LIMNO</sub> module**

28 492 All data in LAGOS-NE<sub>LIMNO</sub> v1.087.1 are from samples that we identified as being collected  
29 493 from either the lake surface or the epilimnion (the well-mixed surface layer of a thermally-stratified lake  
30 494 during the period of stratification). Because we did not have lake temperature data to quantify the exact  
31 495 epilimnion depth in all lakes, we used information from the source datasets to either determine epilimnion  
32 496 depth, or to select data from only the top water layers. Although we received data from different depths in  
33 497 lakes, the majority of the samples were from the surface or epilimnion. The database includes samples  
34 498 from any season of the year. However, most of the published analyses to date have focused on the  
35 499 summer stratified period.

36 500 Lakes are not sampled the same way by all individuals, groups, or agencies; there are differences  
37 501 in the variables measured, the frequency and timing of sampling, and the proportion of lakes sampled. For  
38 502 example, for total phosphorus, the four states with the largest number of unique lakes with at least one  
39 503 value for total phosphorus per state include: Wisconsin (1,920 lakes), Minnesota (1,588), New York  
40 504 (1,289), and Michigan (1,109) (Table 3). However, the states with the highest proportion of their lakes  
41 505 with total phosphorus samples are the smaller states with fewer numbers of lakes, such as New  
42 506 Hampshire (64%), Vermont (58%), and Rhode Island (42%). Notably, there are some states with  
43 507 intermediate numbers of lakes that still have quite large percentages of their lakes with total phosphorus  
44 508 values, including Maine (35% of 2,645 lakes), Wisconsin (32% of 6,009 lakes), and New York (29% of  
45 509 the 4,461 lakes).

46 510 The most commonly measured variable in LAGOS-NE<sub>LIMNO</sub> is water clarity measured as Secchi  
47 511 depth (a relatively easy and cost-effective measure of water quality), with 897,724 measurements taken  
48 512 from 12,034 unique lakes in the 17 states from mostly the mid 1980s to 2011 (Table 3). The second and  
49 513 third most sampled measures of water quality are chlorophyll *a* and total phosphorus, respectively.  
50 514 Although it appears that total nitrogen is sampled far less frequently than total phosphorus, some labs  
51 515 measure total nitrogen directly and report that single value, whereas other labs measure the constituents  
52 516 that make up total nitrogen (total Kjeldahl nitrogen and nitrate+nitrite), and sum them together to  
53 517 calculate total nitrogen. All of our analyses conducted on total nitrogen have used such calculated and  
54 518 measured values of nitrogen together, which increase the sample sizes for total nitrogen markedly.

1  
2  
3  
4  
5  
6  
7  
8  
9  
10  
11  
12  
13  
14  
15  
16  
17  
18  
19  
20  
21  
22  
23  
24  
25  
26  
27  
28  
29  
30  
31  
32  
33  
34  
35  
36  
37  
38  
39  
40  
41  
42  
43  
44  
45  
46  
47  
48  
49  
50  
51  
52  
53  
54  
55  
56  
57  
58  
59  
60  
61  
62  
63  
64  
65

519           Most of our data came from state agencies, either alone or as part of joint programs with citizen  
520 scientists or university researchers (Table 4), which highlights the importance of citizen science programs  
521 for monitoring lake water quality in this lake-rich area of the U.S.

14  
15  
16  
17  
18  
19  
20 522  
21 523  
22  
23  
24

**Table 3. Summary of the water quality variables and the number of values per variable by state.**

| State         | Number of lakes (≥4 ha) | Variable            | Total phosphorus | Secchi depth | Chlorophyll a | True color | Apparent color | Dissolved organic carbon | Total nitrogen | Total Kjeldahl nitrogen | Nitrate + nitrite |
|---------------|-------------------------|---------------------|------------------|--------------|---------------|------------|----------------|--------------------------|----------------|-------------------------|-------------------|
| Connecticut   | 763                     | # of samples:       | 1294             | 1943         | 1160          | 53         | 0              | 74                       | 853            | 55                      | 397               |
|               |                         | # of sampled lakes: | 143              | 168          | 149           | 37         | 0              | 49                       | 99             | 26                      | 81                |
|               |                         | sample years:       | 1972-2010        | 1937-2010    | 1937-2013     | 1984-2007  | n/a            | 1984-2007                | 1973-2010      | 1999-2009               | 1976-2010         |
| Illinois      | 2819                    | # of samples:       | 2816             | 2317         | 1438          | 20         | 0              | 20                       | 43             | 1526                    | 2351              |
|               |                         | # of sampled lakes: | 191              | 185          | 167           | 17         | 0              | 17                       | 18             | 155                     | 188               |
|               |                         | sample years:       | 1999-2011        | 1999-2011    | 2000-2011     | 2007       | n/a            | 2007                     | 2001-2009      | 1999-2006               | 1999-2009         |
| Indiana       | 1874                    | # of samples:       | 1232             | 1303         | 909           | 57         | 0              | 57                       | 57             | 1183                    | 1237              |
|               |                         | # of sampled lakes: | 341              | 340          | 320           | 51         | 0              | 51                       | 51             | 322                     | 341               |
|               |                         | sample years:       | 1988-2010        | 1986-2010    | 1990-2009     | 2007       | n/a            | 2007                     | 2007           | 1988-2009               | 1988-2009         |
| Iowa          | 903                     | # of samples:       | 2873             | 2836         | 2711          | 18         | 0              | 18                       | 2244           | 6                       | 2229              |
|               |                         | # of sampled lakes: | 111              | 111          | 103           | 12         | 0              | 16                       | 111            | 1                       | 111               |
|               |                         | sample years:       | 1997-2011        | 1997-2011    | 1997-2011     | 2007       | n/a            | 2007                     | 2001-2011      | 2008-2009               | 2001-2011         |
| Maine         | 2645                    | # of samples:       | 17314            | 83472        | 12480         | 1927       | 1676           | 3321                     | 1260           | 8                       | 1577              |
|               |                         | # of sampled lakes: | 933              | 1047         | 793           | 601        | 466            | 848                      | 461            | 3                       | 347               |
|               |                         | sample years:       | 1971-2011        | 1952-2011    | 1974-2011     | 1983-2011  | 1972-2011      | 1984-2011                | 1995-2011      | 1978-1993               | 1978-2011         |
| Massachusetts | 1698                    | # of samples:       | 570              | 760          | 326           | 277        | 228            | 300                      | 69             | 69                      | 351               |
|               |                         | # of sampled lakes: | 211              | 249          | 122           | 122        | 89             | 140                      | 37             | 4                       | 132               |
|               |                         | sample years:       | 1978-2013        | 1978-2010    | 1986-2010     | 1984-2013  | 1978-2010      | 1984-2010                | 2000-2010      | 1978-2013               | 1978-2013         |
| Michigan      | 6511                    | # of samples:       | 10143            | 95283        | 12243         | 1811       | 69             | 987                      | 749            | 2651                    | 4850              |
|               |                         | # of sampled lakes: | 1109             | 1233         | 862           | 836        | 69             | 353                      | 200            | 713                     | 948               |
|               |                         | sample years:       | 1965-2013        | 1925-2013    | 1959-2013     | 1973-2010  | 2002-2003      | 1984-2013                | 1959-2011      | 1980-2010               | 1973-2012         |
| Minnesota     | 13984                   | # of samples:       | 10974            | 497646       | 81925         | 406        | 6683           | 3382                     | 7717           | 43054                   | 7725              |
|               |                         | # of sampled lakes: | 1588             | 4118         | 2755          | 253        | 1368           | 811                      | 619            | 2018                    | 1522              |
|               |                         | sample years:       | 1944-2011        | 1938-2012    | 1970-2012     | 1981-2009  | 1949-2011      | 1984-2012                | 1945-2012      | 1944-2012               | 1945-2012         |
| Missouri      | 1858                    | # of samples:       | 11619            | 11794        | 11578         | 27         | 0              | 27                       | 11340          | 0                       | 27                |
|               |                         | # of sampled lakes: | 208              | 207          | 201           | 23         | 0              | 23                       | 207            | 0                       | 23                |
|               |                         | sample years:       | 1978-2013        | 1978-2013    | 1978-2013     | 2007       | n/a            | 2007                     | 1978-2013      | n/a                     | 2007              |
| New Hampshire | 1109                    | # of samples:       | 9289             | 2958         | 154           | 237        | 3044           | 390                      | 22             | 1209                    | 2445              |
|               |                         | # of sampled lakes: | 710              | 618          | 21            | 111        | 603            | 143                      | 17             | 535                     | 704               |
|               |                         | sample years:       | 1975-2013        | 1975-2011    | 1983-2012     | 1984-2010  | 1975-2010      | 1984-2010                | 2004-2010      | 1975-1994               | 1975-2013         |
| New Jersey    | 1143                    | # of samples:       | 421              | 461          | 446           | 27         | 0              | 44                       | 10             | 443                     | 472               |
|               |                         | # of sampled lakes: | 175              | 174          | 157           | 25         | 0              | 36                       | 8              | 157                     | 175               |
|               |                         | sample years:       | 1984-2009        | 1984-2009    | 2005-2009     | 1984-2007  | n/a            | 1984-2007                | 2007           | 2005-2009               | 1984-2009         |
| New York      | 4461                    | # of samples:       | 21356            | 21235        | 21000         | 27297      | 2287           | 13036                    | 8259           | 944                     | 27796             |
|               |                         | # of sampled lakes: | 1289             | 693          | 545           | 1421       | 47             | 1158                     | 258            | 279                     | 1279              |
|               |                         | sample years:       | 1975-2012        | 1975-2012    | 1975-2012     | 1981-2012  | 1984-2011      | 1982-2011                | 1990-2012      | 1981-2010               | 1975-2012         |
| Ohio          | 1279                    | # of samples:       | 377              | 1868         | 1912          | 20         | 0              | 220                      | 1873           | 0                       | 447               |
|               |                         | # of sampled lakes: | 144              | 144          | 137           | 19         | 0              | 44                       | 145            | 0                       | 40                |
|               |                         | sample years:       | 2006-2007        | 1992-2010    | 1992-2010     | 2007       | n/a            | 2006-2010                | 1994-2010      | n/a                     | 1993-2007         |
| Pennsylvania  | 1755                    | # of samples:       | 1170             | 924          | 971           | 163        | 0              | 160                      | 638            | 16                      | 290               |
|               |                         | # of sampled lakes: | 263              | 260          | 160           | 124        | 0              | 124                      | 167            | 2                       | 147               |
|               |                         | sample years:       | 1980-2011        | 1984-2011    | 1980-2011     | 1984-2008  | n/a            | 1984-2007                | 1997-2011      | 1985-2010               | 1980-2010         |

61  
62  
63  
64  
65

14  
15  
16  
17  
18  
19  
20  
21  
22  
23  
24  
25  
26  
27  
28  
29  
30  
31  
32  
33  
34  
35  
36  
37  
38  
39  
40  
41  
42  
43  
44  
45  
46  
47  
48  
49  
50  
51  
52  
53  
54  
55  
56  
57  
58  
59  
60  
61  
62  
63  
64  
65

|              |       |                            |               |               |               |              |              |              |              |              |              |
|--------------|-------|----------------------------|---------------|---------------|---------------|--------------|--------------|--------------|--------------|--------------|--------------|
| Rhode Island | 253   | # of samples:              | 3325          | 18211         | 12195         | 51           | 6            | 65           | 2582         | 0            | 2100         |
|              |       | # of sampled lakes:        | 106           | 107           | 102           | 27           | 1            | 32           | 99           | 0            | 102          |
|              |       | sample years:              | 1984-2010     | 1984-2010     | 1986-2010     | 1984-2007    | 2003-2010    | 1984-2010    | 1992-2010    | n/a          | 1984-2010    |
| Vermont      | 528   | # of samples:              | 13906         | 23894         | 15273         | 1774         | 1542         | 982          | 8            | 194          | 2271         |
|              |       | # of sampled lakes:        | 307           | 301           | 249           | 94           | 82           | 83           | 8            | 2            | 116          |
|              |       | sample years:              | 1977-2010     | 1977-2010     | 1977-2010     | 1981-2010    | 1979-2010    | 1984-2010    | 2007         | 1979-1994    | 1977-2010    |
| Wisconsin    | 6009  | # of samples:              | 45973         | 130819        | 26068         | 4599         | 174          | 4029         | 1932         | 9596         | 9417         |
|              |       | # of sampled lakes:        | 1920          | 2079          | 1024          | 1281         | 1            | 671          | 180          | 1160         | 1216         |
|              |       | sample years:              | 1933-2013     | 1948-2013     | 1933-2013     | 1974-2013    | 1976-1998    | 1977-2013    | 1986-2010    | 1933-2013    | 1965-2013    |
| <b>TOTAL</b> | 49592 | <b># of samples:</b>       | <b>154652</b> | <b>897724</b> | <b>202789</b> | <b>38764</b> | <b>15709</b> | <b>27112</b> | <b>39656</b> | <b>60954</b> | <b>65982</b> |
|              |       | <b># of sampled lakes:</b> | <b>9749</b>   | <b>12034</b>  | <b>7867</b>   | <b>5054</b>  | <b>2726</b>  | <b>4599</b>  | <b>2685</b>  | <b>5377</b>  | <b>7472</b>  |

We include the number of individual values (representing an individual sampling event); the number of unique lakes for which there is at least one data value; and, the earliest and most recent year of sampling, all recorded by state and variable from any time period. Additional variables in LAGOS-NE<sub>LIMNO</sub> v1.087.1, not included in this table, which have relatively low sample sizes include: dissolved Kjeldahl nitrogen, ammonium, nitrite, soluble reactive phosphorus, total dissolved nitrogen, total dissolved phosphorus, total organic carbon, and total organic nitrogen. n/a is not applicable.

14  
15  
16  
17  
18  
19  
20 535  
21 536  
22 537

**Table 4. The number of datasets, data values, and lakes from the different types of sampling programs in LAGOS-NE v1.087.1.**

| Program Type                          | Number of datasets | Number of lakes (≥4 ha) |                    | Total phosphorus | Secchi depth | Chl. a  | True color | Apparent color | Dissolved organic carbon | Total nitrogen | Total Kjeldahl nitrogen | Nitrate + nitrite |
|---------------------------------------|--------------------|-------------------------|--------------------|------------------|--------------|---------|------------|----------------|--------------------------|----------------|-------------------------|-------------------|
| Federal Agency                        | 3                  | 17                      | # of values:       | 419              | 527          | 324     | 229        | 173            | 215                      | 335            | 6                       | 30                |
|                                       |                    |                         | # of unique lakes: | 17               | 17           | 17      | 13         | 15             | 14                       | 16             | 1                       | 9                 |
| Federal Agency/ University            | 2                  | 2                       | # of values:       | -                | 799          | -       | -          | -              | -                        | -              | -                       | -                 |
|                                       |                    |                         | # of unique lakes: | -                | 2            | -       | -          | -              | -                        | -              | -                       | -                 |
| LTER                                  | 3                  | 9                       | # of values:       | 2,346            | 3,529        | 2,567   | -          | -              | 1,872                    | 1,612          | 507                     | 2,396             |
|                                       |                    |                         | # of unique lakes: | 9                | 9            | 5       | -          | -              | 9                        | 9              | 4                       | 9                 |
| National Survey Program               | 5                  | 2,244                   | # of values:       | 2,320            | 2,595        | 243     | 3,689      | 703            | 4,714                    | 431            | -                       | 4,204             |
|                                       |                    |                         | # of unique lakes: | 1,863            | 1,891        | 171     | 13         | 142            | 2,235                    | 398            | -                       | 1,997             |
| Non-Profit Agency                     | 4                  | 44                      | # of values:       | 1,326            | 4,798        | 2,678   | -          | -              | -                        | 214            | 9                       | 908               |
|                                       |                    |                         | # of unique lakes: | 44               | 41           | 28      | -          | -              | -                        | 39             | 1                       | 44                |
| State Agency                          | 33                 | 4,264                   | # of values:       | 34,348           | 42,888       | 29,993  | 16,240     | 5,010          | 14,528                   | 5,359          | 7,220                   | 25,684            |
|                                       |                    |                         | # of unique lakes: | 3,914            | 3,186        | 2,309   | 2,092      | 776            | 1,191                    | 634            | 1,991                   | 3,216             |
| State Agency/ Citizen Monitoring      | 11                 | 7,039                   | # of values:       | 79,390           | 645,650      | 124,766 | 18,010     | 8,630          | 3,195                    | 18,610         | 52,995                  | 27,826            |
|                                       |                    |                         | # of unique lakes: | 3,955            | 6,629        | 4,341   | 1,111      | 1,508          | 786                      | 772            | 3,476                   | 2,782             |
| State Agency/Univ/ Citizen Monitoring | 4                  | 1,835                   | # of values:       | 31,809           | 194,177      | 37,993  | 439        | 1,171          | 1,519                    | 10,844         | -                       | 2,112             |
|                                       |                    |                         | # of unique lakes: | 1,439            | 1,812        | 1,253   | 302        | 393            | 574                      | 712            | -                       | 99                |
| Tribal Agency                         | 5                  | 46                      | # of values:       | 911              | 145          | 905     | 3          | -              | 357                      | 411            | 277                     | 463               |
|                                       |                    |                         | # of unique lakes: | 33               | 3            | 32      | 3          | -              | 11                       | 18             | 5                       | 17                |
| University                            | 17                 | 535                     | # of values:       | 2,273            | 4,412        | 3,939   | 172        | 69             | 723                      | 2,275          | -                       | 2,397             |
|                                       |                    |                         | # of unique lakes: | 326              | 500          | 415     | 151        | 69             | 318                      | 396            | -                       | 171               |

53 538  
54  
55  
56  
57  
58  
59  
60  
61  
62  
63  
64  
65

1  
2  
3  
4 539  
5 540 **Figure 4. Percentage of lakes by lake area with water quality data.** Percentage of census lakes in each lake size  
6 541 bin (top panel) compared to the percentage of census lakes for which there are limnological data for Secchi (second  
7 542 panel), chlorophyll *a* (third panel), and total phosphorus (TP; bottom panel).  
8 543

9 544 Using the three most sampled variables in the dataset (Secchi depth, chlorophyll concentration  
10 545 and total phosphorus), we found that larger lakes were more likely to be sampled for water quality than  
11 546 smaller lakes (Figure 4). This result was expected given the economic and recreational interest in larger  
12 547 lakes, including easier public access. Previous research has already documented this basic pattern in 6 of  
13 548 the states included in LAGOS-NE [30]. Across all states, almost 80% of lakes > 400 ha have water  
14 549 quality data.

15 550 Lakes are also unevenly sampled through time, depending on the variable (Figure 5). Some  
16 551 programs' focus is on long-term monitoring, whereas others are short-term initiatives. Typically, long-  
17 552 term monitoring programs are localized to a few lakes, although there are exceptions (e.g., monitoring for  
18 553 acid rain in the northeastern US in the 1980s-present has resulted in good temporal and spatial coverage  
19 554 for some variables through time and space [31].  
20 555

21 556 **Figure 5. The number of years of water quality data by lake.** The number of years for which at least one sample  
22 557 is taken during the summer stratified season (15 June to 15 September) for: Secchi depth in meters, total phosphorus  
23 558 in µg/L, total nitrogen in µg/L (includes both measured and calculated values), and chlorophyll *a* in µg/L.  
24 559  
25 560

## 26 561 **6. Description of LAGOS-NE<sub>GEO</sub> v1.05 data module**

27 562 The LAGOS-NE<sub>GEO</sub> module includes information on the ecological context of the census lakes,  
28 563 their watersheds, and their regions. The information provided in the data tables for this module is  
29 564 organized into three main themes in which data are exported into individual tables: CHAG - climate,  
30 565 hydrology, atmospheric deposition of nitrogen and sulfur, and surficial geology; LULC - land use/cover,  
31 566 canopy cover, terrain metrics, and dam density; and CONN - lake, stream, and wetland abundance and  
32 567 connectivity measures (Figure 2). We also provide the GIS coverages that include some of the underlying  
33 568 data for this module, including: lake polygons and their hydrologic classifications defined in [17];  
34 569 wetland polygons and their classification; streams as a line coverage and their classification by stream  
35 570 order; the zones used for this study (state and county; hydrologic units [at the 4, 8 and 12 scales; [32]]);  
36 571 and, lake watersheds (IWS). We also include boundaries of U.S. states and Canadian provinces for  
37 572 mapping.  
38 573

### 39 574 **Data sources of the LAGOS-NE<sub>GEO</sub> module**

40 575 Detailed information on data sources are found in 'Additional File 5' in Soranno et al. [17].  
41 576 Almost all data sources for this module are from national-scale datasets and thus use standardized  
42 577 methods throughout the study extent.  
43 578

### 44 579 **Data-integration methods of the LAGOS-NE<sub>GEO</sub> module**

45 580 All methods to create this module are described in 'Additional files 5, 7, 8, 13, and 14' in  
46 581 Soranno et al. [17]. Briefly, we calculated the metrics for this module that describe the ecological context  
47 582 surrounding lakes by developing project-specific GIS tools in the ArcGIS environment, which are  
48 583 referred to as the LAGOS GIS Toolbox (and made available here: [33]). The toolbox outputs multiple  
49 584 individual data tables of calculated values organized by the above three data themes that are then  
50 585 imported into LAGOS-NE<sub>GEO</sub> for different spatial classifications, including values calculated at the level  
51 586 of the individual lake, 100-m and 500-m buffers around each lake, the lake IWS, states and counties,  
52 587 hydrologic units, and ecological drainage units (an ecoregion spatial classification). The unique identifiers  
53 588 for this data module are the zone ID's for each spatial classification for which we calculate these metrics.  
54 589 In other words, we calculate land use around a lake in each of the zones of the many spatial classifications  
55  
56  
57  
58  
59  
60  
61  
62  
63  
64  
65

1  
2  
3  
4 590 in LAGOS-NE. However, the data are exported into individual tables by spatial classification. Therefore,  
5 591 there are different numbers of rows in each table; for example, there are 51,101 rows for the land use  
6 592 metrics calculated for the 100-m lake buffer because there are 51,101 lakes that have a 100-m buffer area,  
7 593 but only 17 rows for the land use metrics calculated for the state spatial classification.  
8  
9 594

#### 10 **Quality control of the LAGOS-NE<sub>GEO</sub> module**

11 596 The full description of error analysis for this module is described in ‘Additional file 14’ in Soranno et al.  
12 597 [17]. The quality control procedures for this module included procedures to identify possible errors or  
13 598 improbable values as a result of the extensive automated GIS data processing that creates the LAGOS-  
14 599 NE<sub>GEO</sub> data tables and to correct those problems. We assumed that the original data layers had already  
15 600 gone through extensive quality control by the originators of the datasets. We defined errors and  
16 601 improbable values to be: (1) values that did not make ecological sense; (2) values that were well beyond  
17 602 what has been observed in previous studies; (3) values that are not technically feasible; or, (4) null values  
18 603 that indicate an absence of data, when in fact data exist based on the input data coverages. Note, it was  
19 604 not our intention to remove statistical outliers that may or may not be real/true values. Rather, we  
20 605 conducted procedures on each exported table that included: verifying column headers and units, mapping  
21 606 the exported data to evaluate mapping extent and boundary issues using visual inspection, mapping the  
22 607 data distributions of each value, identifying values that were missing or zero, plotting distributions of the  
23 608 data, ensuring that proportions summed to 100 where relevant, and inspecting univariate plots of metrics  
24 609 that are known to be related (e.g., % urban land use versus % impervious surface).  
25  
26 610

#### 27 **Data in the LAGOS-NE<sub>GEO</sub> module**

28 611 This module contains the largest amount of data of any of the modules. For example, Figure 6 shows the  
29 612 wide range of ecological context for the LAGOS-NE study area calculated for three different spatial  
30 613 classifications. For those variables that are measured coarsely (e.g., baseflow, runoff, atmospheric  
31 614 deposition, geology), we calculated variables for only the broader spatial classifications. For example, we  
32 615 did not calculate baseflow for spatial classifications finer than HUC12 because the underlying data for  
33 616 baseflow is estimated on a zone generally coarser than the area of a lake watershed.  
34  
35 617  
36 618  
37 619  
38 620

39 **Figure 6. Example ecological context variables by spatial classification in LAGOS-NE.** The top four panels are  
40 622 zoomed in to selected regions of Minnesota and Wisconsin so that the zone boundaries can be seen. The upper left  
41 623 panel shows stream density in each lake IWS, and the upper right panel shows the percent of connected wetlands in  
42 624 each lake IWS. The middle left panel shows the 2011 percent urban land use/cover in each hydrologic unit code 12  
43 625 (HUC12), and the middle right panel shows the 2011 percent agricultural land use/cover in each hydrologic unit  
44 626 code 12 (HUC12). The lower left panel shows the 2010 nitrogen deposition in each HUC8, and the lower right panel  
45 627 shows the average percent of streamflow that is baseflow in each HUC8.  
46 628  
47 629  
48 630  
49 631  
50 632  
51 633  
52  
53  
54  
55  
56  
57  
58  
59  
60  
61  
62  
63  
64  
65

## 7. Research to date using LAGOS-NE

Prior versions of this database have supported numerous peer-reviewed publications to date. In particular, LAGOS-NE is ideally suited for studying the local to regional controls of water quality through both space and time because of the large number of lakes with in situ water-quality measurements and its wide gradients of ecological context. The lake census dataset also makes it possible to quantify the types of biases present in the dataset to assess the potential influence of uneven sampling efforts on results across both space and time. Below, we describe the types of research questions that have been and are being addressed using LAGOS-NE, organized according to three main topics related to studying water quality across space and time in thousands of lakes. We have published 10 articles using portions of this database, and 13 articles are in review or preparation presently.

### Methods and database development for macrosystems ecology:

Several of our lines of research have required the development of novel methods and the application of existing methods in novel ways. Much of the impetus for this work on methods and database development has been driven by two needs. The first, was to further develop the database--i.e., creating derived and predicted data as a new data product that is publicly accessible (e.g., [28]). The second was to better understand the spatial and temporal distribution of data contained in LAGOS-NE and to further our understanding of important ecological attributes of lakes across multiple spatial scales. These two needs are not mutually exclusive--analyses that have helped contribute data to LAGOS-NE have also addressed important ecological questions.

Three data gaps were identified early during database development including: (1) a lack of lake depth information (lake depth drives many in-lake processes), (2) the need to develop a flexible method for creating ecological regions from multi-themed mapped data, which are often used in macroscale research to account for broad-scale patterns and processes and, (3) the need for developing ways to measure freshwater connectivity to account for the transport and processing of materials in lakes at broad scales. For the first gap, Oliver et al. [28] used a linear mixed model to predict lake depth for lakes where in situ measurements were lacking, allowing the relationship between surface area and lake depth to vary by region because of the strong regional differences in this relationship. Predictions in some regions were far better than other regions, potentially due to differences in underlying geomorphology. To address the second gap, Yuan et al. [34] developed a novel spatially constrained spectral clustering algorithm that balances geospatial homogeneity and region contiguity, to delineate ecological regions. Cheruvilil et al. [35] has since applied this clustering algorithm across the 17 state study region and tested the ability of newly developed regions to capture variation in lake nutrients and water clarity. Finally, to address the third gap, Fergus et al. [29] developed approaches for determining freshwater connectivity of lakes, streams, and wetlands across broad spatial extents. The resulting freshwater metrics and analysis provide insight into the spatial distribution of surface-water connectivity types across the LAGOS-NE study area and provide LAGOS-NE users with novel metrics of connectivity for use in future research.

A further challenge in large, integrated databases such as LAGOS-NE is the well-known problem with data derived from analytical methods related to the issue of detection limits [36]. Stow et al. (in prep) studied the in situ concentrations that were too low to be quantified by standard analytical practices — measurements that are termed left-censored or below a detection limit of an analytical method. Unfortunately, detection limits were only sometimes reported (although, we do include those data in LAGOS-NE<sub>LIMNO</sub> where available). In some cases, low values were flagged as being censored, with an explanation as to the reason for censoring the data value, but in other cases the reason for censoring was not clear. In some instances, patterns in the data suggested that ad hoc substitutions for censored observations may have occurred without clear documentation. Stow et al. (in prep) describe a statistical approach that can be used to accommodate left-censored data during macroscale statistical analyses. This work also led to refining how censored observations were reported in LAGOS-NE, which has been incorporated into all later versions of LAGOS-NE<sub>LIMNO</sub>, including v1.087.1.



1  
2  
3  
4 683 Lake water quality is affected by many ecological context features, such as lake physical  
5 684 characteristics, land cover, land use, and climate. The relationship between these features and the water-  
6 685 quality measurements is not always linear. In addition, the data tend to be noisy and often contain missing  
7 686 values, which makes it challenging to fit effective statistical models. To overcome these challenges, Yuan  
8 687 et al. [37] developed a novel algorithm for learning non-linear features to predict lake water quality. The  
9 688 algorithm also enables the missing values to be imputed in a way that preserves the relationship between  
10 689 the predictors and response variables. Furthermore, because many of the lake water-quality variables are  
11 690 strongly correlated with each other, their models are expected to be similar. This similarity information  
12 691 can thus be exploited to build better models especially for the lake water-quality variables that have very  
13 692 few observations because they are not sampled frequently. Yuan et al. (in prep) are developing a machine  
14 693 learning approach known as multi-task learning that can simultaneously build regression models of  
15 694 multiple lake water-quality variables for a large number of lakes, taking into account both the correlation  
16 695 between the variables and the spatial autocorrelation among the lakes. Because we expect many  
17 696 ecological datasets across broad geographic scales to have similar data gaps and challenges as LAGOS-  
18 697 NE, we think these methods will be extremely valuable for other researchers studying different  
19 698 macroscale questions.  
20 699

23 700 *Understanding spatial variation in lake nutrients and eutrophication at sub-continental scales:*

24 701 LAGOS-NE allows investigation of spatial variation in lake nutrients and eutrophication at  
25 702 macroscales. For example, Lapierre et al. (in prep) identify general spatial principles that constrain  
26 703 relationships between ecosystem variables with different spatial structures. In other cases, specific  
27 704 questions regarding spatial patterns have focused on identifying important landscape controls on nutrients  
28 705 and their ratios [38], potential stress induced on phytoplankton communities by high nitrogen levels  
29 706 (Filstrup et al. in prep), and spatial autocorrelation in lake-specific relationships between chlorophyll and  
30 707 nutrients and carbon [39]. In addition, LAGOS-NE contains a wealth of information on a variety of lake  
31 708 ecosystem types. Shallow lakes, in particular, are very abundant across the study area and represent  
32 709 systems that can exhibit hysteresis in response to lake eutrophication. Cheruvelil and Wagner (in prep) are  
33 710 investigating the spatial distribution and temporal dynamics of water clarity in shallow lakes of the  
34 711 LAGOS-NE study area.

35 712 An important area of research, and one that was a motivating factor for the creation of LAGOS-  
36 713 NE, is understanding the importance of cross-scale interactions (CSIs) — where ecological processes  
37 714 operating at one spatial or temporal scale interact with processes operating at another scale — in lake  
38 715 ecosystems. Because of their importance ecologically and the challenge of quantifying them over large  
39 716 spatial extents, Wagner et al. [40] evaluated the statistical power of large multi-thematic, multi-scaled  
40 717 datasets, such as LAGOS-NE, to detect CSIs. This work not only helped inform the design of large-scale  
41 718 studies aimed at detecting CSIs, but also focused attention on the importance of considering CSI effect  
42 719 sizes and their ecological relevance.. To extend this work, Fergus et al. (in prep) are investigating the  
43 720 importance of both within- and cross-scale interactions in landscape models predicting lake nutrients, and  
44 721 the role that connectivity among freshwaters plays in these interactions. Understanding and predicting  
45 722 nutrients in lakes at macroscales is important to inform estimates of lake contributions to continental and  
46 723 global nutrient cycles. To date, much of this work has been performed on a nutrient-by-nutrient basis,  
47 724 despite knowing that cycles of nitrogen and phosphorus and other key elements are best understood by  
48 725 considering multiple elements in tandem, *e.g.*, in a stoichiometric framework [41] or through analysis of  
49 726 coupled biogeochemical cycles (*e.g.*, [42, 43, 44]). Currently, efforts are underway to develop spatial joint  
50 727 nutrient distribution models to evaluate how our understanding of landscape-scale drivers of lake  
51 728 nutrients and predictive performance are improved by considering multiple nutrients simultaneously  
52 729 (multivariate models) compared to traditional univariate approaches that ignore that nutrient cycles can be  
53 730 tightly coupled in freshwaters (Wagner et al. in prep).  
54 731  
55 732  
56 733

1  
2  
3  
4 734 Understanding temporal and spatial variation in lake eutrophication at sub-continental scales:

5 735 In addition to the vast spatial data contained in LAGOS-NE, temporal data are available for many  
6 736 water-quality variables, and some of the ecological context variables (e.g., land use/cover and  
7 737 atmospheric deposition). This is important information within the context of understanding and predicting  
8 738 how lake ecosystems have and will respond to global change, such as changes in climate and land use,  
9 739 and management activities to reduce nutrient inputs to lakes. Because we do not expect responses to such  
10 740 change and actions to be the same everywhere, these questions must be addressed across both space and  
11 741 time. In particular, recent environmental changes and management efforts have been hypothesized to both  
12 742 improve and degrade water quality in lakes. However, to date, there have been no studies to examine  
13 743 these issues comprehensively across broad scales and to examine which drivers are most strongly related  
14 744 to eutrophication status in lakes. LAGOS-NE is very well suited to answer these types of questions.

15 745 For example, nearly 3,000 lakes were examined for trends in nutrients and chlorophyll from 1990  
16 746 to 2013 using LAGOS-NE [45]. Across all lakes, nitrogen has declined, and phosphorus and chlorophyll  
17 747 have not changed. Nitrogen and stoichiometric changes in lakes were related to atmospheric deposition of  
18 748 nitrogen, providing key insight into large-scale nutrient transport and policies such as the Clean Air Act.  
19 749 Using only citizen-science data in a subset of the LAGOS-NE database, Lottig et al. [46] showed results  
20 750 that suggested little evidence for major declines or improvements in water quality. In addition, Collins et  
21 751 al. (in press) are examining the relationships between a wide range of climate metrics and water quality in  
22 752 ~11,000 lakes in LAGOS-NE to determine, 1) which climate metrics are most related to water quality; 2)  
23 753 whether physical, chemical and biological aspects of lakes respond to climate in the same way; and, 3)  
24 754 how the climate-water-quality relationship varies across space and regions with different ecological  
25 755 context. However, the temporal dynamics of lake ecosystem properties can sometimes be nonlinear and  
26 756 exhibit variability across the landscape--largely because of climate and within-lake processes. Lottig et al.  
27 757 (in prep) have developed models for understanding and predicting the often complex temporal patterns  
28 758 observed in water clarity. These studies point to the importance of considering both space and time when  
29 759 trying to understand broad-scale environmental issues in surface waters.

30 760  
31  
32  
33  
34  
35 761 **8. Using LAGOS-NE for future research, management, and policy**

36 762 To facilitate potential future use of LAGOS-NE, we have thoroughly documented the database  
37 763 and its methods [17]; and, here, we share LAGOS-NE data with the broader research community. In this  
38 764 data paper, we include a wide range of research products, including: the water quality and ecological-  
39 765 context data; the GIS coverages underlying much of the analyses on freshwaters; and, an R package that  
40 766 facilitates use of LAGOS-NE [47]. This package includes functions to retrieve, store, and interact with the  
41 767 LAGOS-NE database that works across many different operating systems. The package should increase  
42 768 the ease with which users of the database are able to access the data and documentation while maintaining  
43 769 a reproducible workflow.

44 770 Key motives for constructing this database included interest in examining lake nutrients and  
45 771 productivity at multiple spatial and temporal scales, fostering broad-scale aquatic ecology and  
46 772 macrosystems research in an open-science platform, and providing new understanding and resources for  
47 773 management and policymakers. To this end, several team members have made presentations at scientific  
48 774 meetings about the structure and use of LAGOS-NE and subsets of LAGOS-NE data have been shared  
49 775 with other researchers and stakeholders and agency personnel in advance of this publication. These early  
50 776 uses of LAGOS-NE data by other researchers outside of our team include an investigation of patterns and  
51 777 causes of shifting distribution of a sentinel fish species (Rypel et al. in prep), developing models to  
52 778 simulate lake temperatures (Winslow et al. in prep) and fish species distributions, and developing a  
53 779 recruitment model for a popular game fish (Hansen et al. in prep). Results from the latter two efforts will  
54 780 inform state-level fisheries management as well as aid in prioritization of lakes for habitat conservation  
55 781 action across a tri-state region.

56 782 Much of the research that we and others are conducting with LAGOS-NE has implications for  
57 783 ecosystem management or environmental decision-making. In addition, we have collaborated with

1  
2  
3  
4 784 boundary organizations and decision-makers. For example, under development is a dashboard of the  
5 785 ecosystem services provided by lakes for use by land managers (Keeler et al. in prep). In addition, we  
6 786 have helped the state of Michigan determine lake-specific nutrient standards [48]. Our hope is that this  
7 787 database and the associated support tools and documentation serve as a powerful resource and a  
8 788 foundation for future research and decision-making by a broad community of scientists, policy makers,  
9 789 and natural-resource managers. Indeed, our success and experience with database construction and  
11 790 research has inspired us to expand the spatial extent for LAGOS-NE. We have begun to build LAGOS-  
12 791 US, which will include similar data as LAGOS-NE but will be for the continental U.S.  
13 792

## 14 793 **9. Challenges and recommendations for creating large, integrated, and** 15 **heterogeneous databases** 16 794 17 795

18 796 We found that the largest challenge when creating this database was integrating many small  
19 797 heterogeneous datasets that had few common standards. Although creating such large, integrated datasets  
20 798 using fully automated procedures may happen someday, it appears that we are nowhere near such  
21 799 automation today. Until standards in metadata documentation and robust ontologies are created and  
22 800 widely adopted when creating local or regional datasets, future efforts to integrate these into larger  
23 801 databases will have to rely on close collaborations among domain experts and ecoinformatics  
24 802 professionals, extensive manual interpretation of individual datasets, and funds sufficient to implement  
25 803 these labor-intensive approaches [16]. Nevertheless, it is worth the time and money invested in database  
27 804 integration if the resulting databases support new research, management, policy, public outreach, and  
28 805 education at all levels. We anticipate that LAGOS-NE will serve as a foundation for new data modules  
29 806 that can be used beyond the original intent of LAGOS-NE.  
30 807

### 31 808 The economic value of water quality data in an integrated database

32 809 This extensive effort was supported by a U.S. National Science Foundation grant that totaled \$2.4  
33 810 million, along with resources from other projects. Our team ranged in size from 14-20 individuals across  
34 811 the six years of the project, with many members compiling and integrating data, authoring metadata,  
35 812 creating new data products, and implementing quality control procedures, resulting in a tremendous  
36 813 number of person-hours. However, when one considers the cost of the data collection for the water quality  
37 814 data in the first place, the expense of this post-processing integration work is not as large as it sounds.  
38 815 Sprague et al. [16] suggest that a single sample (estimated for collecting nutrient or chemistry data from  
39 816 streams) ranged in cost from \$2000-\$6000 per sample. If we assume similar rates for lake sampling, but  
40 817 lower the cost as some aspects of lake sampling may be cheaper than stream sampling and multiply that  
41 818 cost (estimated as \$1,000-\$4,000 US) by the total number of records of nutrient or chemical samples in  
42 819 LAGOS-NE (n=589,909), then the combined estimate to collect the water quality data found in LAGOS-  
43 820 NE is in the range of \$0.5 – 2.4 billion US. It cost us between 0.10 - 0.40 % of the cost to sample the data  
44 821 in the first place to harmonize these half a million records, and to build an ecological-context database for  
45 822 them. This relatively small investment in preserving, documenting, and harmonizing these valuable  
46 823 datasets creates the needed infrastructure for new broad-scaled research, management, education, and  
47 824 outreach uses.  
48 825  
49 826

### 50 825 Strategies for broad-scale data-integration efforts:

51 826 One challenge is to prioritize research areas and to identify the types of datasets that may benefit  
52 827 from a similar type of integration. State, federal, tribal, and citizen-science water quality datasets were an  
53 828 excellent source of quality data for integration and conducting broad-scaled research on aquatic systems.  
54 829 There are likely other such data sources that would benefit from being integrated as we have done here.  
55 830 We recommend the following strategies to make the best use of future data integration efforts.  
56 831  
57 832  
58 833  
59  
60  
61  
62  
63  
64  
65

1  
2  
3  
4 833 (1) The database integration effort should be driven by key underlying research questions or goals, and  
5 834 grounded in a strong conceptual foundation of the important features to include. In our case, the principles  
6 835 of landscape limnology [18,19,20,12] guided the development of LAGOS-NE which helped us to  
7 836 prioritize geospatial and lake features for inclusion in the database because the addition of any data type  
8 837 or dataset cost time and money.  
9 838

10 839 (2) For databases with more than one major data type, it is very helpful to build the database in modular  
11 840 form, each with its own versioning system, specific data integration methods, and quality control  
12 841 procedures. This strategy was not a primary goal at the outset of our project, but, it emerged somewhat  
13 842 organically through the life of the project. We now recognize the many benefits that the modularity brings  
14 843 to the database, including making it much easier to be dynamic rather than static by providing a platform  
15 844 for the addition of new data, new types of data, and new modules in the future (such as for biological  
16 845 data, or data from high-frequency sensors).  
17 846

18 847 (3) The entire process should be grounded in an open-science framework. Knowing that the database,  
19 848 design, and methods were to be shared and made usable by future users influenced our decisions  
20 849 throughout the process, and made documentation a high priority throughout. Although we are making the  
21 850 full database available now, before this point, we supported open science by publishing subsets of  
22 851 LAGOS-NE data that were used in individual publications (e.g., [49, 50]).  
23 852

24 853 (4) Creation of LAGOS-NE required a strong focus on team science, and in particular the roles of and  
25 854 incentives for early-career researchers in such efforts. This type of research cannot be conducted in a  
26 855 single-investigator mode, but requires a highly collaborative and effective team-based model (e.g., [51,  
27 856 52, 53]). We explicitly considered strategies for ensuring that early-career team members get credit for  
28 857 their contributions [54], and we recommend providing team members with opportunities for leadership,  
29 858 project management, personnel management, and intellectual growth. For example, they can be part of  
30 859 major decisions and can lead smaller efforts throughout the project, as well as be given power to shape  
31 860 team policies and practices. This integration of early-career researchers into the entire research team and  
32 861 effort will give early-career professionals deep knowledge of the database, the procedures, as well as the  
33 862 skills to conduct such work in the future.  
34 863

35 864 (5) The decision how to disseminate the database documentation needs to be considered early in the  
36 865 project. For example, database documentation papers are rare, especially in ecology, but are very  
37 866 important. The documentation and procedural approaches for developing this large, integrated, and  
38 867 heterogeneous database had to be disseminated through publication prior to making the database  
39 868 available [17] and prior to publication of research results stemming from LAGOS-NE because methods  
40 869 sections in journal articles are too short to include all the necessary documentation of such methods.  
41 870 Other researchers may be discouraged by the very real consequence that publishing such products take  
42 871 time and energy investments that may slow down production of research publications. However, such a  
43 872 paper was instrumental in supporting later research articles that used LAGOS-NE. Therefore, we  
44 873 recommend that this (and other) database documentation papers become a more standard type of paper to  
45 874 describe the extensive methods involved and to supplement data papers. Such papers will facilitate the  
46 875 use, extension, and translation of these databases well into the future, as well as foster future research on  
47 876 broad-scale, complex, and societally-relevant environmental questions.  
48 877

#### 878 **Availability of supporting source code and requirements**

879 Project name: LAGOS-NE

880 Project home page: <https://github.com/cont-limno/LAGOS>

881 Operating system(s): e.g. Platform independent

882 Programming language: R

1  
2  
3  
4 883 Other requirements: R packages required (with associated versions): dplyr ( $\geq 0.7.0$ ), rappdirs ( $\geq 0.3.1$ ),  
5 884 lazyeval ( $\geq 0.2$ ), purrr ( $\geq 0.2.2.2$ ), magrittr ( $\geq 1.5$ ), sf, curl ( $\geq 2.7.0$ ), stringr ( $\geq 1.2.0$ )  
6 885 License: GPL  
7  
8

### 9 887 **Availability of supporting data**

10 888 The datasets supporting the results of this article are available in the Ecological Data Initiative repository,  
11 889 including the following specific components:

- 12 890 • LAGOS-NE-LOCUS v1.01 [55]
- 13 891 • LAGOS-NE-LIMNO v1.087.1 [56]
- 14 892 • LAGOS-NE-GEO v1.05 [57]
- 15 893 • LAGOS-NE-GIS v1.0 [58]
- 16 894 • Snapshots of the R package in the LAGOS GitHub page are also available in the GigaScience  
17 895 repository, GigaDB [59].  
18 896

## 20 897 **DECLARATIONS**

### 21 898 **List of abbreviations**

22 899 LAGOS-NE – LAke multi-scaled GeOSpatial and temporal database for the 17 Northeastern and  
23 900 Midwest U.S. states

24 901 GIS – Geographic Information System

25 902 US-EPA – United States Environmental Protection Agency

26 903 EML – Ecological Metadata Language

27 904 USGS – United States Geological Survey

28 905 NHD – National Hydrography Dataset

29 906 WBD – Watershed Boundary Dataset

30 907 IWS – Interlake Watershed

31 908 SRP – Soluble Reactive Phosphorus

32 909 TP – Total Phosphorus

33 910 TN – Total Nitrogen

34 911 DOC – Dissolved Organic Carbon

35 912 MAV – Maximum Allowable Value

36 913 TDN – Total Dissolved Nitrogen

37 914 IQR – Interquartile Range

38 915 LULC – Land Use Land Cover

39 916 CONN – Connectivity and abundance (lake, stream, and wetland)

40 917 CHAG – Climate, Hydrology, Atmospheric deposition of nitrogen and sulfur, and surficial Geology

41 918 HUC – Hydrologic Unit Code

42 919 CSI – Cross Scale Interactions  
43 920

### 47 921 **Competing interesting**

48 922 The authors declare they have no competing interests  
49 923

### 50 924 **Funding**

51 925 The creation of LAGOS-NE was supported by:

52 926 The National Science Foundation MacroSystems Biology Program in the Emerging Frontiers Division of  
53 927 the Biological Sciences Directorate (EF-1065786, EF-1638679, EF-1065649, EF-1065818, EF-1638554)  
54 928 and the USDA National Institute of Food and Agriculture, Hatch project 176820 to PAS. KEW thanks the  
55 929 STRIVE Programme (2011-W-FS-7) from the Environmental Protection Agency, Ireland. SMC thanks  
56 930 the NSF Division of Biological Infrastructure (1401954).  
57 931  
58  
59  
60  
61  
62  
63  
64  
65

1  
2  
3  
4  
5  
6  
7  
8  
9  
10  
11  
12  
13  
14  
15  
16  
17  
18  
19  
20  
21  
22  
23  
24  
25  
26  
27  
28  
29  
30  
31  
32  
33  
34  
35  
36  
37  
38  
39  
40  
41  
42  
43  
44  
45  
46  
47  
48  
49  
50  
51  
52  
53  
54  
55  
56  
57  
58  
59  
60  
61  
62  
63  
64  
65

The water quality data that are incorporated into LAGOS-NE were originally funded by the following sources:

934 State of Maine; Michigan Agricultural Experiment Station; Fisheries Division, Michigan Department of  
935 Natural Resources; New York State Division of Water Quality; Wisconsin Department of Natural  
936 Resources; University of Wisconsin-Madison; State/Trust; Michigan State University Agriculture  
937 Experimental Station Disciplinary Research Grant Program; US EPA; US EPA Section 106/319 Grants;  
938 Tribal General Fund; U.S. Army Corps of Engineers Federal Lakes Operation & Maintenance Funds;  
939 Aquatic Plant Management Society; Aquatic Ecosystem Restoration Foundation; Michigan State  
940 University; Michigan State University Department of Fisheries and Wildlife; EPA Star Fellowship to  
941 K.S.C. (U-915342-01-0); Andrew W. Mellon Foundation; Federal Aid in Sport Fish Restoration Program  
942 (Grant F-69-P, Fish Management in Ohio) administered jointly by the U.S. Fish and Wildlife Service and  
943 the Ohio Department of Natural Resources, Division of Wildlife; Iowa Department of Natural Resources  
944 (Contract #ESD04HALFasch110155); Minnesota Pollution Control Agency; NSF-Division of  
945 Environmental Biology; Ohio DNR Division of Wildlife; University of Rhode Island Watershed Watch;  
946 NSF Kellogg Biological Station Long Term Ecological Research (LTER) Program, DEB 1027253; NSF  
947 North Temperate Lakes LTER Program, DEB 1440297; Lac du Flambeau Band and Bureau of Indian  
948 Affairs; Indiana Department of Environmental Management; Missouri Department of Natural Resources;  
949 Clean Water Act Section 16; Michigan Department of Environmental Quality; Massachusetts Water  
950 Supply Protection Trust; US EPA Clean Air Markets Division (LTM Network); US EPA Office of  
951 Research and Development; New York City Department of Environmental Protection (NYSDEP); City of  
952 New York; USGS Water Availability and Use Science Program (WAUSP); U.S. Geological Survey; New  
953 York State Energy Research and Development Authority; National Institute of Food and Agriculture,  
954 U.S. Department of Agriculture, Hatch Grant 1003732; the New York State Department of Environmental  
955 Conservation; Lake Sunapee Protective Association; National Oceanic and Atmospheric Administration;  
956 Gull Lake Quality Organization; Clean Michigan Initiative; NSF grant DEB-1455461.

**Authors' contributions**

960 Data for the database were contributed by: LCB, MB, KEB, MGB, MTB, SRC, JWC, KSC, MC, JDC,  
961 JAD, JD, CTF, CSF, MJG, LTG, JDF, SKH, PCH, EH, CH, JRJ, KJH, LLJ, WWJ, JRJ, CMK, SAK, BL,  
962 JAL, YL, NRL, JAL, LJM, WHM, KEBM, BPN, SJN, MLP, DCP, AIP, DMP, POR, DOR, KMR, LGR,  
963 OS, NJS, PAS, NRS, EHS, JLS, JMT, TPT, MV, GW, KCW, KEW, JDW, and MKW. The idea to create  
964 the database was conceived by PAS and KSC. PAS coordinated the different activities across team-  
965 members to build LAGOS-NE. The database was designed by EGB, PNT, CG, and PAS; and, created and  
966 managed by EGB. The following authored metadata for the individual water quality data sets using  
967 information provided by the data providers: MTB, CKB, KSC, SMC, CEF, CTF, ENH, NRL, SKO, NKS,  
968 PAS, EHS, and KEW. CEF prepared the integrated LAGOS-NE metadata, and developed the protocols  
969 for authoring the EML metadata; and, CEF and CKB created EML metadata for the 87 water quality data  
970 sets. SKO wrote the final variables definitions for the integrated metadata. CG helped to prepare the  
971 needed metadata and documentation for loading the data in the data repository. Code for importing the  
972 datasets into the database was written by EGB, STC, NRL, and SY. NJS and SBS performed geospatial  
973 analyses and created the LAGOS-GIS Toolbox. The conceptual foundation for measuring freshwater  
974 connectivity was led by CEF. SBS developed the methods to delineate lake watersheds. The quality  
975 control methods development and analysis on LAGOS-NE<sub>LIMNO</sub> were conducted by NRL; the quality  
976 control of LAGOS-NE<sub>GIS</sub> was led by CES and SMC, and conducted by CES, SMC, CEF, NKS, and  
977 KEW. The quality control of LAGOS-NE<sub>LOCUS</sub> was conducted by EGB. Many authors who were part of  
978 the database integration team wrote the technical documentation; JFL served as editor of these technical  
979 documents. Tables and figures were prepared by SMC, KBSK, JFL, NRL, ACP, NKS and PAS and  
980 edited by many of the contributing authors. SKO and JJS wrote the LAGOS-NE R package. NJS prepared  
981 the GIS data and its corresponding metadata. PAS coordinated the writing of the manuscript, and major

1  
2  
3  
4  
5  
6  
7  
8  
9  
10  
11  
12  
13  
14  
15  
16  
17  
18  
19  
20  
21  
22  
23  
24  
25  
26  
27  
28  
29  
30  
31  
32  
33  
34  
35  
36  
37  
38  
39  
40  
41  
42  
43  
44  
45  
46  
47  
48  
49  
50  
51  
52  
53  
54  
55  
56  
57  
58  
59  
60  
61  
62  
63  
64  
65

982 parts of the manuscript were written by: PAS, KSC, SMC, JFL, NRL, SKO, JJS, EHS, PNT, TW, and  
983 SY. After the lead author, authors are listed alphabetically.

984  
985 **Competing Interests**

986 The authors declare that they have no competing interests

987  
988 **Acknowledgments**

989 We thank the contributions over the past several decades of many hundreds to thousands of governmental,  
990 tribal and citizen scientists whose efforts from lake sampling to water quality analysis to dataset  
991 compilation enabled LAGOS-NE to become a reality and a resource for the future. Specifically, we  
992 dedicate this paper to the memory of Jody Connor, whose three decades of innovative and science-driven  
993 lake management while working for the New Hampshire Department of Environmental Services  
994 generated meaningful contributions to the protection and restoration of lake quality and to lasting data  
995 legacies such as volunteer monitoring in the state. This is Great Lakes Environmental Research  
996 Laboratory contribution number 1863. Any use of trade, firm, or product names is for descriptive  
997 purposes only and does not imply endorsement by the US Government.

1  
2  
3  
4 1002  
5 1003  
6 1004  
7 1005  
8 1006  
9 1007  
10 1008  
11 1009  
12 1010  
13 1011  
14 1012  
15 1013  
16 1014  
17 1015  
18 1016  
19 1017  
20 1018  
21 1019  
22 1020  
23 1021  
24 1022  
25 1023  
26 1024  
27 1025  
28 1026  
29 1027  
30 1028  
31 1029  
32 1030  
33 1031  
34 1032  
35 1033  
36 1034  
37 1035  
38 1036  
39 1037  
40 1038  
41 1039  
42 1040  
43 1041  
44 1042  
45 1043  
46 1044  
47 1045  
48 1046  
49 1047  
50  
51  
52  
53  
54  
55  
56  
57  
58  
59  
60  
61  
62  
63  
64  
65

**References**

1. Carpenter SR, Caraco NR, Correll DL, Howarth RW, Sharpley AN, Smith VH. Nonpoint pollution of surface waters with phosphorus and nitrogen. *Ecological Applications*. 1998; 8:559-568.
2. Jaworski NA, Howarth RW, Hetling LJ. Atmospheric Deposition of Nitrogen Oxides onto the Landscape Contributes to Coastal Eutrophication in the Northeast United States. *Environmental Science and Technology* 1997; 31:1995–2004.
3. Bennett EM, Carpenter SR, Caraco NF. Human Impact on Erodible Phosphorus and Eutrophication: A Global Perspective. *BioScience*. 2001; 51:227-234.
4. Schindler DW. Recent advances in the understanding and management of eutrophication. *Limnology and Oceanography*. 2006; 51: 356–363.
5. Taranu ZE and Gregory-Eaves I. Quantifying relationships among phosphorus, agriculture, and lake depth at an inter-regional scale. *Ecosystems*. 2008; 11: 715-725.
6. Filstrup CT, Wagner T, Soranno PA, Stanley EH, Stow CA, Webster KE, Downing JA. Regional variability among nonlinear chlorophyll-phosphorus relationships in lakes. *Limnology and Oceanography*. 2014; 59: 1691-1703. doi: 10.4319/lo.2014.59.5.1691.
7. McCrackin ML, Jones HP, Jones PC, Moreno-Mateos D. Recovery of lakes and coastal marine ecosystems from eutrophication: A global meta-analysis. *Limnology and Oceanography*. 2016; 62:507-518. doi: 10.1002/lno.10441.
8. Paerl HW, Otten TG, Joyner AR. Moving towards adaptive management of cyanotoxin-impaired water bodies. *Microbial Biotechnology*. 2016; 9:641-651. doi: 10.1111/1751-7915.12383.
9. Schindler DW, Carpenter SR, Chapra SC, Hecky RE, Orihel, DM. Reducing Phosphorus to Curb Lake Eutrophication is a Success. *Environmental Science & Technology*. 2016; 50:8923-8929. doi: 10.1021/acs.est.6b02204.
10. Fergus CE, Soranno PA, Cheruvilil KS, Bremigan MT. Multiscale landscape and wetland drivers of lake total phosphorus and water color. *Limnology and Oceanography*. 2011; 56:2127-2146. doi: 10.4319/lo.2011.56.6.2127.
11. Soranno PA, Cheruvilil KS, Bissell EG, Bremigan MT, Downing JA, Fergus CE, Filstrup CT, Henry EN, Lottig NR, Stanley EH, Stow CA, Tan P-N, Wagner T, Webster KE. Cross-scale interactions: quantifying multi-scaled cause–effect relationships in macrosystems. *Frontiers in Ecology and the Environment*. 2014; 12:65–73.
12. Read EK, Patil VP, Oliver SK, Hetherington AL, Brenttrup JA, Zwart JA, Winters KM, Corman JR, Nodine ER, Woolway RL, Dugan HA, Jaimes A, Santoso AB, Hong GS, Winslow LA, Hanson PC, Weathers KC. The importance of lake-specific characteristics for water quality across the continental United States. *Ecological Applications*. 2015; 35:943-955. doi: 10.1890/14-0935.1.
13. Smith VH, Dodds WK, Havens KE, Engstrom DR, Paerl HW, Moss B, Likens GE. Comment: Cultural eutrophication of natural lakes in the United States is real and widespread. *Limnology and Oceanography*. 2014; 59: 2217-2225.
14. McDonald CP, Lottig NR, Stoddard, JL, Herlihy AT, Lehmann S, Paulsen SG, Peck DV, Pollard AI, Stevenson RJ. Comment on Bachmann et al. (2013): A non-representative sample cannot describe the extent of cultural eutrophication of natural lakes in the United States. *Limnology and Oceanography*. 2014; 59: 2226-2230.



1  
2  
3  
4  
5  
6  
7  
8  
9  
10  
11  
12  
13  
14  
15  
16  
17  
18  
19  
20  
21  
22  
23  
24  
25  
26  
27  
28  
29  
30  
31  
32  
33  
34  
35  
36  
37  
38  
39  
40  
41  
42  
43  
44  
45  
46  
47  
48  
49  
50  
51  
52  
53  
54  
55  
56  
57  
58  
59  
60  
61  
62  
63  
64  
65

15. Stoddard JL, Sickle JV, Herlihy AT, Brahney J, Paulsen S, Peck DV, Mitchell R, Pollard AI. Continental-Scale Increase in Lake and Stream Phosphorus: Are Oligotrophic Systems Disappearing in the United States? *Environmental Science and Technology*. 2016; 50(7):3409-3415. doi: 10.1021/acs.est.5b05950.

16. Sprague LA, Oelsner GP, Argue DM. Challenges with secondary use of multi-source water-quality data in the United States. *Water Research*. 2017; 100: 252-261.

17. Soranno PA, Bissell EG, Cheruvilil KS, Christel ST, Collins SM, Fergus CE, Filstrup CT, Lapierree JF, Lottig NR, Oliver SK, Scott CE, Smith NJ, Stopyak S, Yuan S, Bremigan MT, Downing JA, Gries C, Henry EN, Skaff NK, Stanley EH, Stow CA, Tan PN, Wagner T, Webster KE. Building a multi-scaled geospatial temporal ecology database from disparate data sources: fostering open science and data reuse. *GigaScience*. 2015; 4:28. doi: 10.1186/s13742-015-0067-4.

18. Magnuson JJ, Kratz, TK. Lakes in the landscape: approaches to regional limnology. *International Association of Theoretical and Applied Limnology*. 2000; 27: 74-87.

19. Wiens JA. Riverine landscapes: taking landscape ecology into the water. *Freshwater Biology*. 2002; 47L501-515. doi: 10.1046/j.1365-2427.2002.00887.x.

20. Soranno PA, Cheruvilil KS, Webster KE, Bremigan MT, Wagner T, Stow CA. Using landscape limnology to classify freshwater ecosystems for multi-ecosystem management and conservation. *BioScience*. 2010; 60:440–454.

21. United States Geological Survey National Hydrography Dataset. Version 9.3. <http://nhd.usgs.gov>. Accessed 4 June 2015.

22. Zhang T, Soranno PA, Cheruvilil KS, Kramer DB, Bremigan MT, Ligmann-Zielinska A. Evaluating the effects of upstream lakes and wetlands on lake phosphorus concentrations using a spatially-explicit model. *Landscape Ecology*. 2012, 27:1015-1030; doi: 10.1007/s10980-012-9762-z.

23. United States Geological Survey Watershed Boundary Dataset. <https://nhd.usgs.gov/wbd.html>. Downloaded in 2013.

24. National Elevation Dataset. <http://ned.usgs.gov/>. Accessed 11 March 2013.

25. US Environmental Protection Agency: National lakes assessment fact sheet. 2010. [http://water.epa.gov/type/lakes/upload/nla\\_survey\\_fact\\_sheet.pdf](http://water.epa.gov/type/lakes/upload/nla_survey_fact_sheet.pdf). Accessed 4 June 2015.

26. US Environmental Protection Agency: National lakes assessment 2012: a fact sheet for communities. 2012. <http://water.epa.gov/type/lakes/assessmonitor/lakessurvey/upload/NLA-2012-Fact-Sheet-for-Communities.pdf>. Accessed 4 June 2015.

27. Environmental Protection Agency: National Lake Survey of 2012. 2012. <https://www.epa.gov/national-aquatic-resource-surveys/nla>. Accessed 4 June 2015.

28. Oliver SK, Soranno PA, Fergus CE, Wagner T, Winslow LA, Scott CE, Webster KE, Downing JA, Stanley EH. Prediction of lake depth across a 17-state region in the United States. *Inland Waters*, 2016 6:314-324; doi: 10.5268/IW-6.3957.

29. Fergus CE, Lapierre JF, Oliver S, Skaff N, Cheruvilil K, Soranno, P, Webster K, Scott C. The freshwater landscape: Lake, wetland, and stream abundance and connectivity at macroscales. *Ecosphere*. 2017; 8:e01911. doi: 10.1002/ecs2.1911

30. Wagner T, Soranno PA, Cheruvilil KS, Renwick WH, Webster KE, Vaux P, Abbitt RJF. Quantifying sample biases of inland lake sampling programs in relation to lake surface area and land use/cover. *Environmental Monitoring and Assessment*. 2007; 141:131-147. doi:10.1007/s10661-007-9883-z.

1  
2  
3  
4  
5  
6  
7  
8  
9  
10  
11  
12  
13  
14  
15  
16  
17  
18  
19  
20  
21  
22  
23  
24  
25  
26  
27  
28  
29  
30  
31  
32  
33  
34  
35  
36  
37  
38  
39  
40  
41  
42  
43  
44  
45  
46  
47  
48  
49  
50  
51  
52  
53  
54  
55  
56  
57  
58  
59  
60  
61  
62  
63  
64  
65

31. Strock KE, Saros JE, Nelson SJ, Birkel SD, Kahl JS, McDowell WH. Extreme weather years drive episodic changes in lake chemistry: Implications for recovery from sulfate deposition and long-term trends in dissolved organic carbon. *Biogeochemistry*. 2016; 127:353–365.

32. Seaber PR, Kapinos FP, Knapp GL. Hydrologic unit maps: U.S. Geological Survey water-supply paper 2294. U.S.G.S. 1987. <http://water.usgs.gov/GIS/huc.html>.

33. Smith NJ, Soranno PA, Stopyak S. LAGOS-NE GIS Toolbox. GitHub repository. 2014. [https://soranno.github.io/LAGOS\\_GIS\\_Toolbox/](https://soranno.github.io/LAGOS_GIS_Toolbox/).

34. Yuan S, Tan PN, Cheruvilil KS, Collins SM, Soranno PA. Constrained Spectral Clustering for Regionalization: Exploring the Trade-off between Spatial Contiguity and Landscape Homogeneity. *Data Science and Advanced Analytics*. 2015. doi:10.1109/DSAA.2015.7344878.

35. Cheruvilil KS, Yuan S, Webster KE, Tan PN, Lapierre JF, Collins SM, Fergus CE, Scott C, Henry E, Soranno PA, Filstrup CT, Wagner T. Creating multi-themed ecological regions for macroscale ecology: Testing a flexible, repeatable and accessible clustering method. *Ecology and Evolution*. 2017. 7: 3046–3058. doi: 10.1002/ece3.2884

36. Helsel DR. *Statistics for censored environmental data using Minitab and R*, 2nd edition. John Wiley and Sons, New York. 2012. <http://www.wiley.com/WileyCDA/WileyTitle/productCd-0470479884.html>.

37. Yuan S, Tan PN, Cheruvilil KC, Fergus CE, Skaff NK, Soranno PA. Hash-Based Feature Learning for Incomplete Continuous-Valued Data. *Proceedings of the 2017 SIAM International Conference on Data Mining*. Houston, Texas. April 27-29, 2017.

38. Collins SM, Oliver SK, Lapierre JF, Stanley EH, Jones JR, Wagner T, Soranno PA. Lake nutrient stoichiometry is less predictable than nutrient concentrations at regional and sub-continental scales. *Ecological Applications*. 2017; 27:1529-1540. doi: 10.1002/eap.1545

39. Fergus CE, Finley AO, Soranno PA, Wagner T. Spatial variation in nutrient and water color effects on lake chlorophyll at macroscales. *PLoS ONE*. 2016; 11(10). doi: 10.1371/journal.pone.0164592

40. Wagner T, Fergus EC, Stow CA, Cheruvilil KS, Soranno PA. The statistical power to detect cross-scale interactions at macroscales. *Ecosphere*. 2016; 7:e01417. doi: 10.1002/ecs2.1417.

41. Sterner RW, Elser JJ. *The Biology of Elements from Molecules to the Biosphere*. Princeton University Press: Princeton and Oxford; 2002.

42. Rastetter, EB. Modeling coupled biogeochemical cycles. *Frontiers in Ecology and the Environment*. 2001; 9: 68-73.

43. Finzi AC, Austin AT, Cleland EE, Frey SD, Houlton BZ, Wallenstein MD. Responses and feedbacks of coupled biogeochemical cycles to climate change: examples from terrestrial ecosystems. *Frontiers in Ecology and the Environment*. 2011; 9:61-67.

44. Finlay JC, Small GE, Sterner RW. Human influences on nitrogen removal in lakes. *Science*. 2013; 342:247-250.

45. Oliver SK, Collins SM, Soranno PA, Wagner T, Stanley EH, Jones JR, Stow CA, Lottig NR. Unexpected stasis in a changing world: Lake nutrient and chlorophyll trends since 1990. *Global Change Biology*. 2017. doi: 10.1111/gcb.13810

1  
2  
3  
4  
5  
6  
7  
8  
9  
10  
11  
12  
13  
14  
15  
16  
17  
18  
19  
20  
21  
22  
23  
24  
25  
26  
27  
28  
29  
30  
31  
32  
33  
34  
35  
36  
37  
38  
39  
40  
41  
42  
43  
44  
45  
46  
47  
48  
49  
50  
51  
52  
53  
54  
55  
56  
57  
58  
59  
60  
61  
62  
63  
64  
65

46. Lottig NR, Wagner T, Henry EN, Cheruvilil KS, Webster KE, Downing JA, Stow CA. Long-Term Citizen-Collected Data Reveal Geographical Patterns and Temporal Trends in Lake Water Clarity. PLoS ONE. 2014; doi: 10.1371/journal.pone.0095769.

47. Stachelek J., Oliver SK. 2017. LAGOS: R interface to the LAke multi-scaled GeOSpatial & temporal database. R package version 1.087.1. <https://github.com/cont-limno/LAGOS>

48. Cheruvilil KS, Soranno P. Developing nutrient criteria in Michigan lakes: Revision, update, and validation of the lake-specific model for establishing expected nutrient conditions in Michigan lakes. Report to the Michigan Department of Environmental Quality. FY2012 205(j). 2015.

49. Oliver SK, Soranno PA, Fergus CE, Wagner T, Winslow LA, Scott CE, Webster KE, Downing JA, Stanley EH. LAGOS – Predicted and observed maximum depth values for lakes in a 17-state region of the U.S. Long Term Ecological Research Network. 2015; doi:10.6073/pasta/f00a245fd9461529b8cd9d992d7e3a2f.

50. Fergus CE, Finley AO, Soranno PA, Wagner T. Spatial variation in nutrient and water color effects on lake chlorophyll at macroscales. Long-Term Ecological Research Network Data Portal. 2016; doi: [10.6073/pasta/0ebd2e4c0705706b77b359955bff44e1](https://doi.org/10.6073/pasta/0ebd2e4c0705706b77b359955bff44e1).

51. Cheruvilil KS, Soranno PA, Weathers KC, Hanson PC, Goring SJ, Filstrup CT, Read EK. Creating and maintaining high-performing collaborative research teams: the importance of diversity and interpersonal skills. *Frontiers in Ecology and the Environment*. 2014; 12:31–38.

52. Weathers KC, Hanson PC, Arzberger P, Brentrup J, Brookes JD, Carey CC, Gaiser E, Hamilton DP, Hong GS, Ibelings B, Istvánovics V, Jennings E, Kim B, Kratz T, Lin FP, Muraoka K, O'Reilly C, Piccolo C, Ryder E, Zhu G. The Global Lake Ecological Observatory Network (GLEON): The Evolution of grassroots network science. *Bulletin of Limnology and Oceanography*. 2013; 22:71-73.

53. Hanson PC, Weathers KC, Kratz TK. Networked lake Science: how the Global Lake Ecological Observatory (GLEON) Works to understand, predict, and communicate lake ecosystem response to global change. *Inland Waters*. 2016; doi: 10.5268/IW-6.4.904.

54. Goring S, Weathers KC, Dodds WK, Soranno PA, Sweet LC, Cheruvilil KS, Kominoski JS, Rüegg J, Thorn AM, Utz RM. Improving the culture of interdisciplinary collaboration in ecology by expanding measures of success. *Frontiers in Ecology and the Environment*. 2014; 14: 39-47.

55. Soranno P., K. Cheruvilil. 2017. LAGOS-NE-LOCUS v1.01: A module for LAGOS-NE, a multi-scaled geospatial and temporal database of lake ecological context and water quality for thousands of U.S. Lakes: 1925-2013. Environmental Data Initiative. <http://dx.doi.org/10.6073/pasta/940b25d022c695b440e1bdbc49fbb77b>. Dataset accessed 9/14/2017.

56. Soranno P., K. Cheruvilil. 2017. LAGOS-NE-LIMNO v1.087.1: A module for LAGOS-NE, a multi-scaled geospatial and temporal database of lake ecological context and water quality for thousands of U.S. Lakes: 1925-2013. Environmental Data Initiative. <http://dx.doi.org/10.6073/pasta/b1b93ccf3354a7471b93eccc484d506>. Dataset accessed 9/14/2017.

57. Soranno P., K. Cheruvilil. 2017. LAGOS-NE-GEO v1.05: A module for LAGOS-NE, a multi-scaled geospatial and temporal database of lake ecological context and water quality for thousands of U.S. Lakes: 1925-2013. Environmental Data Initiative.

1  
2  
3  
4  
5  
6  
7  
8  
9  
10  
11  
12  
13  
14  
15  
16  
17  
18  
19  
20  
21  
22  
23  
24  
25  
26  
27  
28  
29  
30  
31  
32  
33  
34  
35  
36  
37  
38  
39  
40  
41  
42  
43  
44  
45  
46  
47  
48  
49  
50  
51  
52  
53  
54  
55  
56  
57  
58  
59  
60  
61  
62  
63  
64  
65

<http://dx.doi.org/10.6073/pasta/b88943d10c6c5c480d5230c8890b74a8>. Dataset accessed 9/14/2017.

58. Soranno P., K. Cheruvilil. 2017. LAGOS-NE-GIS v1.0: A module for LAGOS-NE, a multi-scaled geospatial and temporal database of lake ecological context and water quality for thousands of U.S. Lakes: 2013-1925. Environmental Data Initiative. <http://dx.doi.org/10.6073/pasta/fb4f5687339bec467ce0ed1ea0b5f0ca>. Dataset accessed 9/14/2017.

59. Bacon LC, Beauchene M, Bednar KE et al.: Supporting data for "LAGOS-NE: A multi-scaled geospatial and temporal database of lake ecological context and water quality for thousands of U.S. lakes" GigaScience Database. 2017. <http://dx.doi.org/10.5524/100350>

**Figure 1. Map of the study extent of LAGOS-NE.** Map includes 17 states in the upper midwest and northeastern U.S. outlined in white and 51,101 lakes  $\geq 4$  ha shown as blue polygons. Some lakes extend beyond state borders and are included in the database if it was possible to delineate their watersheds. Watershed boundaries rather than state boundaries were used for all analyses of lakes, streams and wetlands. The map is modified from [17].

**Figure 2. LAGOS-NE data modules and version numbers.** The data modules and versions that are included in LAGOS-NE and are available with this paper include: LAGOS-NE<sub>GEO</sub> v.1.05, LAGOS-NE<sub>LOCUS</sub> v.1.01 (note, that in Soranno et al. [17], this module was called LAGOS-lakes), and LAGOS-NE<sub>LIMNO</sub> v.1.087.1. We include descriptions of the type of data that are included in each module; with the major categories of variables the same as those describing the data tables in Additional File 1. The black connectors among the modules show that the modules are connected to each other through common unique identifiers through the LAGOS-NE<sub>LOCUS</sub> module (through the unique lake ID). P is phosphorus, N is nitrogen, C is carbon, S is sulfur, atm is atmospheric, NHD is the National Hydrography Dataset, IWS is the interlake watershed, WBD is the Watershed Boundary Dataset, EDU is Ecological Drainage Unit. Figure is modified from Figure 1 in Soranno et al. [17].

**Figure 3. Examples lake watersheds (IWS) in LAGOS-NE.** The watersheds are coded by hydrologic class to which its lake belongs. Data are from the LAGOS-NE<sub>GEO</sub> v.1.01 data module and the GIS data coverages.

**Figure 4. Percentage of lakes by lake area with water quality data.** Percentage of census lakes in each lake size bin (top panel) compared to the percentage of census lakes for which there are limnological data for Secchi (second panel), chlorophyll *a* (third panel), and total phosphorus (TP; bottom panel).

**Figure 5. The number of years of water quality data by lake.** The number of years for which at least one sample is taken during the summer stratified season (15 June to 15 September) for: Secchi depth in meters, total phosphorus in ug/L, total nitrogen in ug/L (includes both measured and calculated values), and chlorophyll *a* in ug/L.

**Figure 6. Example ecological context variables by spatial classification in LAGOS-NE.** The top four panels are zoomed in to selected regions of Minnesota and Wisconsin so that the zone boundaries can be seen. The upper left panel shows stream density in each lake IWS, and the upper right panel shows the percent of connected wetlands in each lake IWS. The middle left panel shows the 2011 percent urban land use/cover in each hydrologic unit code 12 (HUC12), and the middle right panel shows the 2011 percent agricultural land use/cover in each hydrologic unit code 12 (HUC12). The lower left panel shows the 2010 nitrogen deposition in each HUC8, and the lower right panel shows the average percent of streamflow that is baseflow in each HUC8.

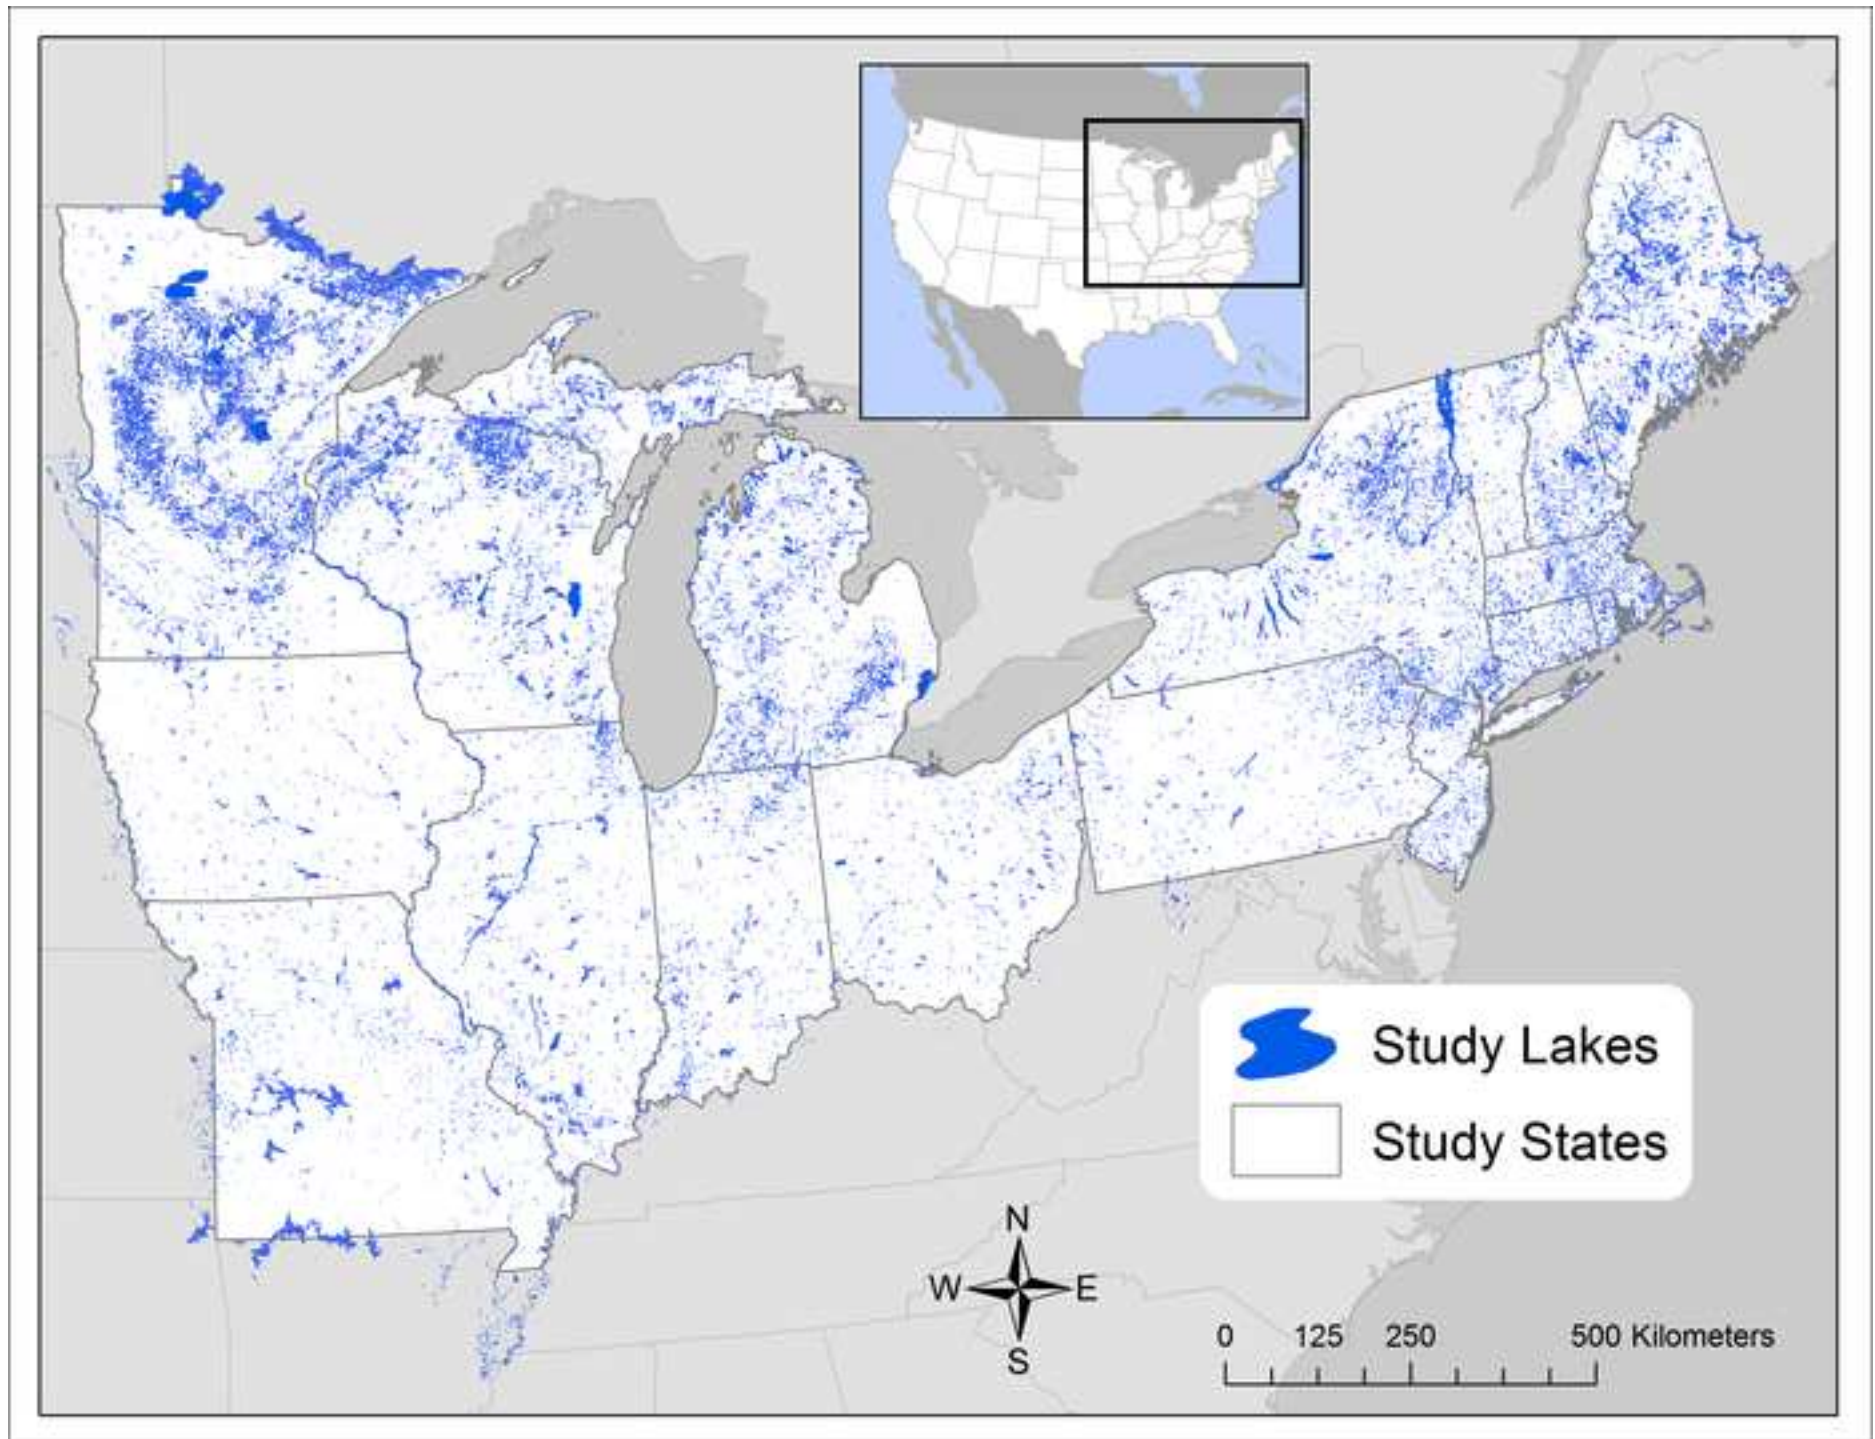

## LAGOS-NE Modules

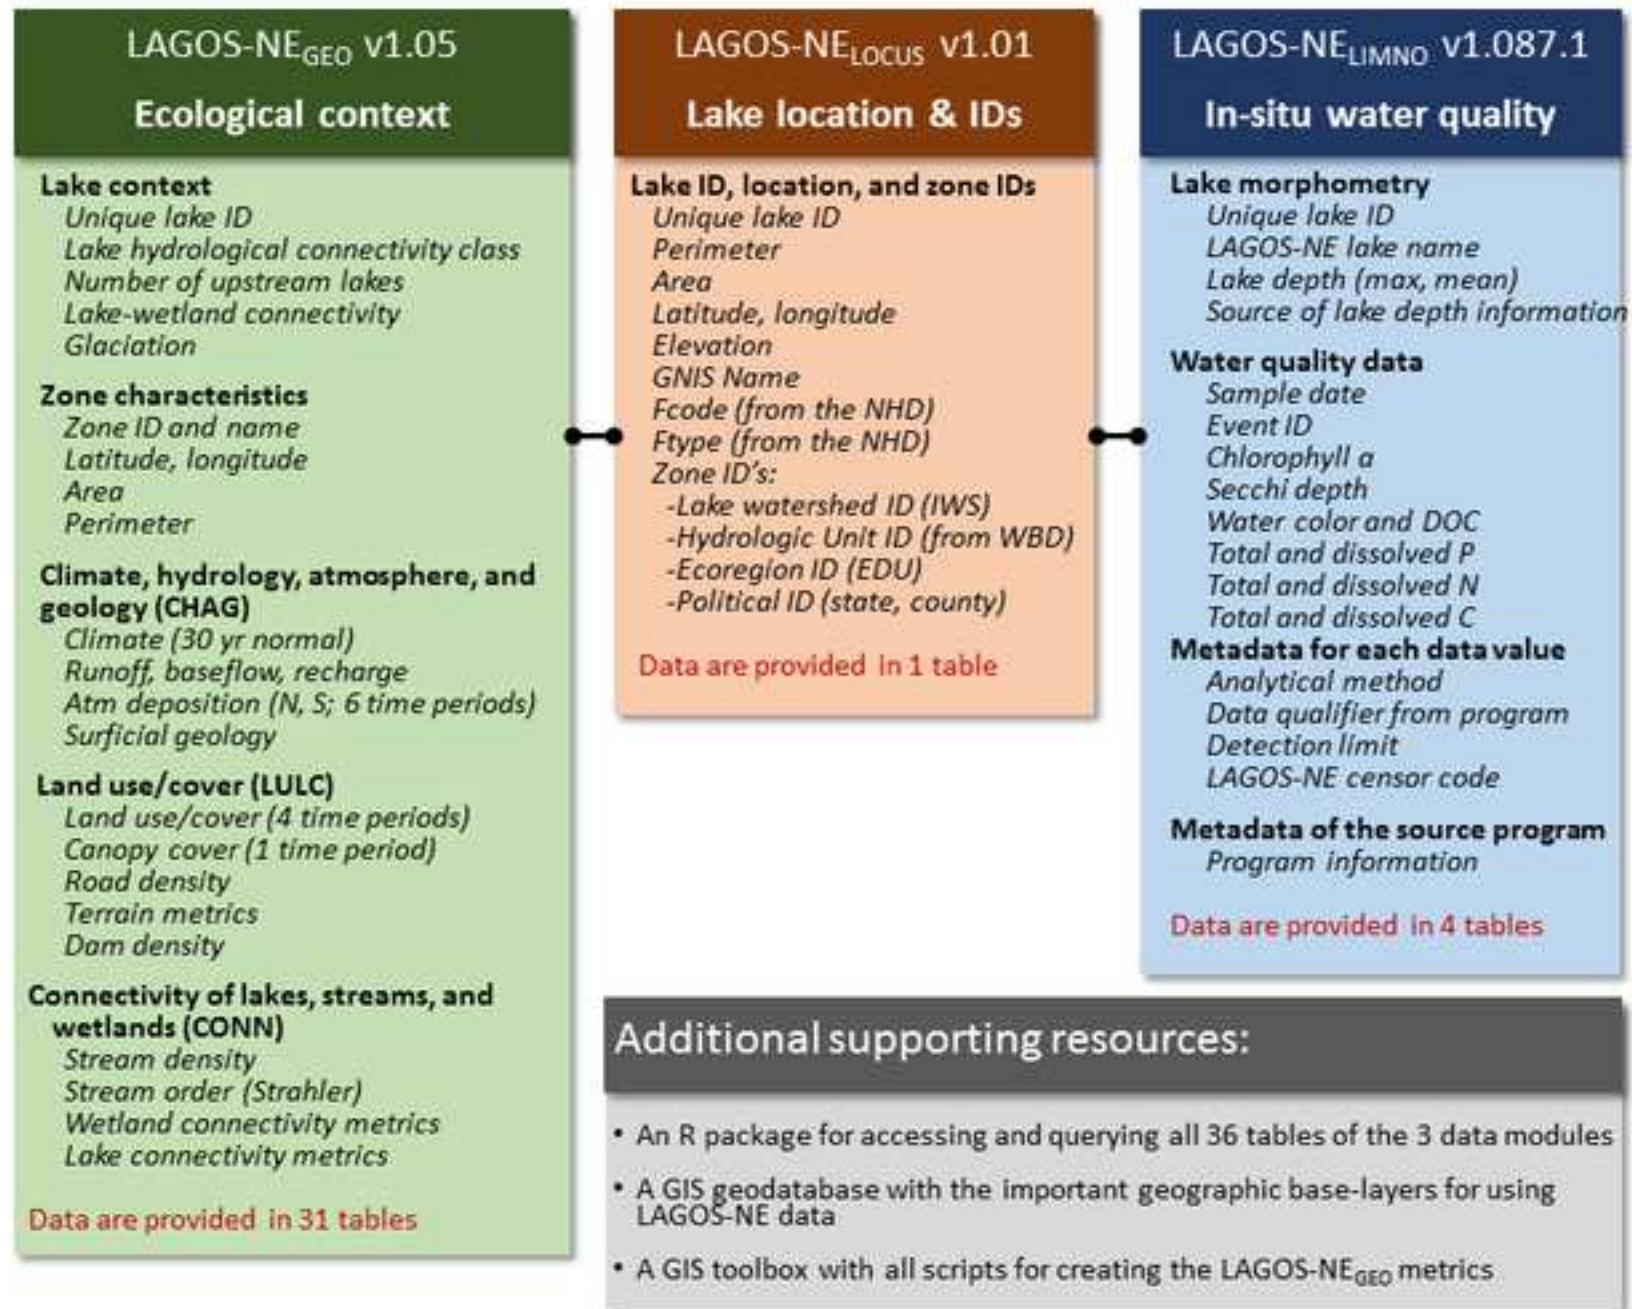

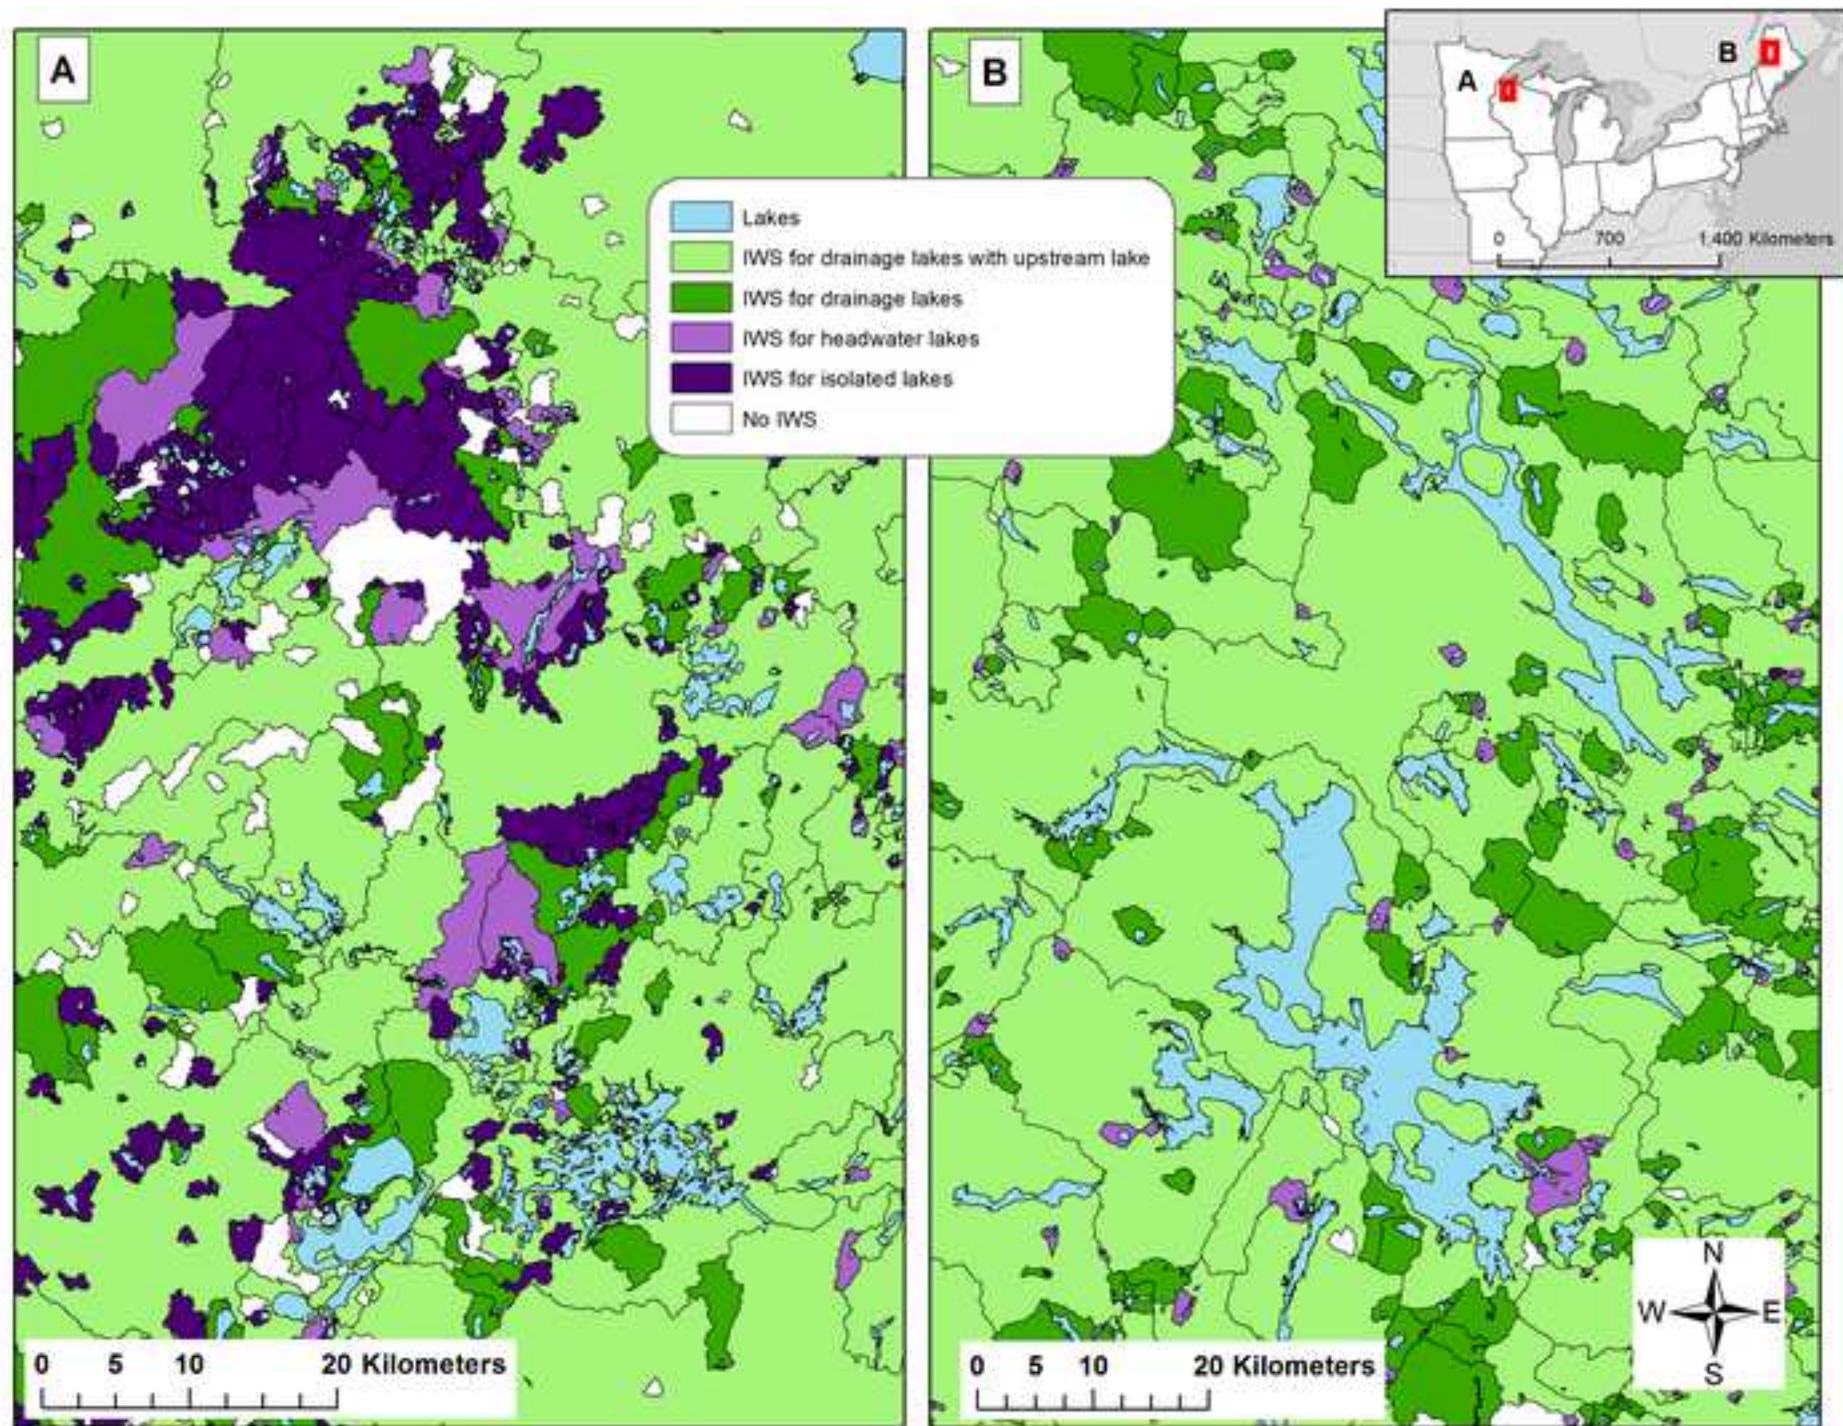

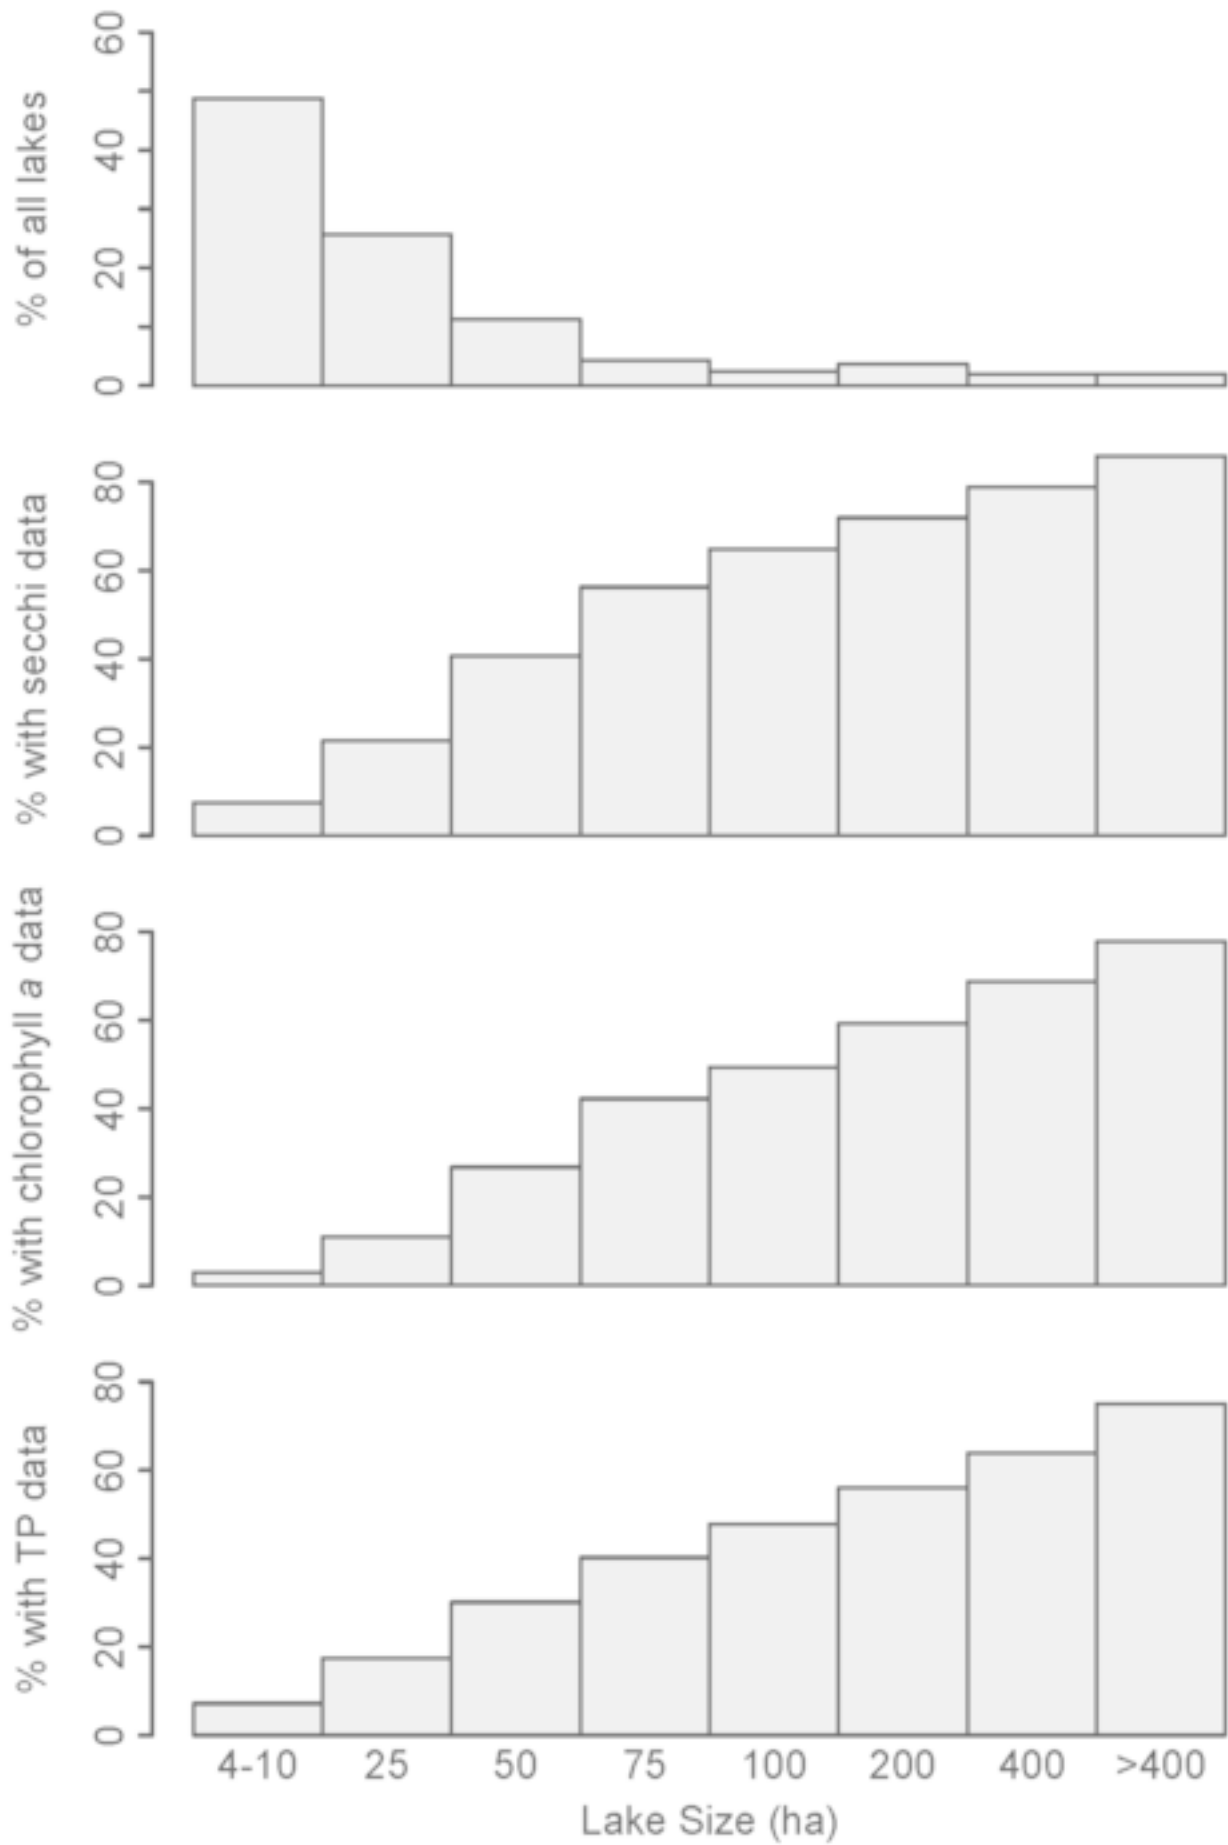



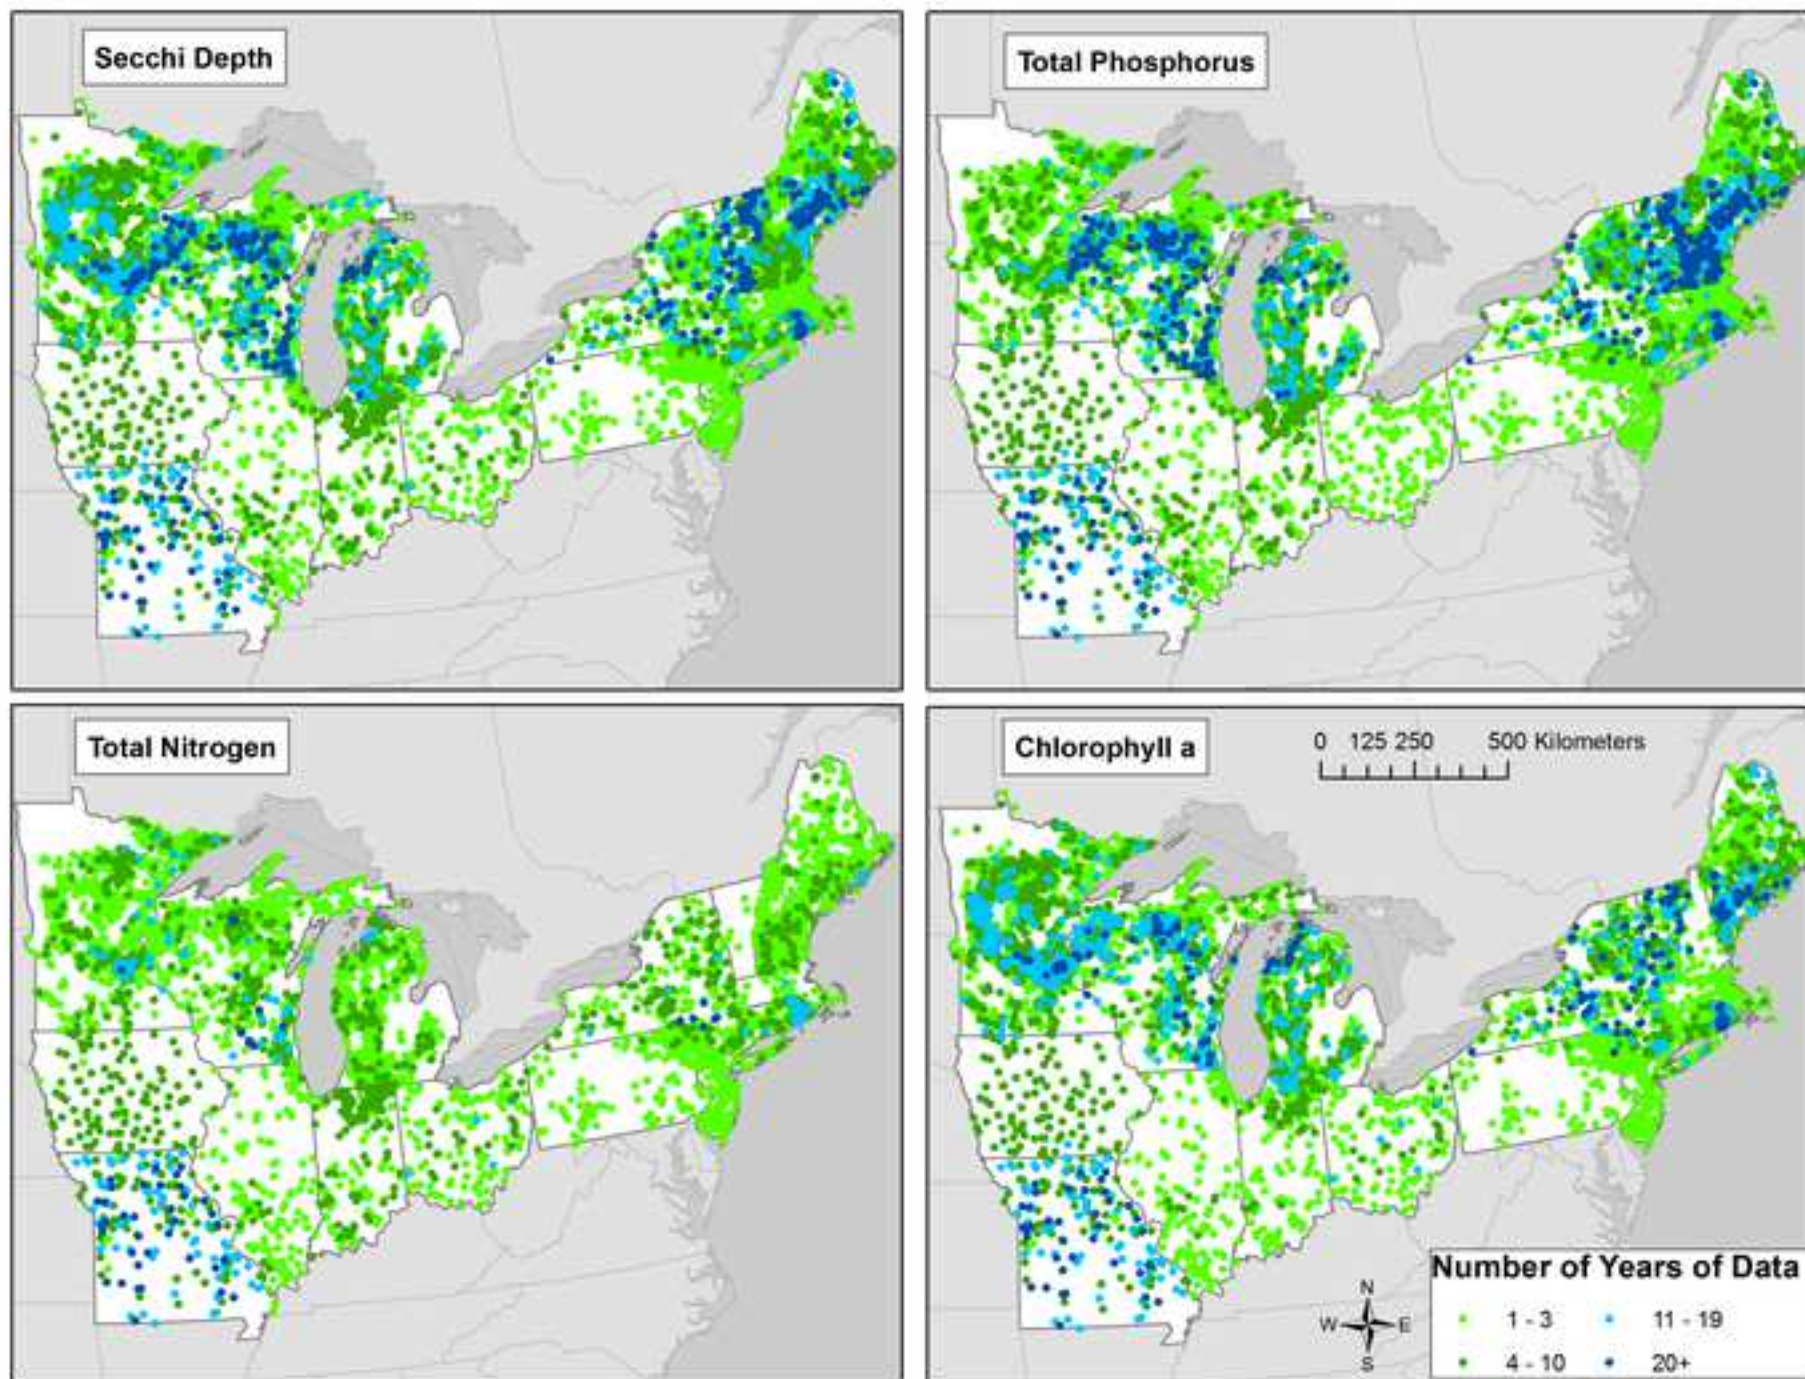

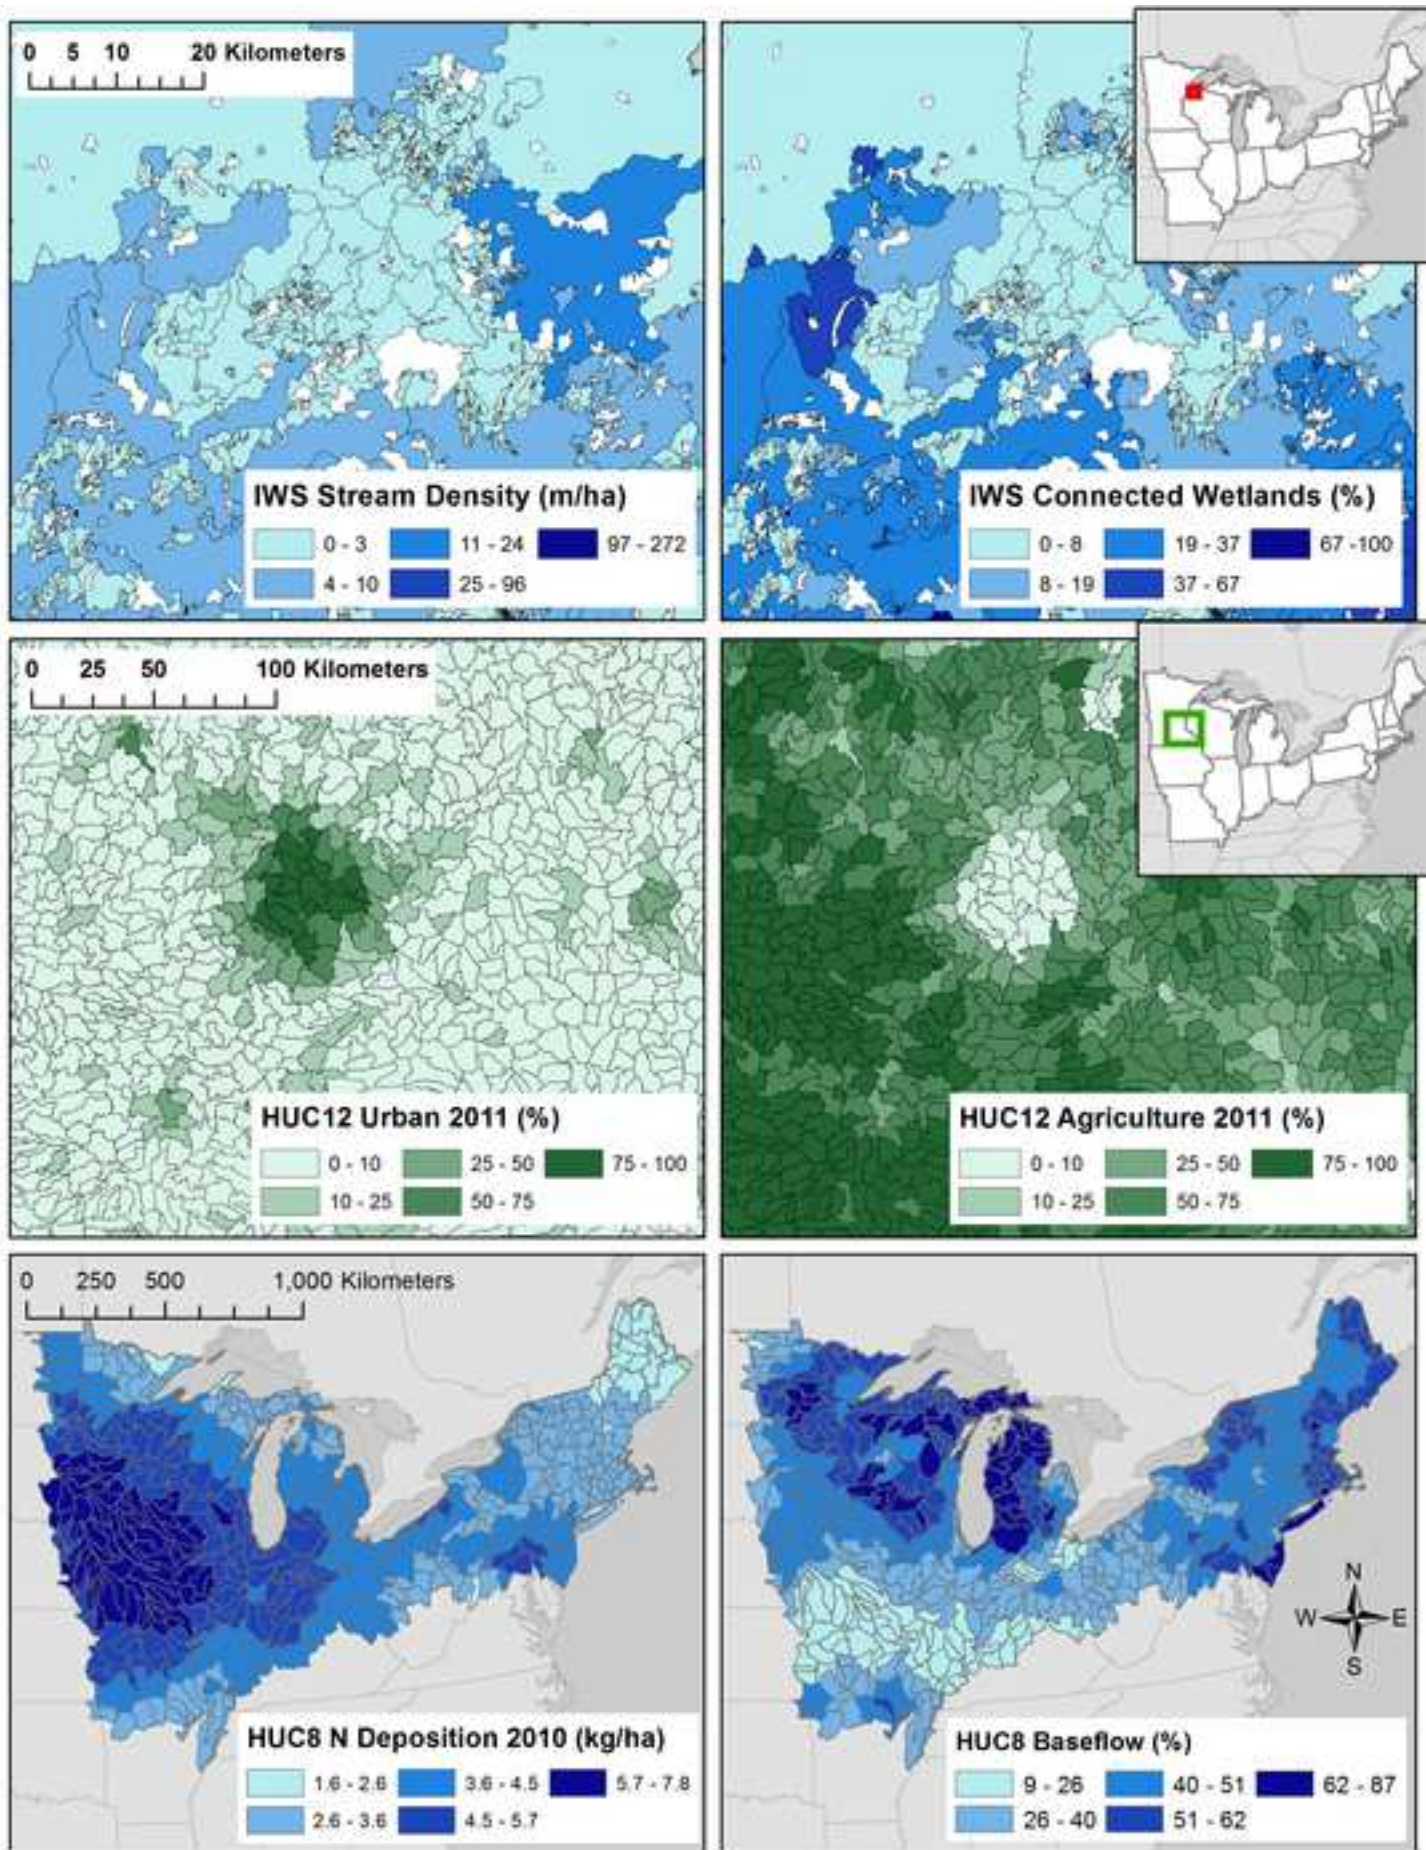

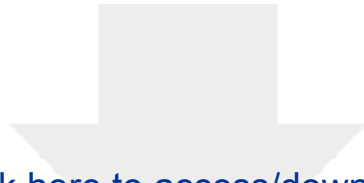

[Click here to access/download](#)

**Supplementary Material**

[Soranno\\_etal\\_2017\\_Additional file 1\\_8SEP17\\_v3.docx](#)

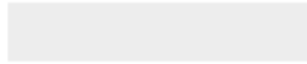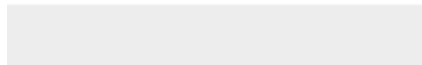



Click here to access/download

**Supplementary Material**

Soranno\_etal\_2017\_Additional file 2\_qaqc-  
limno\_v2.docx



Dr. Goodman, Editor-in-chief  
GigaScience

May 16, 2017

Dear Dr. Goodman,

Please find enclosed our manuscript, *LAGOS-NE: A multi-scaled geospatial temporal database of lake ecological context and water quality for thousands of U.S. lakes* by Soranno et al., which we would like to submit for publication as a *Data Note* in GigaScience. We describe and make available a very large integrated, geospatial database for water quality. Given the size and scope of the database, the Data Note is likely longer than many such articles published in this journal. However, we wanted to include sufficient detail to correctly describe the database for future use of scientists. This is the database for which we described previously in a Review article published in GigaScience in 2015 (<https://gigascience.biomedcentral.com/articles/10.1186/s13742-015-0067-4>). For this Data Note, we are making the data available, and describing the data itself. Given the reception that the previous article received, we think the research community will find our database useful. Also, we appreciated the flexibility that GigaScience provided us in drafting our previous paper that describe the methods in detail, and having the data paper published in the same journal seems to make sense so that future data users can find both papers easily. We have decided to place the data in the Environmental Data Initiative data repository as described in our paper.

We confirm that this manuscript has not been published elsewhere and is not under consideration by another journal. All authors have approved the manuscript, agree with its submission to GigaScience, and have no competing interests.

Michigan State  
University

College of  
Agriculture and  
Natural Resources

DEPARTMENT OF  
FISHERIES AND  
WILDLIFE

480 Wilson Road, Room 13  
Natural Resources Bldg.  
East Lansing, MI 48824

517/355-4478  
FAX: 517/432-1699

We recommend the following reviewers:

Dr. Carly Strasser, DataCite Organization, Oakland, CA [carlystrasser@gmail.com](mailto:carlystrasser@gmail.com)

Dr. Simon Goring, University of Wisconsin, Madison, [goring@wisc.edu](mailto:goring@wisc.edu)

Dr. Matthew Jones, University of California, Santa Barbara, [jones@nceas.ucsb.edu](mailto:jones@nceas.ucsb.edu)

We look forward to hearing from you.

Sincerely,



Dr. Patricia A. Soranno, corresponding author  
Professor  
Michigan State University
