# Supplementary material for: LAGOS-NE: a multi-scaled geospatial and temporal database of lake ecological context and water quality for thousands of US lakes
Source: Oxford University Press journal article supplement (doi:10.1093/gigascience/gix101), 2017-10-19
Supplement: gigascience_6_12_gix101_s5.pdf [file gigascience_6_12_gix101_s5.pdf]

## **Author's Response To Reviewer Comments**

All suggested changes have been made. Please note that some author affiliations have changed, which I updated in the word file, however, i did not see where to change/add author affiliations to the author-boxes in the online form.

I have also made some minor changes to text and figure/table legends based on an internal USGS review that i was required to do because I have numerous USGS-affiliated co-authors. If you would like to see a track-changes version of the word doc that shows those changes, I can provide that. However, they were mostly minor editorial changes.
